# Supplementary material for: Accelerating the repurposing of FDA-approved drugs against coronavirus disease-19 (COVID-19)
Source: Royal Society of Chemistry journal article supplement (doi:10.1039/d0ra09010g), 2020-01-01
Supplement: d0ra09010g2.xlsx [file d0ra09010g2.xlsx]

## Sheet: Summary
Each sheet reports the docking score for each protein included in the IVS panel
Ligands can be found in different tautomers or protonation states, this explains why some of them are repeated
Ligand	SMILES	CAS
Olaparib	c1cccc2c1c(n[nH]c2=O)Cc1cc(c(cc1)F)C(=O)N1CCN(CC1)C(=O)C1CC1	763113-22-0
Dutasteride	C1=C[C@]2([C@H](NC1=O)CC[C@@H]1[C@@H]2CC[C@]2([C@H]1CC[C@@H]2C(=O)Nc1cc(ccc1C(F)(F)F)C(F)(F)F)C)C	164656-23-9
Dolutegravir	c1(cc(c(cc1)CNC(=O)c1cn2c(c(c1=O)[O-])C(=O)N1[C@H](C2)OCC[C@H]1C)F)F	1051375-16-6
Conivaptan	C(=O)(Nc1ccc(cc1)C(=O)N1c2c(c3c(CC1)[nH+]c([nH]3)C)cccc2)c1c(cccc1)c1ccccc1	168626-94-6
Velpatasvir	c1cccc(c1)[C@H](C(=O)N1C[C@H](C[C@H]1c1[nH]c(cn1)c1ccc2c(c1)COc1c2cc2c(c1)c1c(cc2)nc([nH]1)[C@H]1N([C@H](CC1)C)C(=O)[C@@H](NC(=O)OC)C(C)C)COC)NC(=O)OC	1377049-84-7
Lomitapide	[N@H+]1(CC[C@H](CC1)NC(=O)c1c(cccc1)c1ccc(cc1)C(F)(F)F)CCCC[C@]1(c2c(c3c1cccc3)cccc2)C(=O)NCC(F)(F)F	182431-12-5
Entrectinib	c1cc2c(cc1Cc1cc(cc(c1)F)F)c(n[nH]2)NC(=O)c1ccc(cc1NC1CCOCC1)N1CCN(CC1)C	1108743-60-7
Bromocriptine	N12[C@]([C@H]3N(C(=O)[C@@H]2CC(C)C)CCC3)(O[C@](C1=O)(NC(=O)[C@@H]1C=C2c3c4c(C[C@@H]2N(C1)C)c([nH]c4ccc3)Br)C(C)C)O	22260-51-1
Peficitinib	C1[C@@H]2CC3(C[C@@H](C2NC4=C5C=CNC5=NC=C4C(=O)N)CC1C3)O	944118-01-8
Dihydroergotamine	C1[C@@H]2c3cccc4[nH]cc(c34)C[C@@H]2[N@@H+](C)C[C@@H]1C(=O)N[C@@]1(C)C(=O)N2[C@@H](Cc3ccccc3)C(=O)N3CCC[C@H]3[C@@]2(O1)O	6190-39-2
Rutin	c1(c(c(=O)c2c(o1)cc(cc2O)O)O[C@H]1O[C@@H](CO[C@H]2[C@@H]([C@@H]([C@@H]([C@@H](O2)C)O)O)O)[C@@H]([C@@H]([C@H]1O)O)O)c1cc(c(cc1)O)O	207671-50-9

## Sheet: Olaparib
PDB	Docking score
4wm7	-11.8
3t3c	-11.8
3t3c	-11.8
4lsv	-11.6
4j4x	-11.6
2wrc	-11.6
2wr3	-11.6
3nxu	-11.5
2wrh	-11.5
2wrf	-11.5
4i2p	-11.4
2i4v	-11.4
4o4g	-11.3
3kql	-11.3
3kql	-11.3
3kql	-11.3
2bvp	-11.3
3fku	-11.2
4mmr	-11.1
4e78	-11.1
4e78	-11.1
4e7a	-11
4e7a	-11
4cdu	-11
3s11	-11
3rwe	-11
2wrg	-11
2wrg	-11
2wrg	-11
2wrg	-11
2wrg	-11
1oop	-11
4u6h	-10.9
4qrs	-10.9
4q6r	-10.9
4q6r	-10.9
4k7f	-10.9
4j4w	-10.9
4i2q	-10.9
4f3z	-10.9
3rwe	-10.9
3koa	-10.9
3i6l	-10.9
2i4x	-10.9
1klm	-10.9
4wm8	-10.8
4k7f	-10.8
4g43	-10.8
4g42	-10.8
4cey	-10.8
3rwi	-10.8
3rwd	-10.8
3kna	-10.8
3b0w	-10.8
2wre	-10.8
2hjk	-10.8
2bvo	-10.8
2axg	-10.8
1ida	-10.8
4qrs	-10.7
3klv	-10.7
3bwa	-10.7
1syv	-10.7
1hhh	-10.7
4uo3	-10.6
4uo3	-10.6
4uo3	-10.6
4uo3	-10.6
4uo3	-10.6
4uo0	-10.6
4uo0	-10.6
4uo0	-10.6
4uo0	-10.6
4qru	-10.6
4e5e	-10.6
4cew	-10.6
4cdq	-10.6
3u7s	-10.6
3u7s	-10.6
3rwh	-10.6
3rwh	-10.6
3rwc	-10.6
3rwc	-10.6
3kqn	-10.6
3kqn	-10.6
3gsq	-10.6
3gso	-10.6
3ggu	-10.6
3bwa	-10.6
1r6a	-10.6
1p9u	-10.6
4uo7	-10.5
4uo7	-10.5
4uo7	-10.5
4uo7	-10.5
4uo7	-10.5
4uo0	-10.5
4uo0	-10.5
4uo0	-10.5
4uo0	-10.5
4uo0	-10.5
4uo0	-10.5
4uo0	-10.5
4uo0	-10.5
4uo0	-10.5
4uo0	-10.5
4uo0	-10.5
4uo0	-10.5
4uo0	-10.5
4uo0	-10.5
4rw7	-10.5
4qru	-10.5
4i7f	-10.5
4fnk	-10.5
4cdw	-10.5
3kqn	-10.5
3hky	-10.5
3hkw	-10.5
3gsr	-10.5
3gso	-10.5
2wre	-10.5
4uo7	-10.4
4rw6	-10.4
4mkb	-10.4
4gua	-10.4
4g9z	-10.4
4g9f	-10.4
4cqv	-10.4
4cdx	-10.4
3vcl	-10.4
3vcl	-10.4
3rwg	-10.4
3rwg	-10.4
3r4b	-10.4
3bw9	-10.4
3bw9	-10.4
3bew	-10.4
2ygc	-10.4
2i4d	-10.4
1hhk	-10.4
1hhj	-10.4
1hhi	-10.4
4uo5	-10.3
4uo5	-10.3
4uo5	-10.3
4unx	-10.3
4rw9	-10.3
4o44	-10.3
4j4r	-10.3
4g9z	-10.3
3r4b	-10.3
3d0h	-10.3
3bev	-10.3
3alw	-10.3
2ygc	-10.3
2wr2	-10.3
2wr0	-10.3
2wr0	-10.3
2wr0	-10.3
2wr0	-10.3
2wr0	-10.3
2i4w	-10.3
2i4u	-10.3
2gec	-10.3
2gec	-10.3
1quv	-10.3
4uo2	-10.2
4uo2	-10.2
4uo2	-10.2
4uo2	-10.2
4uo2	-10.2
4uo2	-10.2
4unx	-10.2
4unx	-10.2
4unx	-10.2
4rw4	-10.2
4rw4	-10.2
4mka	-10.2
4mk9	-10.2
4mk9	-10.2
4j4y	-10.2
4fqr	-10.2
4fqr	-10.2
4a92	-10.2
4a92	-10.2
3gsw	-10.2
3gsw	-10.2
3gsq	-10.2
2wr2	-10.2
1izh	-10.2
4pv9	-10.1
4mgu	-10.1
4lsr	-10.1
4j4u	-10.1
3cj0	-10.1
2wre	-10.1
2wr1	-10.1
2wr1	-10.1
2wa1	-10.1
2hcs	-10.1
1izi	-10.1
1a41	-10.1
4uny	-10
4qhk	-10
4opa	-10
4mka	-10
4mk7	-10
4mk7	-10
4lkj	-10
4j6r	-10
4hkj	-10
4fqv	-10
4fqv	-10
4fqj	-10
3ztj	-10
3vbo	-10
3lkh	-10
3kqh	-10
3kms	-10
3iyw	-10
3iyw	-10
3iyw	-10
3iyw	-10
3gsx	-10
3gsx	-10
2wr1	-10
2uv0	-10
2uv0	-10
2htw	-10
4uo3	-9.9
4uo3	-9.9
4uo3	-9.9
4uo3	-9.9
4uo3	-9.9
4mkb	-9.9
4m8y	-9.9
4lst	-9.9
4j4v	-9.9
4j4v	-9.9
4j4v	-9.9
4j4v	-9.9
4j4s	-9.9
4j4s	-9.9
4fnk	-9.9
3n0i	-9.9
3lkh	-9.9
3iyw	-9.9
3iyw	-9.9
3h98	-9.9
3ggu	-9.9
3cj5	-9.9
3ciz	-9.9
3ciz	-9.9
2ygb	-9.9
2ygb	-9.9
4unw	-9.8
4unw	-9.8
4rw8	-9.8
4m30	-9.8
4kps	-9.8
4j4v	-9.8
4ej8	-9.8
4e5l	-9.8
3vbr	-9.8
3ok9	-9.8
3oah	-9.8
3mj5	-9.8
3mj5	-9.8
3cj5	-9.8
3cj2	-9.8
3cj2	-9.8
3cj0	-9.8
2hu0	-9.8
1v3d	-9.8
1v3d	-9.8
1pk0	-9.8
4unw	-9.7
4jo8	-9.7
4fvu	-9.7
4ejl	-9.7
4ej8	-9.7
4e5f	-9.7
4cqw	-9.7
4bh0	-9.7
4bac	-9.7
3sdy	-9.7
3sdy	-9.7
3pqy	-9.7
3n0i	-9.7
3hkw	-9.7
3h98	-9.7
3h2l	-9.7
3gsv	-9.7
3gsv	-9.7
3gsu	-9.7
3gsu	-9.7
3d0g	-9.7
3cj3	-9.7
3cj3	-9.7
2wre	-9.7
2wre	-9.7
2uv0	-9.7
1idb	-9.7
1b53	-9.7
4uo8	-9.6
4mk8	-9.6
4m8x	-9.6
4lsu	-9.6
4iv3	-9.6
4ejl	-9.6
3hkw	-9.6
3h2l	-9.6
2wre	-9.6
2uv0	-9.6
spike_RBD	-9.5
4mze	-9.5
4mze	-9.5
4mk8	-9.5
4mj0	-9.5
4m8y	-9.5
4m8x	-9.5
4lsu	-9.5
4jpk	-9.5
4gag	-9.5
4gag	-9.5
4f3i	-9.5
4e92	-9.5
4e91	-9.5
4e76	-9.5
3tid	-9.5
3hky	-9.5
3cj4	-9.5
3alx	-9.5
2wr2	-9.5
2vvw	-9.5
2vvw	-9.5
2uv0	-9.5
2uv0	-9.5
2uv0	-9.5
2uv0	-9.5
2uv0	-9.5
2uv0	-9.5
2uv0	-9.5
2hty	-9.5
1v2i	-9.5
1n5a	-9.5
4pg2	-9.4
4mj1	-9.4
4mds	-9.4
4i2p	-9.4
4fqi	-9.4
4fqi	-9.4
4f3i	-9.4
4cr0	-9.4
4adf	-9.4
4adf	-9.4
4adf	-9.4
4adf	-9.4
4adf	-9.4
4adf	-9.4
3se9	-9.4
3sdy	-9.4
3nf8	-9.4
3mlh	-9.4
3i6g	-9.4
3cpl	-9.4
3cpl	-9.4
2vvx	-9.4
2vvx	-9.4
2hu4	-9.4
2hu4	-9.4
2hu4	-9.4
2hu4	-9.4
1v2i	-9.4
4pv9	-9.3
4pv9	-9.3
4mms	-9.3
4mds	-9.3
4jb9	-9.3
4eee	-9.3
3tid	-9.3
3nf8	-9.3
3gsr	-9.3
3d23	-9.3
3cj4	-9.3
2xi5	-9.3
2xi5	-9.3
2mgu	-9.3
1v3e	-9.3
4i2q	-9.2
4e5g	-9.2
4dag	-9.2
4bgy	-9.2
3kmq	-9.2
2xra	-9.2
2wr7	-9.2
2wr4	-9.2
1n59	-9.2
4uo6	-9.1
4uo6	-9.1
4mg3	-9.1
4gaj	-9.1
4e5j	-9.1
4dgd	-9.1
3u82	-9.1
3u82	-9.1
3tie	-9.1
3tie	-9.1
3se8	-9.1
3se8	-9.1
3rki	-9.1
3ku3	-9.1
3ku3	-9.1
2z35	-9.1
1v3e	-9.1
4gaj	-9
4g9f	-9
4e5i	-9
4bh4	-9
4bh4	-9
4bh4	-9
4bh4	-9
3ro5	-9
3nwf	-9
3nf7	-9
3bwa	-9
3avf	-9
2xwy	-9
2x83	-9
2uv0	-9
2oy0	-9
2iph	-9
2ghw	-9
1v3c	-9
1v3b	-9
4qhn	-8.9
4pv8	-8.9
4mg3	-8.9
4gzf	-8.9
4gzf	-8.9
4egt	-8.9
3v3m	-8.9
3v3m	-8.9
3sv8	-8.9
3ebj	-8.9
2x83	-8.9
2oy0	-8.9
2iph	-8.9
2iph	-8.9
2ge7	-8.9
1v3c	-8.9
4fqi	-8.8
4ffz	-8.8
4cqq	-8.8
4cqp	-8.8
4cqp	-8.8
4cqp	-8.8
4bgz	-8.8
3zpb	-8.8
3zpb	-8.8
3zp3	-8.8
3vbh	-8.8
3ku6	-8.8
3ku6	-8.8
3d23	-8.8
3avl	-8.8
2iph	-8.8
1v3c	-8.8
1sys	-8.8
1sk7	-8.8
1r6a	-8.8
4i31	-8.7
4i31	-8.7
4gv3	-8.7
4gv3	-8.7
4gu4	-8.7
4gu4	-8.7
4gu4	-8.7
4gu4	-8.7
4gu4	-8.7
4gu4	-8.7
4g8g	-8.7
4fqy	-8.7
4fqy	-8.7
4cqx	-8.7
4cqr	-8.7
4cqq	-8.7
4bh3	-8.7
4bh3	-8.7
4bh3	-8.7
4bh3	-8.7
4bgw	-8.7
4bgw	-8.7
3zp2	-8.7
3o4l	-8.7
3d0i	-8.7
3ava	-8.7
3ava	-8.7
3alz	-8.7
2c36	-8.7
2c36	-8.7
1b50	-8.7
main_protease	-8.6
5ajm	-8.6
5ajm	-8.6
5ajm	-8.6
5ajm	-8.6
5ajm	-8.6
5ajm	-8.6
4qrt	-8.6
4mmu	-8.6
4kpq	-8.6
4gu3	-8.6
4gu3	-8.6
4gu3	-8.6
4gu3	-8.6
4gu3	-8.6
4gu3	-8.6
4gu3	-8.6
4gu3	-8.6
4gu3	-8.6
4gu3	-8.6
4gu3	-8.6
4gu3	-8.6
4g8g	-8.6
4dgc	-8.6
4dgc	-8.6
4dgc	-8.6
4dgc	-8.6
4cqy	-8.6
3zp6	-8.6
3zp1	-8.6
3zp0	-8.6
3s13	-8.6
3nf6	-8.6
3nf6	-8.6
2x5i	-8.6
2ht5	-8.6
1v3b	-8.6
4jkp	-8.5
4iv1	-8.5
4fp8	-8.5
4fp8	-8.5
4ejd	-8.5
4ejd	-8.5
4ejd	-8.5
4dgc	-8.5
4dgc	-8.5
4cqu	-8.5
4bh2	-8.5
4bh2	-8.5
3lqa	-8.5
3ku5	-8.5
3ku5	-8.5
3iyp	-8.5
3avn	-8.5
2htu	-8.5
1rzk	-8.5
4qhl	-8.4
4jkp	-8.4
4fb3	-8.4
4eq0	-8.4
4cqu	-8.4
4cqu	-8.4
4cqu	-8.4
4cqu	-8.4
3nw8	-8.4
3nfa	-8.4
3nfa	-8.4
3nf9	-8.4
3nf9	-8.4
3nf6	-8.4
3avj	-8.4
3avc	-8.4
4qru	-8.3
4pv8	-8.3
4mza	-8.3
4jpj	-8.3
4eq0	-8.3
4cqu	-8.3
3uf5	-8.3
3p8o	-8.3
3nwa	-8.3
3nwa	-8.3
3nf9	-8.3
3nf9	-8.3
3nf8	-8.3
3nf8	-8.3
3nf6	-8.3
2zu5	-8.3
2wh6	-8.3
2hcn	-8.3
2c7u	-8.3
1yh3	-8.3
1rzj	-8.3
4mza	-8.2
4ep3	-8.2
4ep3	-8.2
4dgd	-8.2
4cqs	-8.2
4cqs	-8.2
4cqr	-8.2
4cqp	-8.2
4cqp	-8.2
4cqp	-8.2
3nfa	-8.2
3nf7	-8.2
3avh	-8.2
3avg	-8.2
3avb	-8.2
3avb	-8.2
3avb	-8.2
2ghv	-8.2
2axf	-8.2
1v3c	-8.2
1rv7	-8.2
1p9s	-8.2
4gve	-8.1
4dkp	-8.1
4bgx	-8.1
4bgx	-8.1
3ztn	-8.1
3zpa	-8.1
3su1	-8.1
3rwj	-8.1
3rwj	-8.1
3rwi	-8.1
3nfa	-8.1
3nf7	-8.1
3nf7	-8.1
3avl	-8.1
3avg	-8.1
3avb	-8.1
2zu4	-8.1
2yol	-8.1
2yol	-8.1
2axf	-8.1
4qrt	-8
4lss	-8
4g9d	-8
4cqz	-8
4cqz	-8
4cqq	-8
4co6	-8
3sv7	-8
3suf	-8
3oah	-8
3avh	-8
3ava	-8
3ava	-8
2xze	-8
2vvy	-8
2bvq	-8
4uo4	-7.9
4qrt	-7.9
4mmv	-7.9
4mmt	-7.9
4i32	-7.9
4dkq	-7.9
3vbf	-7.9
3vbf	-7.9
3uqi	-7.9
3uqi	-7.9
3su6	-7.9
2xpx	-7.9
2xpx	-7.9
2me4	-7.9
2ge8	-7.9
4oph	-7.8
4mj1	-7.8
4lkk	-7.8
4eqj	-7.8
4dko	-7.8
4bh1	-7.8
4bh1	-7.8
4bh1	-7.8
3su2	-7.8
3rwf	-7.8
3rwf	-7.8
3a07	-7.8
2wh6	-7.8
2q7c	-7.8
2q7c	-7.8
2q7c	-7.8
2lsp	-7.8
1rpi	-7.8
1rpi	-7.8
4mj0	-7.7
4gye	-7.7
4gye	-7.7
4g1o	-7.7
4ejd	-7.7
4ejd	-7.7
4ejd	-7.7
3su3	-7.7
3su3	-7.7
3su2	-7.7
3su2	-7.7
3su1	-7.7
3su0	-7.7
3sud	-7.6
3sit	-7.6
3sit	-7.6
3sit	-7.6
3sit	-7.6
3sit	-7.6
3sit	-7.6
3gsw	-7.6
2ztz	-7.6
4gv9	-7.5
4ffy	-7.5
4ejd	-7.5
4ejd	-7.5
4ejd	-7.5
4e92	-7.5
4dga	-7.5
4dga	-7.5
4c1w	-7.5
3su0	-7.5
2yka	-7.5
2me2	-7.5
1rq9	-7.5
4oyd	-7.4
4b8e	-7.4
4b8e	-7.4
4b8e	-7.4
3w39	-7.4
3rkc	-7.4
3p8n	-7.4
4lkh	-7.3
4ejk	-7.3
4ejk	-7.3
4dmn	-7.3
4dmn	-7.3
4dgb	-7.3
4dgb	-7.3
3sv7	-7.3
3sue	-7.3
3su5	-7.3
3sis	-7.3
3m5h	-7.3
3ifu	-7.3
3gsn	-7.3
3avk	-7.3
2zu1	-7.3
2yhf	-7.3
papain_protease	-7.2
4lsp	-7.2
4g9d	-7.2
4g8i	-7.2
4ekx	-7.2
3vie	-7.2
2xze	-7.2
1z8r	-7.2
1f08	-7.2
4g1g	-7.1
4ejk	-7.1
3sv9	-7.1
3su5	-7.1
3sis	-7.1
2xya	-7.1
2wfo	-7.1
2ca1	-7.1
1qz8	-7.1
4lcx	-7
3sv9	-7
3sv6	-7
3sv6	-7
3sud	-7
3su5	-7
3su4	-7
3su4	-7
3gzf	-7
2zty	-7
1qr8	-7
4i33	-6.9
4g8i	-6.9
3sug	-6.9
3m5i	-6.9
2wfo	-6.9
2vxw	-6.9
2q5u	-6.9
2q5u	-6.9
2q5u	-6.9
2q5u	-6.9
2q5u	-6.9
2q5u	-6.9
2m3m	-6.9
2hfz	-6.9
2g69	-6.9
2g69	-6.9
1zsd	-6.9
1qr9	-6.9
3sug	-6.8
3su6	-6.8
3s12	-6.8
3avj	-6.8
2q7c	-6.8
2q7c	-6.8
2q7c	-6.8
2m3l	-6.8
2gvf	-6.8
4nwk	-6.7
3zd0	-6.7
3b71	-6.7
3b71	-6.7
3avc	-6.7
2zu3	-6.7
2zol	-6.7
4oyd	-6.6
4nwk	-6.6
3u83	-6.6
3avn	-6.6
2yhh	-6.6
2y1s	-6.6
4nwl	-6.5
4b4n	-6.5
4b4n	-6.5
3u83	-6.5
2v6q	-6.5
2l2f	-6.5
4g1l	-6.4
3avk	-6.4
4ipz	-6.3
4ipz	-6.3
4ipz	-6.3
4ipz	-6.3
4ipz	-6.3
4ipz	-6.3
4ipz	-6.3
4ipz	-6.3
4ipz	-6.3
4ipz	-6.3
4ipz	-6.3
4c1w	-6.3
4mod	-6.2
4mod	-6.2
4ipz	-6.2
4epj	-6.2
4epj	-6.1
2c86	-6.1
2c3a	-6.1
4ejr	-6
3vie	-6
4adq	-5.9
2mkr	-5.9
3kqk	-5.8
3giv	-5.8
4adq	-5.7
2vxj	-5.7
3vtt	-5.5
4kol	-5.4
3i6k	-5.4
4kom	-5.3
4g2k	-5.2
3vtt	-5.2
4ep2	-5.1
2x9m	-5.1
4ep2	-5
4kon	-4.9
2me3	-4.9
2l3h	-4.9
3j22	-4.8
3j23	-4.7
4uoa	-4.6
4g2k	-4.5
1hhg	-4.3
2jw8	-3.9
4lki	-3.7
1knz	-3.2
4qhm	-2.9
2wrb	-2.7
3m5g	-2.5
4dge	-1.5
3vu5	-1.3
2zsv	-1.1
2zsv	-1
4e0r	-0.5
3m5j	-0.4
4fqm	-0.1

## Sheet: Dutasteride
PDB	Docking score
4wm7	-12.8
3t3c	-12.6
3t3c	-12.5
3nxu	-12.5
2i4x	-12.4
4j4x	-12.3
2i4v	-12.3
4rw6	-12.2
3r4b	-12.2
2i4d	-12.1
4wm8	-12
3bwa	-12
3b0w	-12
2axg	-12
4q6r	-11.9
4q6r	-11.9
4k7f	-11.9
4k7f	-11.9
3r4b	-11.9
1oop	-11.9
1hhh	-11.9
4rw4	-11.8
4rw4	-11.8
4o44	-11.8
4g42	-11.8
3u7s	-11.8
3u7s	-11.8
2i4w	-11.8
3rwd	-11.7
3ggu	-11.7
3bw9	-11.7
2wrg	-11.7
2wrg	-11.7
2wrg	-11.7
2i4u	-11.7
4uo5	-11.6
4j4w	-11.6
3vcl	-11.6
3vcl	-11.6
3bw9	-11.6
2wrg	-11.6
2wrg	-11.6
1p9u	-11.6
1ida	-11.6
4uo5	-11.5
4uo5	-11.5
4rw7	-11.5
4qru	-11.5
4qru	-11.5
4qrs	-11.5
4m30	-11.5
4g9f	-11.5
4cew	-11.5
4lsv	-11.4
3rwg	-11.4
3rwg	-11.4
3kql	-11.4
3bew	-11.4
1idb	-11.4
1hhj	-11.4
4m8y	-11.3
4j4v	-11.3
4j4v	-11.3
4j4v	-11.3
4j4v	-11.3
3ztj	-11.3
3vbr	-11.3
3rwi	-11.3
3rwh	-11.3
3rwh	-11.3
3rwe	-11.3
3rwc	-11.3
3rwc	-11.3
3lkh	-11.3
3kqn	-11.3
3kqn	-11.3
3kqn	-11.3
3kql	-11.3
3kql	-11.3
3koa	-11.3
3i6l	-11.3
3gso	-11.3
2hcs	-11.3
2bvp	-11.3
1hhk	-11.3
4uo0	-11.2
4uo0	-11.2
4m8y	-11.2
4j4v	-11.2
4e78	-11.2
3rwe	-11.2
3ok9	-11.2
3lkh	-11.2
3gso	-11.2
4uo2	-11.1
4uo2	-11.1
4uo2	-11.1
4uo2	-11.1
4uo0	-11.1
4uo0	-11.1
4uo0	-11.1
4uo0	-11.1
4uo0	-11.1
4uo0	-11.1
4j4y	-11.1
4gua	-11.1
4fqj	-11.1
3h98	-11.1
3h98	-11.1
2hjk	-11.1
2bvo	-11.1
1hhi	-11.1
4uo7	-11
4uo7	-11
4uo7	-11
4uo7	-11
4uo7	-11
4uo7	-11
4uo3	-11
4uo3	-11
4uo3	-11
4uo3	-11
4uo3	-11
4uo2	-11
4uo2	-11
4uo0	-11
4uo0	-11
4uo0	-11
4uo0	-11
4uo0	-11
4uo0	-11
4qrs	-11
4m8x	-11
4m8x	-11
4cey	-11
3kna	-11
3gsr	-11
3gsq	-11
3gsq	-11
3ggu	-11
3bev	-11
2wr1	-11
2wr1	-11
2wr0	-11
2wr0	-11
2wr0	-11
2wr0	-11
2vvw	-11
1izi	-11
4uo0	-10.9
4uo0	-10.9
4uo0	-10.9
4unx	-10.9
4unx	-10.9
4unw	-10.9
4unw	-10.9
4opa	-10.9
4mkb	-10.9
4fnk	-10.9
3vbo	-10.9
3tie	-10.9
3tie	-10.9
3s11	-10.9
3ciz	-10.9
3ciz	-10.9
2wrh	-10.9
2wre	-10.9
2wr1	-10.9
2uv0	-10.9
2uv0	-10.9
2uv0	-10.9
2uv0	-10.9
2uv0	-10.9
2gec	-10.9
1r6a	-10.9
1n59	-10.9
1izh	-10.9
4uo0	-10.8
4mkb	-10.8
4i2q	-10.8
3kqh	-10.8
2wre	-10.8
2wre	-10.8
2wre	-10.8
2wre	-10.8
2wre	-10.8
2wr3	-10.8
2wr0	-10.8
2wa1	-10.8
2vvw	-10.8
2uv0	-10.8
2uv0	-10.8
2uv0	-10.8
2uv0	-10.8
2uv0	-10.8
4unx	-10.7
4unx	-10.7
4unw	-10.7
4rw8	-10.7
4mk9	-10.7
4j4r	-10.7
4ejl	-10.7
4e5e	-10.7
3hkw	-10.7
3hkw	-10.7
3gsw	-10.7
3fku	-10.7
3cj3	-10.7
3cj3	-10.7
3cj0	-10.7
3cj0	-10.7
2ygc	-10.7
2ygc	-10.7
1syv	-10.7
4rw9	-10.6
4pg2	-10.6
4o4g	-10.6
4mka	-10.6
4mka	-10.6
4mk8	-10.6
4mk8	-10.6
4ejl	-10.6
4bac	-10.6
3cj4	-10.6
3cj2	-10.6
3bwa	-10.6
2uv0	-10.6
4pv9	-10.5
4mmr	-10.5
4mk9	-10.5
4j4u	-10.5
4e7a	-10.5
4e7a	-10.5
4a92	-10.5
3cj5	-10.5
3cj4	-10.5
3cj2	-10.5
2ygb	-10.5
2ygb	-10.5
4fnk	-10.4
4e5l	-10.4
4e5f	-10.4
3nf7	-10.4
3n0i	-10.4
3h2l	-10.4
3h2l	-10.4
3cpl	-10.4
3cj5	-10.4
2wrf	-10.4
2wr4	-10.4
2wr2	-10.4
2wr2	-10.4
2wr2	-10.4
1quv	-10.4
4g43	-10.3
4e5g	-10.3
4cqv	-10.3
4bh0	-10.3
4a92	-10.3
3nf7	-10.3
3hky	-10.3
3hky	-10.3
3gsw	-10.3
3cpl	-10.3
1pk0	-10.3
4mgu	-10.2
4lst	-10.2
4f3z	-10.2
4e78	-10.2
3tid	-10.2
3nf7	-10.2
3nf7	-10.2
3n0i	-10.2
2wr7	-10.2
2hu0	-10.2
2gec	-10.2
1n5a	-10.2
4u6h	-10.1
4qhk	-10.1
4mk7	-10.1
4lsr	-10.1
4cdq	-10.1
3nf8	-10.1
3hkw	-10.1
2uv0	-10.1
1klm	-10.1
4uo3	-10
4uo3	-10
4uo3	-10
4uo3	-10
4qhn	-10
4mk7	-10
4mj0	-10
4g9f	-10
4cdw	-10
4adf	-10
4adf	-10
3tid	-10
3nf9	-10
3nf8	-10
3nf8	-10
3klv	-10
3ebj	-10
3d0g	-10
3avh	-10
2vvx	-10
2vvx	-10
2hty	-10
1a41	-10
4uo3	-9.9
4mj1	-9.9
4i2p	-9.9
4gag	-9.9
4ej8	-9.9
4cdu	-9.9
3nf9	-9.9
3avg	-9.9
4pv9	-9.8
4pv9	-9.8
4mds	-9.8
4mds	-9.8
4lsu	-9.8
4kpq	-9.8
4i2p	-9.8
4gaj	-9.8
4ej8	-9.8
4adf	-9.8
4adf	-9.8
4adf	-9.8
3iyw	-9.8
3iyw	-9.8
3iyw	-9.8
3iyw	-9.8
3iyw	-9.8
3d0h	-9.8
2xi5	-9.8
4jo8	-9.7
4gag	-9.7
4cqx	-9.7
4bgz	-9.7
4adf	-9.7
3nf6	-9.7
3lqa	-9.7
3iyw	-9.7
2xwy	-9.7
2oy0	-9.7
1sk7	-9.7
4uny	-9.6
4lsu	-9.6
4j4s	-9.6
4j4s	-9.6
4cdx	-9.6
3se9	-9.6
3nf6	-9.6
2x83	-9.6
2x83	-9.6
1r6a	-9.6
4uo6	-9.5
4mmu	-9.5
4fqr	-9.5
4ffz	-9.5
4egt	-9.5
4e91	-9.5
3uf5	-9.5
3ava	-9.5
4g8g	-9.4
4fqy	-9.4
4fqy	-9.4
4fqr	-9.4
4cqw	-9.4
4bh2	-9.4
4bh2	-9.4
3se8	-9.4
3se8	-9.4
3nfa	-9.4
3d23	-9.4
3ava	-9.4
1v3e	-9.4
1v2i	-9.4
1v2i	-9.4
4pv8	-9.3
4kps	-9.3
4g8g	-9.3
4dag	-9.3
4co6	-9.3
3zp1	-9.3
3oah	-9.3
3nfa	-9.3
3nfa	-9.3
3nfa	-9.3
3nf6	-9.3
3mlh	-9.3
3i6g	-9.3
3d23	-9.3
2z35	-9.3
2ghw	-9.3
1v3c	-9.3
1v3c	-9.3
1v3c	-9.3
1v3b	-9.3
4jb9	-9.2
4bgy	-9.2
4bgw	-9.2
4bgw	-9.2
3v3m	-9.2
3nf9	-9.2
3ku3	-9.2
3ku3	-9.2
1b53	-9.2
4gaj	-9.1
4fp8	-9.1
4fp8	-9.1
4cqz	-9.1
4cqz	-9.1
4bh1	-9.1
4bh1	-9.1
3zpb	-9.1
3zpb	-9.1
3zp3	-9.1
3v3m	-9.1
3rki	-9.1
3o4l	-9.1
3nf9	-9.1
3ava	-9.1
3alz	-9.1
2wrc	-9.1
1v3e	-9.1
1v3c	-9.1
1rzk	-9.1
4i7f	-9
4e76	-9
4cqs	-9
4cqs	-9
4bgx	-9
3nwf	-9
3nf8	-9
3ku6	-9
3ku6	-9
3gsv	-9
3avl	-9
3avb	-9
3avb	-9
3ava	-9
2xi5	-9
5ajm	-8.9
5ajm	-8.9
4uo6	-8.9
4qhl	-8.9
4pv8	-8.9
4mj1	-8.9
4g9z	-8.9
4fqi	-8.9
4cqu	-8.9
4cqu	-8.9
4cqu	-8.9
4cqr	-8.9
4cqr	-8.9
4cqq	-8.9
4cqq	-8.9
4cqq	-8.9
3zp2	-8.9
3ro5	-8.9
3nw8	-8.9
3gsv	-8.9
3bwa	-8.9
3avb	-8.9
2ht5	-8.9
1v3d	-8.9
1v3d	-8.9
1rzj	-8.9
5ajm	-8.8
5ajm	-8.8
5ajm	-8.8
4mg3	-8.8
4g9z	-8.8
4cr0	-8.8
4cqu	-8.8
4cqu	-8.8
4cqu	-8.8
4cqp	-8.8
4bh1	-8.8
3vbh	-8.8
3sdy	-8.8
3sdy	-8.8
3s13	-8.8
3rwj	-8.8
3gsx	-8.8
3gsu	-8.8
3avl	-8.8
3avb	-8.8
2mgu	-8.8
1v3b	-8.8
5ajm	-8.7
4uo8	-8.7
4mg3	-8.7
4iv1	-8.7
4fqi	-8.7
4fqi	-8.7
4cqp	-8.7
4cqp	-8.7
4cqp	-8.7
4cqp	-8.7
3zpa	-8.7
3zp6	-8.7
3zp0	-8.7
3rwj	-8.7
3oah	-8.7
3nf6	-8.7
3mj5	-8.7
3mj5	-8.7
3avg	-8.7
2oy0	-8.7
2c36	-8.7
2c36	-8.7
4ejd	-8.6
4cqp	-8.6
4bgx	-8.6
3ku5	-8.6
3ku5	-8.6
3gsx	-8.6
3gsr	-8.6
2xra	-8.6
2vvy	-8.6
2hu4	-8.6
2hu4	-8.6
2htw	-8.6
2htu	-8.6
2ge8	-8.6
1yh3	-8.6
4mza	-8.5
4mza	-8.5
4f3i	-8.5
4f3i	-8.5
4eq0	-8.5
4ejd	-8.5
4ejd	-8.5
4dkq	-8.5
4cqy	-8.5
4bh4	-8.5
3u82	-8.5
3pqy	-8.5
3gsu	-8.5
3avn	-8.5
3avj	-8.5
3avc	-8.5
2zu5	-8.5
2zu4	-8.5
2wh6	-8.5
2hu4	-8.5
2hu4	-8.5
main_protease	-8.4
4qrt	-8.4
4lkj	-8.4
4hkj	-8.4
4bh4	-8.4
4bh4	-8.4
3u82	-8.4
3alx	-8.4
2ge7	-8.4
1rv7	-8.4
1rpi	-8.4
4gv3	-8.3
3ztn	-8.3
3sdy	-8.3
3rwi	-8.3
3nwa	-8.3
3nwa	-8.3
2xze	-8.3
2ghv	-8.3
4lsp	-8.2
4gv3	-8.2
4dgd	-8.2
4dga	-8.2
4dga	-8.2
3avh	-8.2
2c7u	-8.2
1p9s	-8.2
spike_RBD	-8.1
papain_protease	-8.1
4mms	-8.1
4lss	-8.1
4j6r	-8.1
4iv3	-8.1
4i2q	-8.1
4fb3	-8.1
4e5j	-8.1
4bh3	-8.1
4bh3	-8.1
4bh3	-8.1
4bh3	-8.1
3alw	-8.1
2iph	-8.1
2iph	-8.1
2iph	-8.1
2iph	-8.1
2hfz	-8.1
1rpi	-8.1
4qru	-8
4mze	-8
4gzf	-8
4gve	-8
4fqv	-8
4ep3	-8
4e92	-8
3rwf	-8
2xze	-8
1rq9	-8
4qrt	-7.9
4oph	-7.9
4mmv	-7.9
4jkp	-7.9
4i32	-7.9
4gzf	-7.9
4fqv	-7.9
4ejk	-7.9
4ejk	-7.9
2xya	-7.9
2hcn	-7.9
4mj0	-7.8
4jkp	-7.8
4ep3	-7.8
4ejd	-7.8
4eee	-7.8
4e5i	-7.8
3vbf	-7.8
3vbf	-7.8
3sis	-7.8
3sis	-7.8
3rwf	-7.8
2wh6	-7.8
2q7c	-7.8
2q7c	-7.8
2bvq	-7.8
2axf	-7.8
1sys	-7.8
4nwk	-7.7
4i31	-7.7
4i31	-7.7
4fvu	-7.7
3sv9	-7.7
3sit	-7.7
3sit	-7.7
2zu1	-7.7
4qrt	-7.6
4mmt	-7.6
4ejd	-7.6
4ejd	-7.6
4ejd	-7.6
4dgd	-7.6
4dgc	-7.6
4bh4	-7.6
3sv9	-7.6
3sit	-7.6
3sit	-7.6
3m5h	-7.6
3gsn	-7.6
3avf	-7.6
2zty	-7.6
2q7c	-7.6
2lsp	-7.6
2g69	-7.6
2g69	-7.6
2axf	-7.6
4ipz	-7.5
4eq0	-7.5
4dko	-7.5
4dgc	-7.5
4dgc	-7.5
4dgc	-7.5
4dgc	-7.5
4dgc	-7.5
3sv6	-7.5
3sud	-7.5
3gsw	-7.5
3avk	-7.5
2ca1	-7.5
4jpj	-7.4
4ipz	-7.4
4ipz	-7.4
4ipz	-7.4
4ffy	-7.4
4ejd	-7.4
3u83	-7.4
3su3	-7.4
3kms	-7.4
4oyd	-7.3
4ipz	-7.3
4ipz	-7.3
4ipz	-7.3
4ipz	-7.3
4ipz	-7.3
4g9d	-7.3
4dkp	-7.3
4dgb	-7.3
3w39	-7.3
3u83	-7.3
3su6	-7.3
3su2	-7.3
3su1	-7.3
3sit	-7.3
3m5i	-7.3
3ifu	-7.3
3gzf	-7.3
2xpx	-7.3
4ipz	-7.2
4e92	-7.2
4dmn	-7.2
3p8n	-7.2
2xpx	-7.2
2vxw	-7.2
2gvf	-7.2
4mze	-7.1
4jpk	-7.1
4ipz	-7.1
4dmn	-7.1
4dkr	-7.1
4c1w	-7.1
4b8e	-7.1
3sv8	-7.1
3sv7	-7.1
3su2	-7.1
3su1	-7.1
3p8o	-7.1
2ztz	-7.1
2zol	-7.1
1qz8	-7.1
1f08	-7.1
4nwk	-7
3uqi	-7
3uqi	-7
3su3	-7
3su2	-7
3su0	-7
3su0	-7
3s12	-7
3d0i	-7
2yka	-7
1b50	-7
4gye	-6.9
4gye	-6.9
4eqj	-6.9
4ejd	-6.9
3sv6	-6.9
3su6	-6.9
3sit	-6.9
4oyd	-6.8
4b8e	-6.8
3vie	-6.8
3su4	-6.8
3su4	-6.8
2me4	-6.8
4gv9	-6.7
4dgb	-6.7
4b8e	-6.7
2yol	-6.7
2yol	-6.7
2yhf	-6.7
4g9d	-6.6
3sud	-6.6
3su5	-6.6
3su5	-6.6
3b71	-6.6
3b71	-6.6
3a07	-6.6
2wfo	-6.6
2q7c	-6.6
2q7c	-6.6
4ipz	-6.5
4ejk	-6.5
4c1w	-6.5
3su5	-6.5
2yhh	-6.5
2y1s	-6.5
2wfo	-6.5
4ejr	-6.4
3kmq	-6.4
2v6q	-6.4
2q7c	-6.4
4mod	-6.3
4mod	-6.3
4epj	-6.3
4ekx	-6.3
3sv7	-6.3
3sug	-6.3
3sug	-6.3
2q5u	-6.3
2q5u	-6.3
2q5u	-6.3
2q5u	-6.3
1zsd	-6.3
4nwl	-6.2
4i33	-6.2
3suf	-6.2
3rkc	-6.2
3avc	-6.2
2q5u	-6.2
2q5u	-6.2
2me2	-6.2
2m3l	-6.2
3zd0	-6.1
2zu3	-6.1
1z8r	-6.1
1qr9	-6.1
4g8i	-6
3avj	-6
4b4n	-5.9
2l2f	-5.9
2c86	-5.9
2c3a	-5.9
4adq	-5.8
3avk	-5.8
4b4n	-5.7
4g8i	-5.6
4adq	-5.6
3avn	-5.6
3sue	-5.4
3giv	-5.4
3kqk	-5.3
2vxj	-5.3
3iyp	-5.2
2x9m	-5.2
2x5i	-5.2
3i6k	-5.1
4uo4	-5
3vtt	-5
3vtt	-5
2mkr	-5
1qr8	-4.9
3j23	-4.7
3vie	-4.6
3j22	-4.4
2m3m	-4.3
2me3	-4.2
4ep2	-3.7
4ep2	-3.7
4qhm	-3
4epj	-3
2l3h	-2.6
4dge	-1.8
2zsv	-1.3
2zsv	-1.1
4uoa	-0.6
4e0r	-0.5
3m5g	-0.4
4fqm	-0.3

## Sheet: Dolutegravir
PDB	Docking score
4cey	-11.3
3koa	-11.3
4g42	-11.1
4cdu	-11.1
3t3c	-11.1
3t3c	-11.1
4j4x	-11
4fvu	-11
3kql	-11
3kql	-11
4wm8	-10.9
4lsv	-10.9
4cdq	-10.9
3kql	-10.9
4cew	-10.8
1klm	-10.8
4g9z	-10.7
4g9z	-10.7
4cdx	-10.7
3nxu	-10.7
2uv0	-10.7
2uv0	-10.7
2uv0	-10.7
2uv0	-10.7
2uv0	-10.7
4cdw	-10.6
3vcl	-10.6
2wrg	-10.6
2wrg	-10.6
2wrg	-10.6
2wrg	-10.6
2wrg	-10.6
2uv0	-10.6
2uv0	-10.6
2uv0	-10.6
2uv0	-10.6
2uv0	-10.6
2uv0	-10.6
2uv0	-10.6
2htw	-10.6
4wm7	-10.5
4pv9	-10.5
4fnk	-10.5
4f3z	-10.5
3vcl	-10.5
3kna	-10.5
3fku	-10.5
3b0w	-10.5
2i4v	-10.5
4g43	-10.4
3u7s	-10.4
3u7s	-10.4
3rwd	-10.4
3kqn	-10.4
3kqn	-10.4
3kqn	-10.4
3hkw	-10.4
3cj3	-10.4
2wrh	-10.4
2bvp	-10.4
1hhk	-10.4
4e78	-10.3
4e78	-10.3
3ztj	-10.3
3s11	-10.3
3rwc	-10.3
3rwc	-10.3
3cj3	-10.3
2i4w	-10.3
2i4u	-10.3
2hty	-10.3
1syv	-10.3
4uo3	-10.2
4mkb	-10.2
4mk7	-10.2
4lkj	-10.2
4k7f	-10.2
4k7f	-10.2
4fqr	-10.2
4fqr	-10.2
4e76	-10.2
3r4b	-10.2
3pqy	-10.2
3lkh	-10.2
3lkh	-10.2
3i6l	-10.2
3cj5	-10.2
3bwa	-10.2
3bwa	-10.2
3bw9	-10.2
2wrf	-10.2
2hu0	-10.2
2hjk	-10.2
2gec	-10.2
2gec	-10.2
2axg	-10.2
4uo3	-10.1
4mka	-10.1
4gua	-10.1
4fnk	-10.1
3r4b	-10.1
3o4l	-10.1
3cj5	-10.1
3bew	-10.1
3bev	-10.1
2wre	-10.1
2i4x	-10.1
2hcs	-10.1
2bvo	-10.1
1r6a	-10.1
1p9u	-10.1
1hhj	-10.1
1hhi	-10.1
1hhh	-10.1
4unw	-10
4unw	-10
4u6h	-10
4rw4	-10
4qru	-10
4qru	-10
4q6r	-10
4o44	-10
4o4g	-10
4j4u	-10
4ej8	-10
3rwi	-10
3rwh	-10
3rwh	-10
3rwg	-10
3ok9	-10
3klv	-10
3hky	-10
3hkw	-10
3ciz	-10
3bw9	-10
2ygc	-10
2ygc	-10
2wrc	-10
2i4d	-10
1idb	-10
4uo5	-9.9
4uo5	-9.9
4uo5	-9.9
4uo3	-9.9
4uo3	-9.9
4uo3	-9.9
4uo2	-9.9
4uo2	-9.9
4uo2	-9.9
4uo2	-9.9
4uo2	-9.9
4uo0	-9.9
4uo0	-9.9
4uo0	-9.9
4uo0	-9.9
4uo0	-9.9
4uo0	-9.9
4uo0	-9.9
4uo0	-9.9
4uo0	-9.9
4uo0	-9.9
4uo0	-9.9
4uo0	-9.9
4uo0	-9.9
4uo0	-9.9
4uo0	-9.9
4uo0	-9.9
4uo0	-9.9
4rw4	-9.9
4q6r	-9.9
4mmr	-9.9
4mk9	-9.9
4mk8	-9.9
4g9f	-9.9
4ej8	-9.9
3se9	-9.9
3rwg	-9.9
3rwe	-9.9
3rwe	-9.9
3iyw	-9.9
3iyw	-9.9
3iyw	-9.9
3hkw	-9.9
3h2l	-9.9
3h2l	-9.9
3ggu	-9.9
3ggu	-9.9
2wre	-9.9
2wre	-9.9
2wre	-9.9
2wre	-9.9
2wre	-9.9
2wr3	-9.9
2wr1	-9.9
2wr0	-9.9
2wr0	-9.9
2wr0	-9.9
2wr0	-9.9
2wr0	-9.9
2hu4	-9.9
2hu4	-9.9
2hu4	-9.9
1oop	-9.9
1ida	-9.9
4uo7	-9.8
4uo7	-9.8
4uo7	-9.8
4uo7	-9.8
4uo7	-9.8
4uo7	-9.8
4uo2	-9.8
4uo0	-9.8
4unw	-9.8
4rw6	-9.8
4qrs	-9.8
4qrs	-9.8
4j4y	-9.8
4i2p	-9.8
4ejl	-9.8
4e5i	-9.8
3vbr	-9.8
3iyw	-9.8
3iyw	-9.8
3hky	-9.8
3h98	-9.8
3gsw	-9.8
3cj2	-9.8
3ciz	-9.8
2wr2	-9.8
2wr1	-9.8
2wr1	-9.8
1v3d	-9.8
1v3d	-9.8
1izi	-9.8
4uo8	-9.7
4pg2	-9.7
4j4w	-9.7
4j4s	-9.7
4g9f	-9.7
4ejl	-9.7
4e7a	-9.7
4e7a	-9.7
4e5e	-9.7
4cqw	-9.7
4cqv	-9.7
4cqu	-9.7
4cqr	-9.7
4bh2	-9.7
3h98	-9.7
3gsw	-9.7
3gsr	-9.7
3gso	-9.7
3ebj	-9.7
3cj4	-9.7
3cj4	-9.7
2hu4	-9.7
1n5a	-9.7
1izh	-9.7
4uo3	-9.6
4uo3	-9.6
4uo3	-9.6
4uo3	-9.6
4uo3	-9.6
4rw8	-9.6
4mka	-9.6
4mk8	-9.6
4m8x	-9.6
4j6r	-9.6
4j4v	-9.6
4i2p	-9.6
4fqj	-9.6
4eee	-9.6
4cqz	-9.6
4cqu	-9.6
4bgw	-9.6
3kqh	-9.6
3gso	-9.6
2wr4	-9.6
2wa1	-9.6
4uny	-9.5
4rw7	-9.5
4qhk	-9.5
4mze	-9.5
4mze	-9.5
4m8y	-9.5
4m8y	-9.5
4m8x	-9.5
4jkp	-9.5
4j4v	-9.5
4i7f	-9.5
4i2q	-9.5
4cqu	-9.5
3se8	-9.5
3se8	-9.5
3nf8	-9.5
3nf8	-9.5
3nf6	-9.5
3nf6	-9.5
3mlh	-9.5
3iyw	-9.5
2ygb	-9.5
2ygb	-9.5
2wr2	-9.5
1quv	-9.5
main_protease	-9.4
4mmu	-9.4
4mms	-9.4
4mgu	-9.4
4m30	-9.4
4jkp	-9.4
4j4v	-9.4
4j4v	-9.4
4j4r	-9.4
4cqz	-9.4
4bgw	-9.4
4adf	-9.4
4adf	-9.4
4adf	-9.4
4adf	-9.4
4adf	-9.4
4adf	-9.4
4a92	-9.4
3nf9	-9.4
3nf9	-9.4
3nf7	-9.4
3nf7	-9.4
3gsr	-9.4
3gsq	-9.4
3gsq	-9.4
2wr7	-9.4
2wr2	-9.4
1v3e	-9.4
1v3e	-9.4
1v3c	-9.4
1v2i	-9.4
1a41	-9.4
4rw9	-9.3
4mkb	-9.3
4lsr	-9.3
4j4v	-9.3
4eq0	-9.3
4e5l	-9.3
4dag	-9.3
4cqu	-9.3
4bh0	-9.3
3vbo	-9.3
3tie	-9.3
3tie	-9.3
3tid	-9.3
3sdy	-9.3
3nfa	-9.3
3nfa	-9.3
3ku5	-9.3
3iyp	-9.3
3cj2	-9.3
3avc	-9.3
2x5i	-9.3
2vvw	-9.3
1v3c	-9.3
1v3b	-9.3
1v3b	-9.3
1v2i	-9.3
5ajm	-9.2
5ajm	-9.2
4unx	-9.2
4unx	-9.2
4unx	-9.2
4unx	-9.2
4mg3	-9.2
4lkk	-9.2
4kpq	-9.2
4hkj	-9.2
4cqp	-9.2
4bac	-9.2
4a92	-9.2
3zp0	-9.2
3tid	-9.2
3sdy	-9.2
3sdy	-9.2
3ku5	-9.2
3ku3	-9.2
3d0g	-9.2
3cpl	-9.2
3cj0	-9.2
3cj0	-9.2
3avg	-9.2
3avb	-9.2
2vvw	-9.2
5ajm	-9.1
4qru	-9.1
4opa	-9.1
4mk9	-9.1
4mg3	-9.1
4lst	-9.1
4kps	-9.1
4j4s	-9.1
4gag	-9.1
4gag	-9.1
4egt	-9.1
4e5g	-9.1
3zp3	-9.1
3oah	-9.1
3ku6	-9.1
3ku6	-9.1
3gsx	-9.1
3gsx	-9.1
3d0i	-9.1
3cpl	-9.1
3avb	-9.1
3alz	-9.1
2xwy	-9.1
2vvx	-9.1
2ht5	-9.1
1v3c	-9.1
1v3c	-9.1
1b50	-9.1
5ajm	-9
4pv9	-9
4mk7	-9
4gaj	-9
4gaj	-9
4fp8	-9
3n0i	-9
3n0i	-9
3gsu	-9
3gsu	-9
3d0h	-9
3avh	-9
2vvx	-9
1yh3	-9
4qrt	-8.9
4pv9	-8.9
4mza	-8.9
4mza	-8.9
4g8g	-8.9
4g8g	-8.9
4fqv	-8.9
4fqv	-8.9
4fp8	-8.9
4ffz	-8.9
4eq0	-8.9
4e91	-8.9
4e5f	-8.9
4bgx	-8.9
3zp6	-8.9
3zp1	-8.9
3su6	-8.9
3nf8	-8.9
3nf8	-8.9
3mj5	-8.9
3mj5	-8.9
3gsv	-8.9
3d23	-8.9
3bwa	-8.9
2zu4	-8.9
2xra	-8.9
2mgu	-8.9
1n59	-8.9
5ajm	-8.8
4qhn	-8.8
4mj1	-8.8
4mj0	-8.8
4mds	-8.8
4jo8	-8.8
4i2q	-8.8
4gv3	-8.8
4g9d	-8.8
4f3i	-8.8
4e5j	-8.8
4dgd	-8.8
4cqu	-8.8
4bgy	-8.8
3v3m	-8.8
3oah	-8.8
3ku3	-8.8
3gsv	-8.8
3avh	-8.8
2oy0	-8.8
1rzj	-8.8
4mds	-8.7
4jpk	-8.7
4gv3	-8.7
4cqp	-8.7
3zpa	-8.7
3v3m	-8.7
3rki	-8.7
3lqa	-8.7
3gsn	-8.7
3d23	-8.7
3ava	-8.7
3ava	-8.7
2z35	-8.7
2xi5	-8.7
2xi5	-8.7
2wh6	-8.7
2oy0	-8.7
2c36	-8.7
2c36	-8.7
1sk7	-8.7
1pk0	-8.7
4fqi	-8.6
4fqi	-8.6
4dgd	-8.6
4dga	-8.6
4dga	-8.6
4cqx	-8.6
4cqr	-8.6
4cqp	-8.6
4cqp	-8.6
4cqp	-8.6
4cqp	-8.6
4bgz	-8.6
3zp2	-8.6
3nwa	-8.6
3nf7	-8.6
3nf7	-8.6
3ifu	-8.6
3i6g	-8.6
3avj	-8.6
2hfz	-8.6
spike_RBD	-8.5
4uo6	-8.5
4uo6	-8.5
4oyd	-8.5
4fqy	-8.5
4fqy	-8.5
4fqi	-8.5
4fb3	-8.5
4f3i	-8.5
4ejk	-8.5
4ejk	-8.5
4ejk	-8.5
4cqy	-8.5
4cqq	-8.5
4cqq	-8.5
3zpb	-8.5
3zpb	-8.5
3s13	-8.5
3nwa	-8.5
3avl	-8.5
2x83	-8.5
1rzk	-8.5
4qhl	-8.4
4jb9	-8.4
4gve	-8.4
4cr0	-8.4
4cqq	-8.4
4bgx	-8.4
3ztn	-8.4
3u82	-8.4
3u82	-8.4
3su1	-8.4
3avn	-8.4
3avb	-8.4
3avb	-8.4
3ava	-8.4
3ava	-8.4
3alx	-8.4
2yol	-8.4
2yol	-8.4
2x83	-8.4
2htu	-8.4
5ajm	-8.3
4gzf	-8.3
4gzf	-8.3
4e92	-8.3
4bh2	-8.3
3suf	-8.3
3su0	-8.3
3nfa	-8.3
3nfa	-8.3
3nf9	-8.3
2axf	-8.3
2axf	-8.3
1r6a	-8.3
4qrt	-8.2
4mmv	-8.2
4i31	-8.2
4i31	-8.2
4g9d	-8.2
4e92	-8.2
4dgc	-8.2
4dgc	-8.2
4dgc	-8.2
4cqu	-8.2
4cqs	-8.2
4cqs	-8.2
4bh4	-8.2
4bh4	-8.2
4bh4	-8.2
4bh4	-8.2
4bh1	-8.2
4bh1	-8.2
4bh1	-8.2
3nf9	-8.2
3avg	-8.2
2zu5	-8.2
2iph	-8.2
2ghw	-8.2
2ge7	-8.2
4pv8	-8.1
4pv8	-8.1
4eqj	-8.1
4ep3	-8.1
4ep3	-8.1
4dkr	-8.1
4dgc	-8.1
4dgc	-8.1
4dgc	-8.1
4co6	-8.1
4bh3	-8.1
4bh3	-8.1
4bh3	-8.1
4bh3	-8.1
3vbh	-8.1
3vbf	-8.1
3vbf	-8.1
3ro5	-8.1
3kmq	-8.1
3avf	-8.1
1sys	-8.1
4lsu	-8
4lsu	-8
4i32	-8
4g8i	-8
4dkp	-8
3sv8	-8
3sud	-8
3su2	-8
3kms	-8
2iph	-8
2iph	-8
2hcn	-8
1f08	-8
4uo4	-7.9
4qrt	-7.9
4oph	-7.9
4mmt	-7.9
4jpj	-7.9
4gye	-7.9
4gye	-7.9
3uf5	-7.9
3su0	-7.9
3rwj	-7.9
3rwj	-7.9
3nwf	-7.9
2vvy	-7.9
1p9s	-7.9
1b53	-7.9
4gv9	-7.8
4ejd	-7.8
4ejd	-7.8
4ejd	-7.8
4ejd	-7.8
4ejd	-7.8
4dkq	-7.8
4dko	-7.8
3sis	-7.8
3nw8	-7.8
3nf6	-7.8
3nf6	-7.8
3avn	-7.8
2iph	-7.8
2c7u	-7.8
1rv7	-7.8
4mj1	-7.7
4ejd	-7.7
4dgb	-7.7
3su2	-7.7
3su2	-7.7
3sis	-7.7
3s12	-7.7
3rwi	-7.7
3p8o	-7.7
3p8n	-7.7
3avl	-7.7
4dgb	-7.6
3uqi	-7.6
3avk	-7.6
2bvq	-7.6
1rq9	-7.6
4iv3	-7.5
4g8i	-7.5
3sud	-7.5
3m5i	-7.5
3m5h	-7.5
3gzf	-7.5
3alw	-7.5
2xya	-7.5
2wh6	-7.5
2wfo	-7.5
2ge8	-7.5
2ca1	-7.5
4uoa	-7.4
4c1w	-7.4
3uqi	-7.4
3su3	-7.4
3su3	-7.4
3sit	-7.4
3sit	-7.4
3sit	-7.4
3sit	-7.4
3sit	-7.4
3sit	-7.4
3rwf	-7.4
3rwf	-7.4
3gsw	-7.4
2xze	-7.4
2lsp	-7.4
1z8r	-7.4
1rpi	-7.4
1qz8	-7.4
papain_protease	-7.3
4mj0	-7.3
4iv1	-7.3
4ffy	-7.3
4ekx	-7.3
4ejd	-7.3
4ejd	-7.3
4ejd	-7.3
4dmn	-7.3
4dmn	-7.3
3vie	-7.3
3sug	-7.3
3sug	-7.3
3sue	-7.3
2zu1	-7.3
2yka	-7.3
2xpx	-7.3
2xpx	-7.3
2q7c	-7.3
2q7c	-7.3
2q7c	-7.3
2ghv	-7.3
1rpi	-7.3
3sv7	-7.2
3sv7	-7.2
3su1	-7.2
3avc	-7.2
2xze	-7.2
2wfo	-7.2
2v6q	-7.2
4oyd	-7.1
4nwk	-7.1
4lss	-7.1
4c1w	-7.1
4b8e	-7.1
4b8e	-7.1
4b8e	-7.1
3sv9	-7.1
3sv9	-7.1
3su6	-7.1
2zty	-7.1
3w39	-7
3a07	-7
2zu3	-7
2vxw	-7
1qr9	-7
1qr8	-7
4lsp	-6.9
4g2k	-6.9
3sv6	-6.9
2yhf	-6.9
2me2	-6.9
2gvf	-6.9
4g2k	-6.8
3sv6	-6.8
3su5	-6.8
3m5g	-6.8
4nwl	-6.7
3su5	-6.7
2ztz	-6.7
2zol	-6.7
2yhh	-6.7
2y1s	-6.7
2q7c	-6.7
2q7c	-6.7
4b4n	-6.6
4b4n	-6.6
3avj	-6.6
2q7c	-6.6
2q5u	-6.6
2q5u	-6.6
2q5u	-6.6
2q5u	-6.6
2q5u	-6.6
2q5u	-6.6
1zsd	-6.6
4mod	-6.5
4mod	-6.5
4lkh	-6.5
3vie	-6.5
3su5	-6.5
3rkc	-6.5
3avk	-6.5
2g69	-6.5
2g69	-6.5
4nwk	-6.4
4i33	-6.4
3b71	-6.4
3b71	-6.4
2l2f	-6.4
4epj	-6.3
3u83	-6.3
3su4	-6.3
4ipz	-6.2
4ipz	-6.2
4ipz	-6.2
4ipz	-6.2
4ipz	-6.2
4ipz	-6.2
4ipz	-6.2
4ipz	-6.2
4ipz	-6.2
4ipz	-6.2
3u83	-6.2
3su4	-6.2
4ipz	-6.1
4ipz	-6.1
4epj	-6
2c3a	-6
2m3l	-5.9
2vxj	-5.8
2c86	-5.8
4ejr	-5.6
2me4	-5.6
2me3	-5.6
3giv	-5.5
2m3m	-5.5
4adq	-5.4
3kqk	-5.4
2x9m	-5.4
4adq	-5.3
3zd0	-5.3
3vtt	-5.3
3vtt	-5.3
2mkr	-5.3
3m5j	-5.1
4ep2	-5
3i6k	-4.9
4ep2	-4.7
1hhg	-4.7
3j23	-4.5
3j22	-4.5
4lcx	-4.4
4lki	-3.9
2l3h	-3.9
4qhm	-3.3
2jw8	-3
4g1g	-2.8
3vu5	-2.7
4gu4	-2
4gu4	-2
4gu4	-2
4gu4	-2
4gu4	-2
4gu4	-2
3vu5	-2
1knz	-2
4kom	-1.7
4dge	-1.6
4gu3	-1.4
4gu3	-1.4
4gu3	-1.4
4gu3	-1.4
4gu3	-1.4
4gu3	-1.4
4gu3	-1.4
4gu3	-1.4
4gu3	-1.4
4gu3	-1.4
4gu3	-1.4
4gu3	-1.4
4g1o	-1.3
2zsv	-1.3
2zsv	-1.1
4kol	-1
4e0r	-0.7
4fqm	-0.1

## Sheet: Conivaptan
PDB	Docking score
4wm7	-13.9
3b0w	-13.1
3nxu	-12.7
4f3z	-12.3
4mmr	-11.9
3bw9	-11.9
1idb	-11.9
3bwa	-11.8
4m8y	-11.7
4m8y	-11.7
4m8x	-11.7
4m8x	-11.7
3r4b	-11.7
3bwa	-11.7
3bw9	-11.7
2wr1	-11.7
2wr1	-11.7
2i4x	-11.7
2hjk	-11.7
2hcs	-11.7
2bvp	-11.7
2bvo	-11.7
1syv	-11.7
1klm	-11.7
3rwd	-11.6
3kqh	-11.6
2wrc	-11.6
1hhj	-11.6
4g42	-11.5
2wrg	-11.5
2wrg	-11.5
2wrg	-11.5
2wrg	-11.5
1hhk	-11.5
4j4v	-11.4
4j4v	-11.4
4j4v	-11.4
4j4v	-11.4
4j4v	-11.4
3gso	-11.4
3gso	-11.4
2wrg	-11.4
4k7f	-11.3
2i4u	-11.3
2gec	-11.3
4qru	-11.2
4qrs	-11.2
4k7f	-11.2
4fnk	-11.2
3t3c	-11.2
3rwi	-11.2
3kqn	-11.2
3kqn	-11.2
3kqn	-11.2
3gsr	-11.2
3fku	-11.2
2wr3	-11.2
2gec	-11.2
2axg	-11.2
1hhh	-11.2
4unx	-11.1
4unx	-11.1
4unx	-11.1
4unx	-11.1
4qru	-11.1
4j4u	-11.1
4i2p	-11.1
4i2p	-11.1
4fqr	-11.1
4fqr	-11.1
3vcl	-11.1
3u7s	-11.1
3t3c	-11.1
3rwe	-11.1
3rwe	-11.1
3rwc	-11.1
3rwc	-11.1
3gsw	-11.1
3ggu	-11.1
1r6a	-11.1
1hhi	-11.1
4uo3	-11
4uo3	-11
4uo3	-11
4uo3	-11
4uo3	-11
4rw8	-11
4rw7	-11
4j4x	-11
4j4w	-11
4g9f	-11
4cdu	-11
4bh0	-11
3u7s	-11
3lkh	-11
3lkh	-11
3i6l	-11
3gsw	-11
2i4d	-11
4unw	-10.9
4unw	-10.9
4qrs	-10.9
3vcl	-10.9
3rwh	-10.9
3rwh	-10.9
3iyw	-10.9
3iyw	-10.9
3iyw	-10.9
3iyw	-10.9
3iyw	-10.9
3iyw	-10.9
3gsq	-10.9
2xi5	-10.9
2xi5	-10.9
4uo5	-10.8
4unw	-10.8
4q6r	-10.8
4q6r	-10.8
4o44	-10.8
4ej8	-10.8
4bac	-10.8
3s11	-10.8
3pqy	-10.8
3gsq	-10.8
2wrh	-10.8
2wr1	-10.8
4rw4	-10.7
4pg2	-10.7
4mka	-10.7
4mk8	-10.7
4j4y	-10.7
4ejl	-10.7
4ejl	-10.7
4ej8	-10.7
4e7a	-10.7
4e7a	-10.7
4adf	-10.7
4adf	-10.7
4adf	-10.7
4adf	-10.7
4adf	-10.7
4adf	-10.7
4a92	-10.7
3ztj	-10.7
3rki	-10.7
1p9u	-10.7
1izi	-10.7
4uny	-10.6
4mk8	-10.6
4cdq	-10.6
4a92	-10.6
3vbr	-10.6
3vbo	-10.6
3tid	-10.6
3r4b	-10.6
3n0i	-10.6
3n0i	-10.6
3hkw	-10.6
3hkw	-10.6
3h98	-10.6
3bev	-10.6
2i4w	-10.6
2i4v	-10.6
4uo0	-10.5
4uo0	-10.5
4uo0	-10.5
4uo0	-10.5
4uo0	-10.5
4uo0	-10.5
4uo0	-10.5
4uo0	-10.5
4lsr	-10.5
4cey	-10.5
4cew	-10.5
4cdx	-10.5
4cdw	-10.5
3tid	-10.5
3koa	-10.5
3hkw	-10.5
3h98	-10.5
3h2l	-10.5
3h2l	-10.5
3cj2	-10.5
2wr0	-10.5
2wr0	-10.5
2wr0	-10.5
2wr0	-10.5
4uo5	-10.4
4uo5	-10.4
4uo0	-10.4
4mk9	-10.4
4fnk	-10.4
4e5e	-10.4
3se8	-10.4
3rwg	-10.4
2wa1	-10.4
1v3d	-10.4
1v3d	-10.4
1a41	-10.4
4uo0	-10.3
4uo0	-10.3
4uo0	-10.3
4mkb	-10.3
4j4s	-10.3
4j4s	-10.3
4gua	-10.3
3se8	-10.3
3rwg	-10.3
3ku3	-10.3
3cj5	-10.3
3cj2	-10.3
1quv	-10.3
1ida	-10.3
4wm8	-10.2
4uo0	-10.2
4uo0	-10.2
4uo0	-10.2
4rw4	-10.2
4mka	-10.2
4mk7	-10.2
4lsv	-10.2
4g43	-10.2
4e78	-10.2
4e78	-10.2
3tie	-10.2
3tie	-10.2
3kql	-10.2
3kql	-10.2
3hky	-10.2
3cj5	-10.2
3cj3	-10.2
3bew	-10.2
2vvx	-10.2
2vvx	-10.2
1izh	-10.2
4uo7	-10.1
4uo2	-10.1
4uo2	-10.1
4uo0	-10.1
4uo0	-10.1
4uo0	-10.1
4rw9	-10.1
4mkb	-10.1
4mk7	-10.1
4mgu	-10.1
4fqj	-10.1
4e5g	-10.1
3ok9	-10.1
3cj0	-10.1
2ygb	-10.1
2ygb	-10.1
4uo7	-10
4uo7	-10
4uo7	-10
4uo7	-10
4uo7	-10
4uo2	-10
4uo2	-10
4e76	-10
4cqv	-10
3kna	-10
3ebj	-10
3d23	-10
3d23	-10
3cj4	-10
3cj4	-10
2ygc	-10
2ygc	-10
2wre	-10
2wre	-10
1b53	-10
4uo2	-9.9
4uo2	-9.9
4qhk	-9.9
4pv9	-9.9
4j4r	-9.9
4fqy	-9.9
4fqy	-9.9
3cj3	-9.9
3cj0	-9.9
4rw6	-9.8
4pv9	-9.8
4mk9	-9.8
4jb9	-9.8
4e5f	-9.8
4cqq	-9.8
3se9	-9.8
3hky	-9.8
3ggu	-9.8
3d0g	-9.8
3ciz	-9.8
3alz	-9.8
2wr7	-9.8
2wr2	-9.8
2wr2	-9.8
2wr2	-9.8
2hu4	-9.8
2hu4	-9.8
2hu4	-9.8
2hu4	-9.8
1n5a	-9.8
4uo6	-9.7
4lst	-9.7
4cqq	-9.7
3ciz	-9.7
2wre	-9.7
1v3c	-9.7
1v3c	-9.7
1rzj	-9.7
4qhn	-9.6
4gaj	-9.6
4gaj	-9.6
4fqi	-9.6
4dag	-9.6
4cqw	-9.6
3zp2	-9.6
3u82	-9.6
4qhl	-9.5
4gag	-9.5
4gag	-9.5
4fp8	-9.5
4cqz	-9.5
3u82	-9.5
3kql	-9.5
3cpl	-9.5
5ajm	-9.4
5ajm	-9.4
5ajm	-9.4
4mza	-9.4
4mza	-9.4
4mj0	-9.4
4j6r	-9.4
4egt	-9.4
4cqz	-9.4
4cqx	-9.4
4cqq	-9.4
3zpb	-9.4
3zpb	-9.4
3zp1	-9.4
3vbh	-9.4
3klv	-9.4
3d0h	-9.4
3cpl	-9.4
3alx	-9.4
2vvw	-9.4
2c36	-9.4
2c36	-9.4
5ajm	-9.3
4uo6	-9.3
4uo3	-9.3
4uo3	-9.3
4o4g	-9.3
4mds	-9.3
4mds	-9.3
4jo8	-9.3
3mlh	-9.3
3avf	-9.3
2wrf	-9.3
2wre	-9.3
2wr4	-9.3
2oy0	-9.3
2hty	-9.3
4mmu	-9.2
4g9f	-9.2
4g8g	-9.2
4fqi	-9.2
4fqi	-9.2
4e5j	-9.2
4cqr	-9.2
4co6	-9.2
4bgx	-9.2
3ku6	-9.2
3ku6	-9.2
3ifu	-9.2
2x83	-9.2
2vvw	-9.2
2hu0	-9.2
1r6a	-9.2
4uo3	-9.1
4opa	-9.1
4mj1	-9.1
4mg3	-9.1
4mg3	-9.1
4g8g	-9.1
4fp8	-9.1
4e91	-9.1
4dgd	-9.1
4cqr	-9.1
4bh1	-9.1
4bh1	-9.1
4bgw	-9.1
3zp3	-9.1
3oah	-9.1
3nfa	-9.1
3ku3	-9.1
3i6g	-9.1
3gsv	-9.1
2xwy	-9.1
2xra	-9.1
2oy0	-9.1
2ht5	-9.1
1v3b	-9.1
4uo3	-9
4uo3	-9
4pv8	-9
4kpq	-9
4i2q	-9
4e5l	-9
4cr0	-9
4cqs	-9
4bh1	-9
4bgy	-9
4bgx	-9
3nfa	-9
3nf6	-9
3nf6	-9
3gsv	-9
2wre	-9
2wre	-9
2uv0	-9
2uv0	-9
2uv0	-9
2uv0	-9
2uv0	-9
2uv0	-9
2uv0	-9
2uv0	-9
2uv0	-9
2uv0	-9
2uv0	-9
2uv0	-9
2ghw	-9
4pv8	-8.9
4mj1	-8.9
4kps	-8.9
4g9z	-8.9
4ffz	-8.9
4dkq	-8.9
4cqs	-8.9
4bgw	-8.9
3s13	-8.9
3ku5	-8.9
3ku5	-8.9
1v3e	-8.9
1sys	-8.9
5ajm	-8.8
4mj0	-8.8
4iv3	-8.8
4fqv	-8.8
4cqu	-8.8
4cqu	-8.8
4cqp	-8.8
4cqp	-8.8
4cqp	-8.8
4cqp	-8.8
4cqp	-8.8
4cqp	-8.8
4bgz	-8.8
3zpa	-8.8
3sdy	-8.8
3sdy	-8.8
3lqa	-8.8
2htw	-8.8
1sk7	-8.8
5ajm	-8.7
4u6h	-8.7
4m30	-8.7
4i7f	-8.7
4fqv	-8.7
4f3i	-8.7
4cqy	-8.7
4cqu	-8.7
4cqu	-8.7
4cqu	-8.7
4cqu	-8.7
4bh2	-8.7
4bh2	-8.7
3nwf	-8.7
3nw8	-8.7
2x83	-8.7
1v2i	-8.7
1v2i	-8.7
4lsu	-8.6
4f3i	-8.6
4b8e	-8.6
4b8e	-8.6
3zp0	-8.6
3sv6	-8.6
3oah	-8.6
3avh	-8.6
1v3e	-8.6
1p9s	-8.6
4qru	-8.5
4lsu	-8.5
4ep3	-8.5
4ep3	-8.5
4b8e	-8.5
3nf9	-8.5
3nf9	-8.5
3avg	-8.5
3ava	-8.5
3ava	-8.5
2zu5	-8.5
2z35	-8.5
2htu	-8.5
1pk0	-8.5
main_protease	-8.4
4g9z	-8.4
3ztn	-8.4
3sdy	-8.4
3ro5	-8.4
3nf9	-8.4
3nf9	-8.4
3nf7	-8.4
3nf7	-8.4
3avh	-8.4
3avc	-8.4
1rv7	-8.4
papain_protease	-8.3
4uo8	-8.3
4qrt	-8.3
4pv9	-8.3
4mmv	-8.3
4gve	-8.3
4e5i	-8.3
3zp6	-8.3
3nf8	-8.3
3nf8	-8.3
3nf7	-8.3
3nf7	-8.3
3avb	-8.3
3avb	-8.3
3avb	-8.3
3ava	-8.3
3ava	-8.3
2xze	-8.3
2v6q	-8.3
4i32	-8.2
4dko	-8.2
4dgd	-8.2
3sv9	-8.2
3su1	-8.2
3rwj	-8.2
3rwj	-8.2
3o4l	-8.2
3nwa	-8.2
3nwa	-8.2
3nfa	-8.2
3nfa	-8.2
3nf8	-8.2
3nf8	-8.2
3nf6	-8.2
3nf6	-8.2
3gsu	-8.2
3gsu	-8.2
3bwa	-8.2
3avl	-8.2
3avb	-8.2
2ge8	-8.2
1yh3	-8.2
1n59	-8.2
4qrt	-8.1
4oph	-8.1
4i31	-8.1
4i31	-8.1
3sv9	-8.1
3sv7	-8.1
3rwi	-8.1
3mj5	-8.1
3mj5	-8.1
3avl	-8.1
3avj	-8.1
2yka	-8.1
1v3c	-8.1
1v3c	-8.1
1v3b	-8.1
4mms	-8
4lkj	-8
4ffy	-8
4dkr	-8
3v3m	-8
3v3m	-8
3uf5	-8
3avg	-8
2hcn	-8
2ghv	-8
4jpk	-7.9
4i2q	-7.9
4hkj	-7.9
4fvu	-7.9
4fb3	-7.9
3vbf	-7.9
3vbf	-7.9
3sug	-7.9
3sug	-7.9
3su6	-7.9
3su5	-7.9
3su5	-7.9
3su5	-7.9
3gsx	-7.9
3gsx	-7.9
2zu4	-7.9
2zu1	-7.9
2q7c	-7.9
2q7c	-7.9
2q7c	-7.9
2mgu	-7.9
2ca1	-7.9
2axf	-7.9
4gzf	-7.8
4gzf	-7.8
4gv9	-7.8
4ejk	-7.8
3sv7	-7.8
2lsp	-7.8
2c7u	-7.8
1rq9	-7.8
1rpi	-7.8
1oop	-7.8
4lss	-7.7
4ejk	-7.7
4ejd	-7.7
4dkp	-7.7
3sit	-7.7
3sit	-7.7
3sit	-7.7
3sit	-7.7
3sit	-7.7
3sit	-7.7
3gsr	-7.7
2ztz	-7.7
2ge7	-7.7
1rpi	-7.7
spike_RBD	-7.6
4lsp	-7.6
4ipz	-7.6
4gv3	-7.6
4gv3	-7.6
4ejk	-7.6
4ejd	-7.6
4ejd	-7.6
4bh3	-7.6
4bh3	-7.6
4bh3	-7.6
4bh3	-7.6
3su1	-7.6
3rwf	-7.6
3rwf	-7.6
3d0i	-7.6
2xze	-7.6
2axf	-7.6
4mmt	-7.5
4ipz	-7.5
4ipz	-7.5
4ipz	-7.5
4ipz	-7.5
4dgc	-7.5
3uqi	-7.5
3uqi	-7.5
3sv8	-7.5
3su3	-7.5
3su3	-7.5
3su0	-7.5
3m5h	-7.5
2zty	-7.5
2wh6	-7.5
2gvf	-7.5
4uo4	-7.4
4iv1	-7.4
4dgc	-7.4
4dgc	-7.4
4dgc	-7.4
4dgc	-7.4
4dgc	-7.4
3sud	-7.4
3su6	-7.4
3su2	-7.4
3avn	-7.4
3alw	-7.4
2xya	-7.4
2iph	-7.4
2bvq	-7.4
4oyd	-7.3
4jkp	-7.3
4jkp	-7.3
4ipz	-7.3
4epj	-7.3
3sis	-7.3
3gzf	-7.3
3a07	-7.3
2vvy	-7.3
2me2	-7.3
1qz8	-7.3
1b50	-7.3
4ejd	-7.2
3sis	-7.2
3avk	-7.2
2iph	-7.2
4eq0	-7.1
4ejd	-7.1
4ejd	-7.1
4dmn	-7.1
3kmq	-7.1
2zol	-7.1
4jpj	-7
4gye	-7
4gye	-7
4eee	-7
4e92	-7
4e92	-7
4dmn	-7
4bh4	-7
4bh4	-7
4bh4	-7
4bh4	-7
3su2	-7
3su2	-7
3su0	-7
3rkc	-7
3gsw	-7
2yol	-7
2yol	-7
2wfo	-7
2q7c	-7
2q7c	-7
2q7c	-7
2c86	-7
4dgb	-6.9
4b4n	-6.9
4b4n	-6.9
3w39	-6.9
2vxw	-6.9
2g69	-6.9
2g69	-6.9
1rzk	-6.9
4nwl	-6.8
4eq0	-6.8
4dgb	-6.8
3b71	-6.8
3b71	-6.8
2yhh	-6.8
2wh6	-6.8
2q5u	-6.8
2q5u	-6.8
2q5u	-6.8
2q5u	-6.8
2q5u	-6.8
2q5u	-6.8
1z8r	-6.8
1qr9	-6.8
4ekx	-6.7
4dga	-6.7
4dga	-6.7
3vie	-6.7
3m5i	-6.7
2yhf	-6.7
2y1s	-6.7
2m3l	-6.7
4i33	-6.6
3s12	-6.6
3kms	-6.6
4oyd	-6.5
3p8n	-6.5
3avc	-6.5
2iph	-6.5
2iph	-6.5
4nwk	-6.4
3u83	-6.4
3u83	-6.4
3su4	-6.4
3su4	-6.4
2wfo	-6.4
2l2f	-6.4
4qrt	-6.3
4nwk	-6.3
3sv6	-6.3
2me4	-6.3
1f08	-6.3
4c1w	-6.2
3p8o	-6.2
2xpx	-6.2
2xpx	-6.2
2m3m	-6.2
4mze	-6.1
4mze	-6.1
4mod	-6.1
4ejd	-6.1
4ejd	-6.1
4ejd	-6.1
3sud	-6.1
3gsn	-6.1
2zu3	-6.1
2c3a	-6.1
4mod	-6
4ipz	-6
4g9d	-6
3giv	-6
3avj	-6
2hfz	-6
4ipz	-5.9
4ipz	-5.9
4ipz	-5.9
4ipz	-5.9
4g9d	-5.9
4g8i	-5.9
3avk	-5.9
1zsd	-5.9
4ipz	-5.8
4ejr	-5.8
2x9m	-5.8
4adq	-5.7
4adq	-5.7
2vxj	-5.7
4g8i	-5.6
4c1w	-5.6
3suf	-5.6
3sue	-5.6
3vtt	-5.4
3vtt	-5.4
3vie	-5.4
3i6k	-5.4
3avn	-5.4
4eqj	-5.3
3zd0	-5.3
3kqk	-5.3
4ep2	-5.2
2mkr	-5.2
2me3	-5.2
4ep2	-5.1
3j23	-5
3j22	-5
1qr8	-5
4epj	-4.4
4qhm	-3.5
2l3h	-3.3
4lcx	-2.7
4dge	-1.6
4lkk	-1.2
4g2k	-1
4g2k	-0.9
2zsv	-0.9
2zsv	-0.9
4e0r	-0.5
4fqm	-0.3

## Sheet: Velpatasvir
PDB	Docking score
4j4x	-13
4g42	-12.9
3alz	-12.8
2bvo	-12.6
3ztj	-12.4
3fku	-12.4
1hhj	-12.4
4qru	-12.3
3koa	-12.3
3bwa	-12.3
2hjk	-12.3
2axg	-12.3
1hhk	-12.3
4uo5	-12.2
4unw	-12.2
4qru	-12.2
4qrs	-12.2
2bvp	-12.2
1syv	-12.2
4uo7	-12.1
4uo5	-12.1
3rwi	-12.1
3bwa	-12.1
4uo7	-12
4qrs	-12
4o44	-12
4mk9	-12
4mk9	-12
3i6l	-12
2wrh	-12
2i4v	-12
4g9f	-11.9
3lkh	-11.9
3lkh	-11.9
3gso	-11.9
3bw9	-11.9
2wr1	-11.9
2wr1	-11.9
2wr1	-11.9
4uo7	-11.8
4uo7	-11.8
4uo0	-11.8
4uo0	-11.8
4uo0	-11.8
4uo0	-11.8
4uo0	-11.8
4uo0	-11.8
4unw	-11.8
4unw	-11.8
4rw8	-11.8
4j4v	-11.8
4j4v	-11.8
4j4v	-11.8
4e78	-11.8
3r4b	-11.8
3gsw	-11.8
3gso	-11.8
3bw9	-11.8
2wr0	-11.8
1hhi	-11.8
1hhh	-11.8
4uo7	-11.7
4uo3	-11.7
4uo2	-11.7
4uo0	-11.7
4uo0	-11.7
4uo0	-11.7
4rw9	-11.7
4j4v	-11.7
4j4v	-11.7
4e78	-11.7
4e7a	-11.7
4e7a	-11.7
3rwe	-11.7
3rwe	-11.7
3r4b	-11.7
3gsr	-11.7
4uo7	-11.6
4uo3	-11.6
4uo2	-11.6
3vcl	-11.6
3rwg	-11.6
3kqh	-11.6
2wrg	-11.6
2wrg	-11.6
2wrg	-11.6
2wrg	-11.6
4uo3	-11.5
4uo3	-11.5
4uo3	-11.5
4uo0	-11.5
4bh0	-11.5
3t3c	-11.5
3ok9	-11.5
3h2l	-11.5
3gsw	-11.5
3ciz	-11.5
2wrg	-11.5
2wre	-11.5
2i4u	-11.5
1izi	-11.5
4mkb	-11.4
4mkb	-11.4
4mka	-11.4
4mk8	-11.4
4k7f	-11.4
3t3c	-11.4
3rwc	-11.4
3gsq	-11.4
3ggu	-11.4
3cj2	-11.4
3bev	-11.4
2wre	-11.4
1izh	-11.4
4mka	-11.3
4mk8	-11.3
4j4y	-11.3
4a92	-11.3
4a92	-11.3
3vcl	-11.3
3s11	-11.3
3rwh	-11.3
3rwh	-11.3
3rwg	-11.3
3rwd	-11.3
3h2l	-11.3
2wre	-11.3
2wr4	-11.3
2wr2	-11.3
2wr2	-11.3
2wa1	-11.3
4uo5	-11.2
4uo2	-11.2
4cqv	-11.2
3u82	-11.2
3u82	-11.2
3rwc	-11.2
3ku6	-11.2
3ggu	-11.2
3cj5	-11.2
3ciz	-11.2
2wre	-11.2
2wr0	-11.2
2wr0	-11.2
2i4x	-11.2
1ida	-11.2
4m8y	-11.1
4k7f	-11.1
4j4u	-11.1
3ku6	-11.1
3h98	-11.1
3cj5	-11.1
3cj4	-11.1
3cj2	-11.1
2wr0	-11.1
2i4w	-11.1
2i4d	-11.1
1idb	-11.1
4mk7	-11
4m8x	-11
4gua	-11
3u7s	-11
3u7s	-11
3hkw	-11
3h98	-11
3cj4	-11
3cj3	-11
3cj0	-11
2wr0	-11
4wm8	-10.9
4uo6	-10.9
3hky	-10.9
3hkw	-10.9
3gsq	-10.9
3cj3	-10.9
3bew	-10.9
2ygc	-10.9
2wr2	-10.9
4m8x	-10.8
4ejl	-10.8
3hky	-10.8
3hkw	-10.8
3cj0	-10.8
2ygc	-10.8
1quv	-10.8
1klm	-10.8
4uo6	-10.7
4uo2	-10.7
4pv9	-10.7
4mk7	-10.7
4i2p	-10.7
2wre	-10.7
5ajm	-10.6
5ajm	-10.6
5ajm	-10.6
5ajm	-10.6
4uo0	-10.6
4m8y	-10.6
4jkp	-10.6
4j4w	-10.6
4g43	-10.6
4cqz	-10.6
4cqr	-10.6
4cqp	-10.6
4cqp	-10.6
3zp1	-10.6
3tid	-10.6
3kqn	-10.6
3cpl	-10.6
2wr7	-10.6
5ajm	-10.5
5ajm	-10.5
4wm7	-10.5
4uo0	-10.5
4pg2	-10.5
4opa	-10.5
4jkp	-10.5
4cqz	-10.5
4cqp	-10.5
4cqp	-10.5
4cqp	-10.5
4cqp	-10.5
4bgx	-10.5
4bgx	-10.5
4bgw	-10.5
4bgw	-10.5
3kqn	-10.5
3kqn	-10.5
3iyw	-10.5
3iyw	-10.5
3cpl	-10.5
2wre	-10.5
2vvw	-10.5
2vvw	-10.5
4uo3	-10.4
4uo2	-10.4
4uo0	-10.4
4uo0	-10.4
4uo0	-10.4
4jo8	-10.4
4j4r	-10.4
4i7f	-10.4
4gag	-10.4
4gag	-10.4
4fqi	-10.4
4cqq	-10.4
4cey	-10.4
3zpb	-10.4
3zp6	-10.4
3zp3	-10.4
3zp2	-10.4
3tie	-10.4
3tie	-10.4
3tid	-10.4
3ku3	-10.4
3iyw	-10.4
3iyw	-10.4
3iyw	-10.4
3iyw	-10.4
3d23	-10.4
3d23	-10.4
2ygb	-10.4
2wrf	-10.4
4uo0	-10.3
4uo0	-10.3
4qhk	-10.3
4lsr	-10.3
4j4s	-10.3
4gaj	-10.3
4gaj	-10.3
4fnk	-10.3
4f3z	-10.3
4ejl	-10.3
4cqs	-10.3
4cqs	-10.3
4cqr	-10.3
4cqq	-10.3
4cqq	-10.3
4co6	-10.3
4bgy	-10.3
3zpa	-10.3
3s13	-10.3
3mlh	-10.3
3ebj	-10.3
2ygb	-10.3
1p9u	-10.3
1n5a	-10.3
4uo3	-10.2
4uo3	-10.2
4uo3	-10.2
4uo0	-10.2
4unx	-10.2
4unx	-10.2
4unx	-10.2
4j4s	-10.2
4fqy	-10.2
4fqy	-10.2
4cqu	-10.2
4cqu	-10.2
3zp0	-10.2
2xwy	-10.2
1v2i	-10.2
4uo3	-10.1
4unx	-10.1
4ej8	-10.1
4cqu	-10.1
3zpb	-10.1
3n0i	-10.1
2xi5	-10.1
4uo2	-10
4pv9	-10
4i2p	-10
4fqj	-10
4cqu	-10
4cqu	-10
4bac	-10
3se9	-10
3sdy	-10
3sdy	-10
3kql	-10
3b0w	-10
2hcs	-10
4qhn	-9.9
4mj0	-9.9
4cqw	-9.9
4cqu	-9.9
4cdu	-9.9
3sdy	-9.9
3rki	-9.9
3nf8	-9.9
3kql	-9.9
3d0g	-9.9
1v3b	-9.9
1v2i	-9.9
1pk0	-9.9
4hkj	-9.8
4dag	-9.8
4cew	-9.8
3nf8	-9.8
3nf8	-9.8
3nf8	-9.8
1r6a	-9.8
4rw4	-9.7
4mmu	-9.7
4lsv	-9.7
4ej8	-9.7
4cdw	-9.7
3se8	-9.7
3kql	-9.7
3d0h	-9.7
2x83	-9.7
1a41	-9.7
4o4g	-9.6
4mj1	-9.6
4jb9	-9.6
4g9f	-9.6
4ffz	-9.6
4cr0	-9.6
4bgz	-9.6
3se8	-9.6
3nf6	-9.6
2uv0	-9.6
4mgu	-9.5
4fp8	-9.5
4fp8	-9.5
4cdx	-9.5
4adf	-9.5
3nf7	-9.5
3nf7	-9.5
3nf7	-9.5
3nf6	-9.5
3nf6	-9.5
3ku3	-9.5
3avl	-9.5
2uv0	-9.5
2uv0	-9.5
2uv0	-9.5
2uv0	-9.5
2uv0	-9.5
2uv0	-9.5
2uv0	-9.5
2uv0	-9.5
1v3b	-9.5
4mg3	-9.4
4kps	-9.4
4e76	-9.4
4cdq	-9.4
3nf7	-9.4
3nf6	-9.4
3ku5	-9.4
3ku5	-9.4
2xra	-9.4
2uv0	-9.4
4i2q	-9.3
4e5l	-9.3
4e5g	-9.3
3uf5	-9.3
3i6g	-9.3
4q6r	-9.2
4q6r	-9.2
3nfa	-9.2
3nfa	-9.2
3mj5	-9.2
2wrc	-9.2
2mgu	-9.2
4fnk	-9.1
4bh1	-9.1
4bh1	-9.1
2xi5	-9.1
2htw	-9.1
1v3e	-9.1
1v3e	-9.1
1rzj	-9.1
4rw7	-9
4qhl	-9
4g8g	-9
4g8g	-9
4bh1	-9
3nf9	-9
3mj5	-9
3ava	-9
2x83	-9
2wr3	-9
2hu4	-9
2hu0	-9
4mza	-8.9
3nf9	-8.9
3nf9	-8.9
3lqa	-8.9
3alx	-8.9
2ghw	-8.9
2gec	-8.9
1n59	-8.9
4rw4	-8.8
4qru	-8.8
4oyd	-8.8
4mza	-8.8
4mg3	-8.8
4fvu	-8.8
3nf9	-8.8
2vvx	-8.8
2vvx	-8.8
2hty	-8.8
2ghv	-8.8
1b50	-8.8
4pv9	-8.7
4mj0	-8.7
4gzf	-8.7
4e5f	-8.7
4e5e	-8.7
3rwi	-8.7
3n0i	-8.7
3ava	-8.7
2zu1	-8.7
2uv0	-8.7
2uv0	-8.7
2iph	-8.7
2iph	-8.7
4rw6	-8.6
4pv8	-8.6
4gzf	-8.6
2iph	-8.6
2iph	-8.6
2hu4	-8.6
1v3c	-8.6
1v3c	-8.6
1v3c	-8.6
4pv8	-8.5
4adf	-8.5
3nfa	-8.5
3nfa	-8.5
2z35	-8.5
2oy0	-8.5
2hu4	-8.5
1rq9	-8.5
4mds	-8.4
4fqv	-8.4
3avn	-8.4
3avj	-8.4
3avc	-8.4
2hu4	-8.4
2gec	-8.4
1b53	-8.4
4mds	-8.3
4f3i	-8.3
4e5j	-8.3
1v3d	-8.3
1v3c	-8.3
4lsp	-8.2
4fqv	-8.2
3kna	-8.2
2htu	-8.2
2hcn	-8.2
4mms	-8.1
4m30	-8.1
4lss	-8.1
4g9z	-8.1
4f3i	-8.1
3ztn	-8.1
3vbr	-8.1
3ro5	-8.1
2gvf	-8.1
4lkj	-8
4j6r	-8
4adf	-8
3avl	-8
1v3d	-8
spike_RBD	-7.9
main_protease	-7.9
4e91	-7.9
4dkq	-7.9
4dkp	-7.9
4dgb	-7.9
4adf	-7.9
3rwj	-7.9
3rwj	-7.9
3avg	-7.9
3avb	-7.9
1r6a	-7.9
4i2q	-7.8
4e92	-7.8
4dkr	-7.8
4dko	-7.8
4adf	-7.8
4adf	-7.8
2oy0	-7.8
4e92	-7.7
4bh4	-7.7
4bh4	-7.7
2ge8	-7.7
2bvq	-7.7
2axf	-7.7
4mmt	-7.6
4mj1	-7.6
4kpq	-7.6
3o4l	-7.6
3nxu	-7.6
3klv	-7.6
3gsw	-7.6
3avh	-7.6
3avb	-7.6
3ava	-7.6
3ava	-7.6
2yka	-7.6
2axf	-7.6
papain_protease	-7.5
4qrt	-7.5
4g9z	-7.5
4bh2	-7.5
3rwf	-7.5
3gsv	-7.5
2zu5	-7.5
1sys	-7.5
1qz8	-7.5
4gv3	-7.4
3avk	-7.4
3avb	-7.4
3avb	-7.4
2c7u	-7.4
4qrt	-7.3
4mze	-7.3
4dgd	-7.3
3rwf	-7.3
4e5i	-7.2
3su1	-7.2
3kmq	-7.2
3gsx	-7.2
3avh	-7.2
2zty	-7.2
2lsp	-7.2
4i33	-7.1
4fb3	-7.1
4dgd	-7.1
4bh3	-7.1
4bh2	-7.1
3vbh	-7.1
3su4	-7.1
3su4	-7.1
2ztz	-7.1
2vxw	-7.1
4qrt	-7
4bh3	-7
3vbo	-7
3s12	-7
3oah	-7
3gsv	-7
1rpi	-7
4gv3	-6.9
4dgb	-6.9
4bh3	-6.9
4bh3	-6.9
3w39	-6.9
3nwf	-6.9
3m5h	-6.9
3gsx	-6.9
3gsu	-6.9
2zol	-6.9
2wh6	-6.9
2ca1	-6.9
2c3a	-6.9
1sk7	-6.9
1f08	-6.9
4jpj	-6.8
3v3m	-6.8
3v3m	-6.8
3su2	-6.8
3nwa	-6.8
3nwa	-6.8
2ge7	-6.8
4mze	-6.7
4jpk	-6.7
2xya	-6.7
2g69	-6.7
3su2	-6.6
3su0	-6.6
3alw	-6.6
2yol	-6.6
2ht5	-6.6
2g69	-6.6
4dmn	-6.5
3sv8	-6.5
3gsu	-6.5
2yol	-6.5
2wh6	-6.5
1p9s	-6.5
4ejr	-6.4
4dmn	-6.4
4b4n	-6.4
3su6	-6.4
3su2	-6.4
3pqy	-6.4
4dgc	-6.3
4dgc	-6.3
4b4n	-6.2
3su3	-6.2
3gsr	-6.2
1rpi	-6.2
4bh4	-6.1
2q7c	-6.1
4i32	-6
4gye	-6
4gv9	-6
4dgc	-6
4dgc	-6
4dgc	-6
3vbf	-6
3b71	-6
3avj	-6
2zu4	-6
4mmr	-5.9
4bh4	-5.9
3su5	-5.9
3su5	-5.9
2q7c	-5.9
4oyd	-5.8
4fqi	-5.8
4ejd	-5.8
3vbf	-5.8
3gzf	-5.8
2q7c	-5.8
4dgc	-5.7
3sud	-5.7
3su1	-5.7
3avf	-5.7
4u6h	-5.6
4lst	-5.6
4fqi	-5.6
4ekx	-5.6
3su5	-5.6
2x9m	-5.6
2q5u	-5.6
2q5u	-5.6
2q5u	-5.6
2q5u	-5.6
2q5u	-5.6
4nwl	-5.5
3sv9	-5.5
2v6q	-5.5
2q7c	-5.5
4mmv	-5.4
4eq0	-5.4
3p8o	-5.4
2q7c	-5.4
3vie	-5.3
3sv7	-5.3
3sue	-5.3
3giv	-5.3
2xpx	-5.3
4i31	-5.2
3sv6	-5.2
3sv6	-5.2
3b71	-5.2
2xpx	-5.2
4b8e	-5.1
3sud	-5.1
3su3	-5.1
3d0i	-5.1
4nwk	-5
4cqx	-5
4b8e	-5
3sv9	-5
3sug	-5
3sug	-5
3p8n	-5
3ifu	-5
3i6k	-5
1rv7	-5
4nwk	-4.9
4ipz	-4.9
4i31	-4.9
4adq	-4.9
3suf	-4.9
3nw8	-4.9
3kqk	-4.9
2q7c	-4.9
2q5u	-4.9
4lsu	-4.8
4ipz	-4.8
4gve	-4.8
4adq	-4.8
3sv7	-4.8
2mkr	-4.8
4ejd	-4.7
4ejd	-4.7
4ffy	-4.6
2wfo	-4.6
2m3l	-4.6
4eq0	-4.5
3u83	-4.5
3u83	-4.5
1z8r	-4.5
4g8i	-4.4
2c86	-4.3
4ep3	-4.2
3su6	-4.2
4ep3	-4.1
3kms	-4.1
3gsn	-4.1
4b8e	-4
2yhf	-4
2c36	-4
1zsd	-4
2xze	-3.8
2vxj	-3.8
2c36	-3.8
4g8i	-3.7
4dga	-3.6
3j23	-3.6
3j22	-3.6
3avk	-3.6
4dga	-3.5
4eee	-3.4
3bwa	-3.4
4iv3	-3.2
3uqi	-3.2
2zu3	-3.2
4lsu	-3
4ejd	-2.9
4uo8	-2.5
4qhm	-2.4
2vvy	-2.4
3su0	-2.3
2wfo	-2.3
4egt	-2
3vtt	-1.8
4oph	-1.6
3sis	-1.5
4ipz	-1.2
4ipz	-1.2
4dge	-1.1
4ipz	-0.9
3m5i	-0.9
2zsv	-0.8
2zsv	-0.8
4ipz	-0.5
4fqr	-0.5
4e0r	-0.4
4cqy	-0.3
4fqr	-0.2

## Sheet: Lomitapide
PDB	Docking score
3fku	-12.7
3nxu	-12.4
3s11	-12.1
3b0w	-12.1
2wrg	-12.1
3ztj	-12
2wrg	-12
4wm8	-11.9
3t3c	-11.9
2wrg	-11.9
2wrg	-11.9
4wm7	-11.8
2wrg	-11.8
2hcs	-11.8
4i2p	-11.7
4o4g	-11.6
4g42	-11.6
3rwg	-11.6
4uo3	-11.5
4e5l	-11.5
4bac	-11.5
3rwg	-11.5
3cj3	-11.5
2bvp	-11.5
2bvo	-11.5
4rw4	-11.4
4mk8	-11.4
4j4u	-11.4
4f3z	-11.4
4e91	-11.4
3cj5	-11.4
2hu4	-11.4
2hu4	-11.4
2hu4	-11.4
4uo3	-11.3
4rw4	-11.3
4j4s	-11.3
4e5e	-11.3
3iyw	-11.3
3i6l	-11.3
3hkw	-11.3
3h2l	-11.3
3h2l	-11.3
3cj3	-11.3
2hu4	-11.3
2hjk	-11.3
2axg	-11.3
4q6r	-11.2
4mk9	-11.2
4j4w	-11.2
4i2p	-11.2
4gua	-11.2
4fqr	-11.2
4fqr	-11.2
4fnk	-11.2
3t3c	-11.2
3iyw	-11.2
3iyw	-11.2
3iyw	-11.2
3cj0	-11.2
4uo3	-11.1
4unx	-11.1
4qrs	-11.1
4mkb	-11.1
4mka	-11.1
4mka	-11.1
4i2q	-11.1
4dag	-11.1
4cqv	-11.1
3vcl	-11.1
3u7s	-11.1
3u7s	-11.1
3kql	-11.1
3kql	-11.1
3kql	-11.1
3iyw	-11.1
3iyw	-11.1
3gsq	-11.1
3d23	-11.1
3cj5	-11.1
3cj2	-11.1
4unx	-11
4unx	-11
4unx	-11
4unw	-11
4unw	-11
4rw8	-11
4qrs	-11
4q6r	-11
4j4s	-11
4g9f	-11
4bh0	-11
3se9	-11
3kqn	-11
3kqn	-11
3kqh	-11
3h98	-11
3h98	-11
3d23	-11
3cj2	-11
1ida	-11
4uo7	-10.9
4uo2	-10.9
4uo2	-10.9
4lsv	-10.9
4k7f	-10.9
3n0i	-10.9
3kqn	-10.9
3ggu	-10.9
3ciz	-10.9
3bwa	-10.9
3bw9	-10.9
2i4x	-10.9
2i4v	-10.9
4uo3	-10.8
4o44	-10.8
3vcl	-10.8
3lkh	-10.8
3gso	-10.8
3ciz	-10.8
3bwa	-10.8
3bw9	-10.8
2wre	-10.8
2i4w	-10.8
1syv	-10.8
1r6a	-10.8
1hhj	-10.8
4uo3	-10.7
4pv9	-10.7
4m30	-10.7
4lkj	-10.7
4j4x	-10.7
3koa	-10.7
3gsr	-10.7
3gsq	-10.7
3cj4	-10.7
3cj4	-10.7
3bew	-10.7
2wre	-10.7
1p9u	-10.7
1klm	-10.7
1izh	-10.7
4uo3	-10.6
4uo3	-10.6
4uo3	-10.6
4mk7	-10.6
4k7f	-10.6
4j4v	-10.6
4fnk	-10.6
4e7a	-10.6
4cew	-10.6
4adf	-10.6
3rwh	-10.6
3rwc	-10.6
3kna	-10.6
3hky	-10.6
3hky	-10.6
3cj0	-10.6
3alx	-10.6
4rw7	-10.5
4mk7	-10.5
4j4v	-10.5
4j4v	-10.5
4j4v	-10.5
4ej8	-10.5
4e7a	-10.5
4cey	-10.5
3rwh	-10.5
3rwd	-10.5
3rwc	-10.5
3r4b	-10.5
2i4d	-10.5
2hty	-10.5
4uo8	-10.4
4uo0	-10.4
4j6r	-10.4
4j4y	-10.4
4i2q	-10.4
4ej8	-10.4
4adf	-10.4
4adf	-10.4
3vbr	-10.4
3rwe	-10.4
3r4b	-10.4
3ok9	-10.4
3n0i	-10.4
3hkw	-10.4
3gso	-10.4
3ggu	-10.4
2wr3	-10.4
2vvw	-10.4
4uo0	-10.3
4uo0	-10.3
4uo0	-10.3
4uo0	-10.3
4rw9	-10.3
4mg3	-10.3
4m8x	-10.3
4lsu	-10.3
4lsu	-10.3
4g9z	-10.3
4ejl	-10.3
4e5j	-10.3
4adf	-10.3
4adf	-10.3
4adf	-10.3
2wrf	-10.3
2wre	-10.3
2wre	-10.3
2i4u	-10.3
4uo2	-10.2
4uo0	-10.2
4uo0	-10.2
4uo0	-10.2
4uo0	-10.2
4uo0	-10.2
4mkb	-10.2
4jo8	-10.2
4j4v	-10.2
4hkj	-10.2
4g43	-10.2
3vbo	-10.2
3rki	-10.2
2wre	-10.2
2wre	-10.2
2vvw	-10.2
4uo3	-10.1
4uo3	-10.1
4uo2	-10.1
4uo2	-10.1
4uny	-10.1
4pv9	-10.1
4mze	-10.1
4ejl	-10.1
3tid	-10.1
3tid	-10.1
3rwe	-10.1
3bev	-10.1
2wrc	-10.1
1pk0	-10.1
1idb	-10.1
4mze	-10
4mmr	-10
4mk9	-10
4mk8	-10
4mgu	-10
4jkp	-10
4i7f	-10
4fqi	-10
4cdu	-10
4cdq	-10
4bh2	-10
4a92	-10
1izi	-10
4uo7	-9.9
4uo2	-9.9
4uo0	-9.9
4uo0	-9.9
4uo0	-9.9
4uo0	-9.9
4rw6	-9.9
4m8y	-9.9
4jkp	-9.9
4g9z	-9.9
4fqj	-9.9
4cr0	-9.9
4bh2	-9.9
3zp2	-9.9
3cpl	-9.9
2ygc	-9.9
2ht5	-9.9
1v3d	-9.9
1rzj	-9.9
1n5a	-9.9
4uo7	-9.8
4uo7	-9.8
4unw	-9.8
4qhn	-9.8
4pv9	-9.8
4pg2	-9.8
4mza	-9.8
4m8x	-9.8
4lsr	-9.8
4e5f	-9.8
3tie	-9.8
3ebj	-9.8
3cpl	-9.8
3avg	-9.8
2wrh	-9.8
2wr0	-9.8
1v3d	-9.8
1hhi	-9.8
4uo0	-9.7
4mza	-9.7
4mds	-9.7
4mds	-9.7
4fvu	-9.7
4e5g	-9.7
4a92	-9.7
3u82	-9.7
3tie	-9.7
3lkh	-9.7
3avh	-9.7
2ygc	-9.7
2ygb	-9.7
2ygb	-9.7
2xra	-9.7
2wr0	-9.7
4uo0	-9.6
4uo0	-9.6
4mms	-9.6
4g8g	-9.6
4fqv	-9.6
4fqv	-9.6
4cqx	-9.6
4bh4	-9.6
3hkw	-9.6
3gsw	-9.6
2wr7	-9.6
2wr4	-9.6
2iph	-9.6
2hu0	-9.6
4uo7	-9.5
4uo7	-9.5
4uo6	-9.5
4opa	-9.5
4m8y	-9.5
4e78	-9.5
4e78	-9.5
4dgd	-9.5
4cqy	-9.5
4cdw	-9.5
3zp6	-9.5
3zp0	-9.5
3u82	-9.5
3lqa	-9.5
3i6g	-9.5
3gsw	-9.5
3d0h	-9.5
3avn	-9.5
3ava	-9.5
3ava	-9.5
2xi5	-9.5
2wr2	-9.5
2wr0	-9.5
2wr0	-9.5
2iph	-9.5
2iph	-9.5
2iph	-9.5
2gec	-9.5
1b53	-9.5
4qrt	-9.4
4cdx	-9.4
4bh3	-9.4
4bh3	-9.4
3rwi	-9.4
3oah	-9.4
3nf9	-9.4
3nf7	-9.4
3gsv	-9.4
3avl	-9.4
3avj	-9.4
3avh	-9.4
3ava	-9.4
2gec	-9.4
1hhh	-9.4
spike_RBD	-9.3
4uo6	-9.3
4uo5	-9.3
4g9f	-9.3
4cqw	-9.3
4bh3	-9.3
4bh3	-9.3
3se8	-9.3
3sdy	-9.3
3nf7	-9.3
3avb	-9.3
2x83	-9.3
2vvx	-9.3
2vvx	-9.3
2htw	-9.3
4qru	-9.2
4gag	-9.2
4bh4	-9.2
3nf9	-9.2
3nf8	-9.2
3nf8	-9.2
3nf6	-9.2
3nf6	-9.2
3alz	-9.2
2z35	-9.2
2xwy	-9.2
2wr2	-9.2
2wr0	-9.2
2wa1	-9.2
2htu	-9.2
1v2i	-9.2
1v2i	-9.2
1sk7	-9.2
1hhk	-9.2
4uo5	-9.1
4uo5	-9.1
4lst	-9.1
4iv3	-9.1
4gaj	-9.1
4g8g	-9.1
4e5i	-9.1
4bh4	-9.1
3zpb	-9.1
3se8	-9.1
3klv	-9.1
2bvq	-9.1
1quv	-9.1
5ajm	-9
4qru	-9
4qhl	-9
4gaj	-9
4cqq	-9
4bh4	-9
3v3m	-9
3nf9	-9
3mlh	-9
3avl	-9
3ava	-9
1sys	-9
1a41	-9
4qru	-8.9
4mj0	-8.9
4gv3	-8.9
4f3i	-8.9
3zp3	-8.9
3vbh	-8.9
3sv8	-8.9
3su1	-8.9
3s13	-8.9
3avf	-8.9
3avb	-8.9
2wr2	-8.9
2ghw	-8.9
2ge8	-8.9
1v3b	-8.9
main_protease	-8.8
4oph	-8.8
4jb9	-8.8
4ffz	-8.8
4bh1	-8.8
3ro5	-8.8
3nfa	-8.8
3d0g	-8.8
2wr1	-8.8
2uv0	-8.8
2uv0	-8.8
2uv0	-8.8
2uv0	-8.8
2uv0	-8.8
2uv0	-8.8
2uv0	-8.8
2uv0	-8.8
2uv0	-8.8
2uv0	-8.8
1b50	-8.8
4j4r	-8.7
4fqi	-8.7
4cqu	-8.7
4cqr	-8.7
3nwa	-8.7
3nwa	-8.7
3nfa	-8.7
3mj5	-8.7
3alw	-8.7
2zu5	-8.7
2wr1	-8.7
2wh6	-8.7
2uv0	-8.7
2uv0	-8.7
2axf	-8.7
4mmv	-8.6
4gv3	-8.6
4fqy	-8.6
4f3i	-8.6
4cqs	-8.6
4cqr	-8.6
3nf9	-8.6
3nf7	-8.6
2xi5	-8.6
2wr1	-8.6
2c7u	-8.6
2axf	-8.6
1n59	-8.6
4mj1	-8.5
4mj1	-8.5
4kpq	-8.5
4gag	-8.5
4fqi	-8.5
4cqs	-8.5
4co6	-8.5
3nf7	-8.5
3ku6	-8.5
3avk	-8.5
1v3b	-8.5
1rq9	-8.5
1p9s	-8.5
5ajm	-8.4
4uo0	-8.4
4qhk	-8.4
4pv8	-8.4
4oyd	-8.4
4mj0	-8.4
4fb3	-8.4
4cqu	-8.4
4cqq	-8.4
3ztn	-8.4
3sdy	-8.4
3rwi	-8.4
3ku6	-8.4
2yol	-8.4
2mgu	-8.4
1r6a	-8.4
4uo4	-8.3
4i32	-8.3
4i31	-8.3
4gye	-8.3
4gve	-8.3
4bgy	-8.3
4bgw	-8.3
4bgw	-8.3
3su6	-8.3
3su2	-8.3
3sdy	-8.3
3rwf	-8.3
3rwf	-8.3
3nw8	-8.3
3avc	-8.3
2yol	-8.3
2oy0	-8.3
1v3c	-8.3
1v3c	-8.3
4mg3	-8.2
4kps	-8.2
4fqy	-8.2
4fp8	-8.2
4cqu	-8.2
4cqu	-8.2
3zp1	-8.2
3uf5	-8.2
3suf	-8.2
3su2	-8.2
3su0	-8.2
3ku3	-8.2
3ku3	-8.2
2zu4	-8.2
2ztz	-8.2
2ge7	-8.2
4qrt	-8.1
4pv8	-8.1
4dko	-8.1
4bgx	-8.1
3zpb	-8.1
3v3m	-8.1
3sud	-8.1
3o4l	-8.1
3nf8	-8.1
3nf6	-8.1
3nf6	-8.1
3gsv	-8.1
2xze	-8.1
2x83	-8.1
2hcn	-8.1
5ajm	-8
5ajm	-8
5ajm	-8
5ajm	-8
4jpk	-8
4iv1	-8
4gzf	-8
4gzf	-8
4fp8	-8
4dkp	-8
4cqz	-8
4cqz	-8
4cqq	-8
4cqp	-8
4cqp	-8
4cqp	-8
4cqp	-8
3vbf	-8
3nwf	-8
3nfa	-8
3nfa	-8
3ku5	-8
2xze	-8
2oy0	-8
2ghv	-8
2c36	-8
1rv7	-8
4qrt	-7.9
4mmu	-7.9
4mmt	-7.9
4lsp	-7.9
4ep3	-7.9
4e76	-7.9
4dkq	-7.9
4dgc	-7.9
4cqp	-7.9
4cqp	-7.9
4bh1	-7.9
3zpa	-7.9
3uqi	-7.9
3su6	-7.9
3ku5	-7.9
3gsx	-7.9
3gsu	-7.9
2zol	-7.9
2q5u	-7.9
2q5u	-7.9
2c36	-7.9
1v3c	-7.9
4eq0	-7.8
4e92	-7.8
4dgd	-7.8
4dgc	-7.8
4dgc	-7.8
4dgc	-7.8
4dgb	-7.8
4cqu	-7.8
4bh1	-7.8
4bgz	-7.8
4bgx	-7.8
4b8e	-7.8
3uqi	-7.8
3sv7	-7.8
3sue	-7.8
3rwj	-7.8
3rwj	-7.8
3nf8	-7.8
2q5u	-7.8
4cqu	-7.7
3mj5	-7.7
3gsx	-7.7
3avb	-7.7
2q5u	-7.7
1v3e	-7.7
1v3e	-7.7
4u6h	-7.6
4eq0	-7.6
4ep3	-7.6
4egt	-7.6
4b8e	-7.6
4b8e	-7.6
3sud	-7.6
3p8o	-7.6
3kmq	-7.6
3d0i	-7.6
3avb	-7.6
2zu1	-7.6
2q7c	-7.6
1rpi	-7.6
1f08	-7.6
4i31	-7.5
4gye	-7.5
4dgc	-7.5
3vbf	-7.5
3sv9	-7.5
3su3	-7.5
3su0	-7.5
3kms	-7.5
3ifu	-7.5
3gsu	-7.5
2q7c	-7.5
2q7c	-7.5
2q5u	-7.5
4dgc	-7.4
3sv9	-7.4
3sit	-7.4
3gsr	-7.4
3avg	-7.4
1v3c	-7.4
1qr9	-7.4
1oop	-7.4
4ekx	-7.3
3sv6	-7.3
3sv6	-7.3
3su3	-7.3
3sit	-7.3
3sit	-7.3
2vvy	-7.3
2q7c	-7.3
2c86	-7.3
4lss	-7.2
4dgb	-7.2
3sis	-7.2
3m5h	-7.2
2q5u	-7.2
2ca1	-7.2
4ejd	-7.1
3su2	-7.1
3gzf	-7.1
3bwa	-7.1
2vxw	-7.1
2q7c	-7.1
2gvf	-7.1
4gv9	-7
4ejd	-7
4e92	-7
3w39	-7
3sit	-7
3pqy	-7
3avk	-7
3a07	-7
2zty	-7
2yhh	-7
2c3a	-7
papain_protease	-6.9
4c1w	-6.9
3su5	-6.9
3sis	-6.9
2yka	-6.9
2xpx	-6.9
1rpi	-6.9
4oyd	-6.8
4nwk	-6.8
4jpj	-6.8
4ipz	-6.8
4ejd	-6.8
4ejd	-6.8
4eee	-6.8
4dkr	-6.8
3sv7	-6.8
3rkc	-6.8
3b71	-6.8
3b71	-6.8
3vie	-6.7
3sit	-6.7
1z8r	-6.7
4nwl	-6.6
4ffy	-6.6
4dmn	-6.6
4dmn	-6.6
4b4n	-6.6
3su1	-6.6
3gsn	-6.6
3avn	-6.6
3avj	-6.6
2xya	-6.6
4i33	-6.5
4ejd	-6.5
4ejd	-6.5
4ejd	-6.5
4b4n	-6.5
3su5	-6.5
3s12	-6.5
3gsw	-6.5
2yhf	-6.5
2me4	-6.5
1rzk	-6.5
1qz8	-6.5
4g9d	-6.4
4g9d	-6.4
4epj	-6.4
4ejk	-6.4
4ejd	-6.4
4ejd	-6.4
3u83	-6.4
3u83	-6.4
3su5	-6.4
3p8n	-6.4
2y1s	-6.4
2wh6	-6.4
2mkr	-6.4
2m3l	-6.4
2lsp	-6.4
4g8i	-6.3
4dga	-6.3
4dga	-6.3
3avc	-6.3
2wfo	-6.3
2me2	-6.3
4ipz	-6.2
3su4	-6.2
3su4	-6.2
3sit	-6.2
2wfo	-6.2
2g69	-6.2
4ejk	-6.1
4ejk	-6.1
2zu3	-6.1
2v6q	-6.1
2q7c	-6.1
4ipz	-6
3sug	-6
2g69	-6
4mod	-5.9
3sug	-5.9
2m3m	-5.9
1zsd	-5.8
1yh3	-5.8
4nwk	-5.7
4ipz	-5.7
4c1w	-5.7
4lkk	-5.6
4ipz	-5.6
4g8i	-5.6
3zd0	-5.6
2xpx	-5.6
2l2f	-5.6
4mod	-5.4
4eqj	-5.4
1qr8	-5.4
4ejr	-5.3
3i6k	-5.2
3vtt	-5.1
3giv	-5.1
2x9m	-5
2vxj	-5
2l3h	-5
4ipz	-4.9
4ipz	-4.8
4ipz	-4.8
4adq	-4.8
4adq	-4.8
2hfz	-4.8
4ipz	-4.7
3vtt	-4.7
2me3	-4.7
3kqk	-4.6
4ipz	-4.5
4ipz	-4.4
4ep2	-4.3
4lki	-4.1
4lkh	-4.1
3j23	-4.1
3j22	-4.1
3vie	-3.9
4ep2	-3.7
4gu4	-3.2
4gu4	-3.2
4gu4	-3.1
4gu4	-3.1
4gu4	-3.1
4gu4	-3.1
4qhm	-2.9
3iyp	-2.8
2x5i	-2.8
4ipz	-2.5
4gu3	-2.3
4gu3	-2.3
4gu3	-2.3
4gu3	-2.3
4uoa	-2.2
4gu3	-2.2
4gu3	-2.2
4gu3	-2.2
4gu3	-2.2
4gu3	-2.2
4gu3	-2.2
4gu3	-2.2
4gu3	-2.2
3m5i	-1.7
4epj	-1.3
3m5g	-1.2
4kom	-1.1
4dge	-1
2jw8	-1
3m5j	-0.9
2zsv	-0.5
2zsv	-0.4
4g2k	-0.3
4e0r	-0.2
4g2k	-0.1

## Sheet: Entrectinib
PDB	Docking score
4j4x	-13
3s11	-12.2
2wrh	-12.2
4wm8	-12.1
4o4g	-12
4g42	-12
4j4y	-11.9
1izh	-11.9
4wm7	-11.8
4e78	-11.8
2i4x	-11.8
4e78	-11.7
3kqh	-11.7
3fku	-11.6
2wrg	-11.6
2wrg	-11.6
2wrg	-11.6
2wrg	-11.6
2wrg	-11.6
1klm	-11.6
4lsv	-11.5
4j4w	-11.5
4i2p	-11.5
4gua	-11.5
4cew	-11.5
4cdu	-11.5
3nxu	-11.5
2i4d	-11.5
2hjk	-11.5
4rw7	-11.4
4g43	-11.4
4f3z	-11.4
4cey	-11.4
3t3c	-11.4
3kqn	-11.4
3kqn	-11.4
3kqn	-11.4
3koa	-11.4
3b0w	-11.4
2wr3	-11.4
2bvp	-11.4
4uo7	-11.3
4uo7	-11.3
4uo7	-11.3
4uo7	-11.3
4i2p	-11.3
4cdx	-11.3
3t3c	-11.3
3kql	-11.3
3kql	-11.3
3bw9	-11.3
1r6a	-11.3
4uo7	-11.2
4uo7	-11.2
4qru	-11.2
4j4u	-11.2
4hkj	-11.2
4fnk	-11.2
3rwd	-11.2
2i4w	-11.2
4qru	-11.1
4qrs	-11.1
3rwg	-11.1
3rwg	-11.1
3kql	-11.1
2wrc	-11.1
2bvo	-11.1
1hhh	-11.1
4uo2	-11
4pv9	-11
4mka	-11
4k7f	-11
4k7f	-11
4g9f	-11
4a92	-11
4a92	-11
3ztj	-11
3i6l	-11
3gsw	-11
3bew	-11
2wrf	-11
2wre	-11
1v2i	-11
1v2i	-11
1p9u	-11
1hhk	-11
4uo2	-10.9
4uo2	-10.9
4uo2	-10.9
4uo0	-10.9
4uo0	-10.9
4uo0	-10.9
4uo0	-10.9
4rw4	-10.9
4rw4	-10.9
3u7s	-10.9
3rwe	-10.9
3rwe	-10.9
3r4b	-10.9
3ok9	-10.9
3lkh	-10.9
3lkh	-10.9
3h98	-10.9
3h98	-10.9
3gso	-10.9
3bw9	-10.9
3bev	-10.9
2wre	-10.9
2wre	-10.9
2wre	-10.9
2wre	-10.9
2wre	-10.9
1n5a	-10.9
1hhi	-10.9
4uo5	-10.8
4uo0	-10.8
4q6r	-10.8
4q6r	-10.8
4j4s	-10.8
4j4s	-10.8
3u7s	-10.8
3se9	-10.8
3bwa	-10.8
2ygb	-10.8
2ygb	-10.8
2wr2	-10.8
2i4v	-10.8
1izi	-10.8
4uo5	-10.7
4uo5	-10.7
4qrs	-10.7
4qhk	-10.7
4o44	-10.7
4mka	-10.7
4mg3	-10.7
4mg3	-10.7
4m8y	-10.7
4m8y	-10.7
4j4v	-10.7
4i2q	-10.7
4fvu	-10.7
4e7a	-10.7
3r4b	-10.7
3ggu	-10.7
3cpl	-10.7
2wr2	-10.7
2vvw	-10.7
2vvw	-10.7
2axg	-10.7
1ida	-10.7
4uo3	-10.6
4uo3	-10.6
4uo3	-10.6
4uo3	-10.6
4rw6	-10.6
4mkb	-10.6
4mk8	-10.6
4m30	-10.6
4e7a	-10.6
4e5l	-10.6
3vcl	-10.6
3vcl	-10.6
3vbr	-10.6
3rwc	-10.6
3n0i	-10.6
3h2l	-10.6
3gso	-10.6
3bwa	-10.6
2wr1	-10.6
2wr1	-10.6
2wr0	-10.6
2wr0	-10.6
2wr0	-10.6
2wr0	-10.6
2wr0	-10.6
2uv0	-10.6
2uv0	-10.6
2uv0	-10.6
2uv0	-10.6
1idb	-10.6
1hhj	-10.6
4uo0	-10.5
4uo0	-10.5
4uo0	-10.5
4uo0	-10.5
4uo0	-10.5
4mmr	-10.5
4mk9	-10.5
4m8x	-10.5
4m8x	-10.5
4fqi	-10.5
3rwi	-10.5
3rwh	-10.5
3rwh	-10.5
3n0i	-10.5
3klv	-10.5
3cpl	-10.5
3alx	-10.5
2wr4	-10.5
2wr1	-10.5
2uv0	-10.5
2uv0	-10.5
2uv0	-10.5
2uv0	-10.5
2uv0	-10.5
2uv0	-10.5
2uv0	-10.5
2uv0	-10.5
2i4u	-10.5
1syv	-10.5
4uo3	-10.4
4uo0	-10.4
4uo0	-10.4
4uo0	-10.4
4uo0	-10.4
4uo0	-10.4
4uo0	-10.4
4uo0	-10.4
4uo0	-10.4
4qhn	-10.4
4mk8	-10.4
4i7f	-10.4
4fqi	-10.4
4fnk	-10.4
4cdq	-10.4
3vbo	-10.4
3iyw	-10.4
3gsq	-10.4
3gsq	-10.4
3cj5	-10.4
3cj2	-10.4
2hu0	-10.4
2gec	-10.4
1v3d	-10.4
1v3d	-10.4
4uo2	-10.3
4uo2	-10.3
4unw	-10.3
4unw	-10.3
4unw	-10.3
4mkb	-10.3
4mk9	-10.3
4jkp	-10.3
4j6r	-10.3
4e5j	-10.3
4e5e	-10.3
4cdw	-10.3
3pqy	-10.3
3ku6	-10.3
3ku6	-10.3
3iyw	-10.3
3iyw	-10.3
3iyw	-10.3
3iyw	-10.3
3gsr	-10.3
3ggu	-10.3
2wr2	-10.3
2wa1	-10.3
2gec	-10.3
4pg2	-10.2
4opa	-10.2
4j4v	-10.2
4j4v	-10.2
4fqj	-10.2
4ej8	-10.2
4ej8	-10.2
4e5i	-10.2
4bac	-10.2
3rwc	-10.2
3iyw	-10.2
3gsw	-10.2
3d23	-10.2
3d23	-10.2
2hcs	-10.2
1pk0	-10.2
4uo3	-10.1
4rw9	-10.1
4pv9	-10.1
4mk7	-10.1
4j4v	-10.1
4j4v	-10.1
4cqv	-10.1
3u82	-10.1
3u82	-10.1
3rki	-10.1
3lqa	-10.1
3hkw	-10.1
2htw	-10.1
4uo3	-10
4uo3	-10
4uo3	-10
4uo3	-10
4unx	-10
4unx	-10
4unx	-10
4pv9	-10
4mgu	-10
4fqv	-10
4cqr	-10
4bh0	-10
3se8	-10
3ciz	-10
3alz	-10
2xi5	-10
2xi5	-10
1quv	-10
1a41	-10
4mk7	-9.9
4gaj	-9.9
4gaj	-9.9
4g8g	-9.9
4g8g	-9.9
4fqv	-9.9
4dag	-9.9
4cqr	-9.9
4bgz	-9.9
3tid	-9.9
3tid	-9.9
3se8	-9.9
3h2l	-9.9
3ebj	-9.9
3cj5	-9.9
3cj3	-9.9
3cj2	-9.9
3cj0	-9.9
3cj0	-9.9
2hty	-9.9
main_protease	-9.8
4uo6	-9.8
4rw8	-9.8
4qru	-9.8
4mms	-9.8
4mds	-9.8
4mds	-9.8
4lst	-9.8
4lsr	-9.8
4jo8	-9.8
4j4r	-9.8
4ejl	-9.8
3tie	-9.8
3tie	-9.8
3nf9	-9.8
3nf9	-9.8
3mj5	-9.8
3mj5	-9.8
3hkw	-9.8
3ciz	-9.8
2ygc	-9.8
2ygc	-9.8
2ht5	-9.8
1v3e	-9.8
1b53	-9.8
5ajm	-9.7
4uo6	-9.7
4lsu	-9.7
4lsu	-9.7
4jkp	-9.7
4g9f	-9.7
4ejl	-9.7
4e76	-9.7
4e5f	-9.7
3mlh	-9.7
3ku3	-9.7
3hkw	-9.7
3cj4	-9.7
3cj4	-9.7
2wr7	-9.7
1v3e	-9.7
1v3c	-9.7
5ajm	-9.6
4g9z	-9.6
4g9z	-9.6
4fqy	-9.6
4e5g	-9.6
4adf	-9.6
4adf	-9.6
4adf	-9.6
4adf	-9.6
4adf	-9.6
4adf	-9.6
3v3m	-9.6
3uf5	-9.6
3sdy	-9.6
3ku5	-9.6
3kna	-9.6
3hky	-9.6
3d0g	-9.6
3cj3	-9.6
1v3c	-9.6
1v3c	-9.6
1v3c	-9.6
1v3b	-9.6
4uo8	-9.5
4fqy	-9.5
4eq0	-9.5
4cqw	-9.5
3zp0	-9.5
3vbh	-9.5
3v3m	-9.5
3sdy	-9.5
3hky	-9.5
3avj	-9.5
2zu5	-9.5
2x83	-9.5
4u6h	-9.4
4qrt	-9.4
4mmu	-9.4
4mj1	-9.4
4mj0	-9.4
4jb9	-9.4
4gag	-9.4
4cqs	-9.4
3ku5	-9.4
3d0h	-9.4
2vvx	-9.4
2hu4	-9.4
4iv3	-9.3
4i2q	-9.3
4fp8	-9.3
4fp8	-9.3
4eq0	-9.3
4dkp	-9.3
4cqx	-9.3
4bgw	-9.3
3zp2	-9.3
3sdy	-9.3
3nf9	-9.3
3nf9	-9.3
3nf6	-9.3
2xra	-9.3
2x83	-9.3
2mgu	-9.3
2hu4	-9.3
2hu4	-9.3
2hu4	-9.3
1v3b	-9.3
1b50	-9.3
4unx	-9.2
4mze	-9.2
4gag	-9.2
4e91	-9.2
4cqy	-9.2
4cqs	-9.2
4bgy	-9.2
4bgw	-9.2
3ztn	-9.2
3s13	-9.2
3o4l	-9.2
3ku3	-9.2
3kmq	-9.2
2vvx	-9.2
2oy0	-9.2
2c7u	-9.2
4mmv	-9.1
4kpq	-9.1
4fqi	-9.1
4f3i	-9.1
4f3i	-9.1
4cqp	-9.1
4cqp	-9.1
4cqp	-9.1
3oah	-9.1
3nwf	-9.1
3nwa	-9.1
3nwa	-9.1
3nfa	-9.1
3nf6	-9.1
3kms	-9.1
3gsn	-9.1
3avf	-9.1
3ava	-9.1
3ava	-9.1
2htu	-9.1
4qhl	-9
4oph	-9
4fqr	-9
4fqr	-9
4cqq	-9
4cqq	-9
4cqq	-9
4cqp	-9
4cqp	-9
4cqp	-9
4bgx	-9
3nfa	-9
3nf6	-9
3avg	-9
2iph	-9
2iph	-9
1oop	-9
1n59	-9
4pv8	-8.9
4lkj	-8.9
4egt	-8.9
4dko	-8.9
4cqu	-8.9
4bh1	-8.9
4bh1	-8.9
4bh1	-8.9
3rwj	-8.9
3rwj	-8.9
3nf8	-8.9
3nf8	-8.9
3nf8	-8.9
3nf6	-8.9
3avh	-8.9
3avb	-8.9
2iph	-8.9
2iph	-8.9
2c36	-8.9
1sk7	-8.9
4jpk	-8.8
4cqz	-8.8
3uqi	-8.8
3nf8	-8.8
3gsv	-8.8
3gsr	-8.8
3d0i	-8.8
3avc	-8.8
3avb	-8.8
3ava	-8.8
3ava	-8.8
2c36	-8.8
1rzj	-8.8
1r6a	-8.8
4uny	-8.7
4mza	-8.7
4mza	-8.7
4mj1	-8.7
4ffz	-8.7
4cqz	-8.7
4bh3	-8.7
4bh2	-8.7
4bgx	-8.7
3uqi	-8.7
3sv8	-8.7
3nfa	-8.7
3nfa	-8.7
3nf7	-8.7
3nf7	-8.7
3nf7	-8.7
3i6g	-8.7
3gsx	-8.7
3gsx	-8.7
2xwy	-8.7
1p9s	-8.7
4mze	-8.6
4gv3	-8.6
4gv3	-8.6
4cr0	-8.6
4cqu	-8.6
4cqu	-8.6
4cqu	-8.6
4co6	-8.6
4bh3	-8.6
4bh3	-8.6
4bh3	-8.6
3zpb	-8.6
3zp3	-8.6
3zp1	-8.6
3nf7	-8.6
3gsv	-8.6
3avl	-8.6
2zu4	-8.6
2yka	-8.6
5ajm	-8.5
5ajm	-8.5
5ajm	-8.5
5ajm	-8.5
4qrt	-8.5
4lsp	-8.5
4kps	-8.5
4gye	-8.5
4gye	-8.5
4fb3	-8.5
4ejd	-8.5
4ejd	-8.5
4ejd	-8.5
4eee	-8.5
4dga	-8.5
4cqu	-8.5
4cqu	-8.5
3zpb	-8.5
3zp6	-8.5
3nw8	-8.5
3gzf	-8.5
3avn	-8.5
3avl	-8.5
3avb	-8.5
2q7c	-8.5
2oy0	-8.5
2ge7	-8.5
4pv8	-8.4
4i32	-8.4
4i31	-8.4
4i31	-8.4
4dgd	-8.4
3zpa	-8.4
3rwi	-8.4
3rwf	-8.4
3rwf	-8.4
3oah	-8.4
2hcn	-8.4
2ghw	-8.4
4gzf	-8.3
4gzf	-8.3
4dgb	-8.3
4dga	-8.3
4bh4	-8.3
4bh4	-8.3
4bh4	-8.3
3gsu	-8.3
3avk	-8.3
3avb	-8.3
4g9d	-8.2
4e92	-8.2
4dgd	-8.2
4dgc	-8.2
4dgc	-8.2
4dgc	-8.2
4dgc	-8.2
4dgb	-8.2
4bh4	-8.2
4b8e	-8.2
4b8e	-8.2
4b8e	-8.2
3su2	-8.2
3gsu	-8.2
2q7c	-8.2
2q7c	-8.2
1qz8	-8.2
4mmt	-8.1
4dgc	-8.1
3p8n	-8.1
3gsw	-8.1
3avg	-8.1
2z35	-8.1
2wfo	-8.1
2bvq	-8.1
1rq9	-8.1
4nwk	-8
4gv9	-8
4ep3	-8
3p8o	-8
1sys	-8
spike_RBD	-7.9
4i33	-7.9
4dgc	-7.9
4bh2	-7.9
3sud	-7.9
3su1	-7.9
3su0	-7.9
3ro5	-7.9
2xpx	-7.9
2wfo	-7.9
2vvy	-7.9
2ge8	-7.9
papain_protease	-7.8
4oyd	-7.8
4gve	-7.8
4ep3	-7.8
4ejd	-7.8
3suf	-7.8
3sud	-7.8
3su5	-7.8
3su5	-7.8
3su5	-7.8
3su1	-7.8
3avk	-7.8
2hfz	-7.8
4qrt	-7.7
4mj0	-7.7
4lss	-7.7
4iv1	-7.7
4ejd	-7.7
4dkq	-7.7
3su6	-7.7
3su6	-7.7
3su3	-7.7
2zty	-7.7
2gvf	-7.7
1rzk	-7.7
1rv7	-7.7
1f08	-7.7
4nwl	-7.6
4g9d	-7.6
4g8i	-7.6
4e92	-7.6
3vbf	-7.6
3vbf	-7.6
3sv9	-7.6
3sv9	-7.6
3sv6	-7.6
3sv6	-7.6
3sue	-7.6
3su3	-7.6
3avh	-7.6
2zu1	-7.6
2yhh	-7.6
2lsp	-7.6
2axf	-7.6
2axf	-7.6
1rpi	-7.6
3sis	-7.5
3sis	-7.5
3avn	-7.5
3avc	-7.5
2xpx	-7.5
2wh6	-7.5
2ca1	-7.5
3w39	-7.4
3sv7	-7.4
3rkc	-7.4
2yol	-7.4
2y1s	-7.4
2xze	-7.4
2wh6	-7.4
2ghv	-7.4
4g8i	-7.3
4ekx	-7.3
3su0	-7.3
3bwa	-7.3
2yol	-7.3
2xze	-7.3
2xya	-7.3
1rpi	-7.3
4jpj	-7.2
4ejk	-7.2
4dkr	-7.2
3sv7	-7.2
3su2	-7.2
3su2	-7.2
2g69	-7.2
3sug	-7.1
3m5h	-7.1
3ifu	-7.1
3a07	-7.1
2vxw	-7.1
1z8r	-7.1
1yh3	-7.1
4oyd	-7
4ejk	-7
4ejd	-7
4ejd	-7
4dmn	-7
4dmn	-7
4b4n	-7
4b4n	-7
3sug	-7
3sit	-7
3sit	-7
3avj	-7
2zol	-7
1qr9	-7
4ejd	-6.9
4ejd	-6.9
3u83	-6.9
3sit	-6.9
3sit	-6.9
3sit	-6.9
3b71	-6.9
3b71	-6.9
2q7c	-6.9
2q7c	-6.9
2q7c	-6.9
4ejk	-6.8
3vie	-6.8
3u83	-6.8
3su4	-6.8
3su4	-6.8
3sit	-6.8
2ztz	-6.8
3alw	-6.7
2v6q	-6.7
4ffy	-6.6
2yhf	-6.6
2c86	-6.6
4nwk	-6.5
2m3l	-6.5
2me2	-6.4
2g69	-6.4
2c3a	-6.4
4c1w	-6.3
3s12	-6.3
2zu3	-6.3
2q5u	-6.3
2q5u	-6.3
2q5u	-6.3
2q5u	-6.3
2q5u	-6.3
2q5u	-6.3
1qr8	-6.3
4epj	-6.2
4c1w	-6.2
3kqk	-6.1
3i6k	-6.1
1zsd	-6.1
4ipz	-6
4eqj	-6
3zd0	-6
4ejr	-5.9
4mod	-5.8
4ipz	-5.8
4ipz	-5.8
4ipz	-5.8
4ipz	-5.8
2me3	-5.8
2l2f	-5.8
4ipz	-5.7
4ipz	-5.7
4ipz	-5.7
4ipz	-5.7
4mod	-5.6
4ipz	-5.6
4ipz	-5.6
2x9m	-5.6
2vxj	-5.6
2me4	-5.6
4uo4	-5.5
4ipz	-5.5
4adq	-5.5
4adq	-5.5
3giv	-5.5
2m3m	-5.5
3vie	-5.3
2mkr	-5.3
3j22	-5
3vtt	-4.9
3j23	-4.9
2l3h	-4.7
4epj	-4.6
3vtt	-4.6
4ep2	-4.1
3m5g	-4.1
1hhg	-4.1
4ep2	-3.9
4g2k	-3.8
4g2k	-3.5
4qhm	-3.1
4lki	-3.1
4lkh	-3.1
4lkk	-1.9
4dge	-1.3
2zsv	-1
2zsv	-1
4e0r	-0.5
4g1g	-0.3
4fqm	-0.2
2x5i	-0.1

## Sheet: Bromocriptine
PDB	Docking score
3u7s	-12.8
3u7s	-12.7
3nxu	-11.8
3kqn	-11.6
4j4x	-11.5
3kqn	-11.5
3kqn	-11.5
1ida	-11.3
4j4s	-11.2
4j4s	-11.2
4a92	-11.1
3lkh	-11.1
2i4v	-11.1
4uo3	-11
4g42	-11
4uo7	-10.9
4uo7	-10.9
4uo7	-10.9
4uo7	-10.9
4uo7	-10.9
4a92	-10.9
3hkw	-10.9
3hkw	-10.9
3hkw	-10.9
4uo7	-10.8
3cj0	-10.8
1quv	-10.8
4o44	-10.7
3cj0	-10.7
2wr0	-10.7
2i4x	-10.7
4q6r	-10.6
4q6r	-10.6
4mka	-10.6
4e7a	-10.6
4e7a	-10.6
3kqh	-10.6
3cj3	-10.6
3cj3	-10.6
3ciz	-10.6
3ciz	-10.6
2wr0	-10.6
2i4d	-10.6
4mka	-10.5
4bh0	-10.5
3t3c	-10.5
3koa	-10.5
3cj5	-10.5
2wr0	-10.5
4uo3	-10.4
4qrs	-10.4
4qrs	-10.4
4mk9	-10.4
3hky	-10.4
3hky	-10.4
3ggu	-10.4
3cj5	-10.4
3cj2	-10.4
2i4w	-10.4
2i4u	-10.4
1p9u	-10.4
4uo3	-10.3
4uo3	-10.3
4uo3	-10.3
4rw4	-10.3
4rw4	-10.3
4qru	-10.3
4pg2	-10.3
4mkb	-10.3
4j4v	-10.3
4j4v	-10.3
3cj2	-10.3
2wr1	-10.3
2wr0	-10.3
1syv	-10.3
1r6a	-10.3
4uo5	-10.2
4uo5	-10.2
4mk8	-10.2
4mk8	-10.2
4j4y	-10.2
4j4v	-10.2
4j4v	-10.2
3ztj	-10.2
3h98	-10.2
3h98	-10.2
2wrg	-10.2
2wr1	-10.2
2wr1	-10.2
2axg	-10.2
4wm8	-10.1
4uo5	-10.1
4rw8	-10.1
4qru	-10.1
4mk7	-10.1
4mk7	-10.1
4j4w	-10.1
4j4u	-10.1
4fnk	-10.1
4ej8	-10.1
4ej8	-10.1
3t3c	-10.1
3cj4	-10.1
2wrg	-10.1
2wrg	-10.1
2wrg	-10.1
2wrg	-10.1
4rw9	-10
4mkb	-10
4e5e	-10
4bac	-10
3vbo	-10
3tid	-10
3ok9	-10
3h2l	-10
3h2l	-10
3d23	-10
3d23	-10
3cpl	-10
3cj4	-10
3bew	-10
2ygb	-10
2ygb	-10
2wr4	-10
4qhk	-9.9
4j4v	-9.9
4gua	-9.9
4e78	-9.9
4e78	-9.9
3tie	-9.9
3tie	-9.9
2wre	-9.9
2wre	-9.9
1n5a	-9.9
4uo0	-9.8
4uo0	-9.8
4uo0	-9.8
4uo0	-9.8
4uo0	-9.8
4uo0	-9.8
4uo0	-9.8
4uo0	-9.8
4uo0	-9.8
4uo0	-9.8
4uo0	-9.8
4uo0	-9.8
4uo0	-9.8
4uo0	-9.8
4uo0	-9.8
4uo0	-9.8
4uo0	-9.8
4uo0	-9.8
4unw	-9.8
4unw	-9.8
4pv9	-9.8
4jo8	-9.8
3mlh	-9.8
3cpl	-9.8
2ygc	-9.8
2ygc	-9.8
2wre	-9.8
2gec	-9.8
2gec	-9.8
2bvo	-9.8
1idb	-9.8
1hhk	-9.8
main_protease	-9.7
4mk9	-9.7
4mds	-9.7
4mds	-9.7
4fqy	-9.7
4cqq	-9.7
4cqq	-9.7
4cqq	-9.7
3vbr	-9.7
3se8	-9.7
3se8	-9.7
3rwd	-9.7
3fku	-9.7
3bwa	-9.7
2wrh	-9.7
2wre	-9.7
2wre	-9.7
2wre	-9.7
2wa1	-9.7
4unw	-9.6
4rw7	-9.6
4pv9	-9.6
4pv9	-9.6
4o4g	-9.6
4i2q	-9.6
4fqy	-9.6
4fp8	-9.6
4cqw	-9.6
3s11	-9.6
3rwe	-9.6
3kql	-9.6
3kql	-9.6
3kql	-9.6
3ebj	-9.6
5ajm	-9.5
5ajm	-9.5
5ajm	-9.5
5ajm	-9.5
5ajm	-9.5
5ajm	-9.5
4opa	-9.5
4j4r	-9.5
4fqr	-9.5
4fqj	-9.5
3tid	-9.5
3rwe	-9.5
3nf6	-9.5
3n0i	-9.5
3lkh	-9.5
3ku3	-9.5
3kna	-9.5
2wr2	-9.5
2wr0	-9.5
2hjk	-9.5
4uo3	-9.4
4uo3	-9.4
4uo3	-9.4
4gaj	-9.4
4gaj	-9.4
4gag	-9.4
4gag	-9.4
4g9f	-9.4
4fqr	-9.4
4e5f	-9.4
4cr0	-9.4
4cqu	-9.4
4cqu	-9.4
4cqu	-9.4
4cqu	-9.4
4cqu	-9.4
4cqu	-9.4
4cqr	-9.4
4cqr	-9.4
4adf	-9.4
4adf	-9.4
4adf	-9.4
4adf	-9.4
4adf	-9.4
4adf	-9.4
3rki	-9.4
3gsq	-9.4
3bw9	-9.4
2wr2	-9.4
2wr2	-9.4
2hcs	-9.4
1hhi	-9.4
4uo2	-9.3
4uo2	-9.3
4uo2	-9.3
4uo2	-9.3
4uo2	-9.3
4uo2	-9.3
4uny	-9.3
4mj1	-9.3
4m8y	-9.3
4k7f	-9.3
4fnk	-9.3
4cqv	-9.3
4bgx	-9.3
4bgx	-9.3
3vbh	-9.3
3s13	-9.3
3r4b	-9.3
3nf8	-9.3
3nf7	-9.3
3n0i	-9.3
3gsw	-9.3
3bev	-9.3
2xwy	-9.3
2vvx	-9.3
1a41	-9.3
4unx	-9.2
4unx	-9.2
4unx	-9.2
4rw6	-9.2
4qhn	-9.2
3zp3	-9.2
3zp1	-9.2
3sdy	-9.2
3sdy	-9.2
3sdy	-9.2
3rwh	-9.2
3rwh	-9.2
3rwc	-9.2
3rwc	-9.2
3r4b	-9.2
3nf7	-9.2
3iyw	-9.2
3iyw	-9.2
3iyw	-9.2
3iyw	-9.2
3iyw	-9.2
3iyw	-9.2
3i6l	-9.2
3gsw	-9.2
3gso	-9.2
3bwa	-9.2
3avl	-9.2
3ava	-9.2
3ava	-9.2
1v3d	-9.2
1v3d	-9.2
1klm	-9.2
4unx	-9.1
4lst	-9.1
4k7f	-9.1
4cqp	-9.1
4cqp	-9.1
4cqp	-9.1
4cqp	-9.1
4cqp	-9.1
4cew	-9.1
3v3m	-9.1
3nf8	-9.1
3gsr	-9.1
3d0g	-9.1
3bw9	-9.1
2wr7	-9.1
2hu4	-9.1
2hu4	-9.1
2hu4	-9.1
2hu4	-9.1
2bvp	-9.1
4uo3	-9
4mj0	-9
4m30	-9
4m8y	-9
4kpq	-9
4jb9	-9
4g43	-9
4e5g	-9
4dag	-9
4cqp	-9
4bh1	-9
4bh1	-9
4bh1	-9
3v3m	-9
3se9	-9
3gso	-9
2vvw	-9
1hhj	-9
1hhh	-9
4uo3	-8.9
4m8x	-8.9
4kps	-8.9
4hkj	-8.9
4ffz	-8.9
4ejl	-8.9
3zp6	-8.9
3vcl	-8.9
3rwi	-8.9
3nf7	-8.9
3nf7	-8.9
3ku5	-8.9
3gsq	-8.9
3ggu	-8.9
3b0w	-8.9
3avj	-8.9
2vvw	-8.9
1izi	-8.9
4i2p	-8.8
4fp8	-8.8
4cqs	-8.8
4cqs	-8.8
4co6	-8.8
3zpb	-8.8
3vcl	-8.8
3ku5	-8.8
2hu0	-8.8
1v3e	-8.8
4lsr	-8.7
4bgw	-8.7
3zpb	-8.7
3zp0	-8.7
3u82	-8.7
3u82	-8.7
3rwg	-8.7
3rwg	-8.7
2xra	-8.7
2vvx	-8.7
2oy0	-8.7
1v3e	-8.7
1v3b	-8.7
4uo6	-8.6
4mza	-8.6
4m8x	-8.6
4ejl	-8.6
4e76	-8.6
4cqz	-8.6
4bgw	-8.6
3zpa	-8.6
3zp2	-8.6
3nfa	-8.6
3ku6	-8.6
3ku6	-8.6
3ku3	-8.6
3klv	-8.6
3d0h	-8.6
3alz	-8.6
2hty	-8.6
1v3b	-8.6
1rzj	-8.6
1oop	-8.6
1b53	-8.6
4lsv	-8.5
4i2q	-8.5
4cqz	-8.5
4bgz	-8.5
3nwa	-8.5
3nwa	-8.5
3nfa	-8.5
3nfa	-8.5
3nfa	-8.5
3nf8	-8.5
3avh	-8.5
2uv0	-8.5
2uv0	-8.5
2uv0	-8.5
2uv0	-8.5
2htw	-8.5
4wm7	-8.4
4mj1	-8.4
4fqi	-8.4
4bgy	-8.4
3nf9	-8.4
3nf6	-8.4
3avf	-8.4
2z35	-8.4
2uv0	-8.4
2uv0	-8.4
2uv0	-8.4
2uv0	-8.4
2uv0	-8.4
2uv0	-8.4
2uv0	-8.4
2uv0	-8.4
2oy0	-8.4
2mgu	-8.4
1v2i	-8.4
1v2i	-8.4
1sk7	-8.4
1rv7	-8.4
1izh	-8.4
4mmu	-8.3
4mgu	-8.3
4g8g	-8.3
4g8g	-8.3
4eq0	-8.3
3nf8	-8.3
2wrf	-8.3
2ge7	-8.3
1r6a	-8.3
1pk0	-8.3
4mj0	-8.2
4mg3	-8.2
4mg3	-8.2
4lsu	-8.2
4lsu	-8.2
4j6r	-8.2
4i7f	-8.2
4fb3	-8.2
4e5j	-8.2
3lqa	-8.2
2zu5	-8.2
2zu4	-8.2
2iph	-8.2
2iph	-8.2
2iph	-8.2
1v3c	-8.2
1v3c	-8.2
1v3c	-8.2
4uo6	-8.1
4qhl	-8.1
4mza	-8.1
4iv3	-8.1
3nwf	-8.1
3nf9	-8.1
3avg	-8.1
2x83	-8.1
2iph	-8.1
2ht5	-8.1
1v3c	-8.1
4mmr	-8
4eq0	-8
4cqx	-8
4bh4	-8
4bh4	-8
4bh4	-8
4bh2	-8
4bh2	-8
3ro5	-8
3o4l	-8
3avn	-8
2wr3	-8
2gvf	-8
1rzk	-8
1b50	-8
4mms	-7.9
4i2p	-7.9
4gve	-7.9
4egt	-7.9
2xi5	-7.9
2xi5	-7.9
2x83	-7.9
2wrc	-7.9
2ghw	-7.9
2c7u	-7.9
1p9s	-7.9
4pv8	-7.8
4g9f	-7.8
3nf9	-7.8
3nf9	-7.8
3gsv	-7.8
spike_RBD	-7.7
4qrt	-7.7
4pv8	-7.7
4dkq	-7.7
4dgd	-7.7
4cey	-7.7
3ztn	-7.7
3uf5	-7.7
3oah	-7.7
3gsu	-7.7
3alx	-7.7
2wh6	-7.7
2vvy	-7.7
2hcn	-7.7
1n59	-7.7
4lsp	-7.6
4fvu	-7.6
4f3i	-7.6
4f3i	-7.6
4e5l	-7.6
4dkp	-7.6
4cdq	-7.6
3vbf	-7.6
3su1	-7.6
3nw8	-7.6
3avb	-7.6
3avb	-7.6
2ge8	-7.6
4qru	-7.5
4f3z	-7.5
4cqy	-7.5
3vbf	-7.5
3rwi	-7.5
3oah	-7.5
3nf6	-7.5
3nf6	-7.5
3mj5	-7.5
3mj5	-7.5
3i6g	-7.5
3gsw	-7.5
3avc	-7.5
4i31	-7.4
4i31	-7.4
4cdx	-7.4
4cdw	-7.4
3avl	-7.4
3ava	-7.4
3ava	-7.4
2htu	-7.4
2c36	-7.4
2c36	-7.4
4qrt	-7.3
4oyd	-7.3
4i32	-7.3
4dko	-7.3
3avk	-7.3
3avb	-7.3
3avb	-7.3
3a07	-7.3
2zty	-7.3
2yka	-7.3
2q7c	-7.3
2ghv	-7.3
4fqi	-7.2
4fqi	-7.2
4cdu	-7.2
3w39	-7.2
3sud	-7.2
3gsr	-7.2
3avh	-7.2
3avg	-7.2
2q7c	-7.2
4dgc	-7.1
4dgc	-7.1
4dgc	-7.1
4dgc	-7.1
4dgc	-7.1
4bh4	-7.1
3su2	-7.1
3su2	-7.1
3rwj	-7.1
3rwj	-7.1
3rwf	-7.1
3rwf	-7.1
3gsv	-7.1
3gsu	-7.1
2xya	-7.1
2xpx	-7.1
papain_protease	-7
4ejd	-7
4dgd	-7
4b8e	-7
3pqy	-7
2lsp	-7
2ca1	-7
1rq9	-7
1qz8	-7
4iv1	-6.9
4ejd	-6.9
4ejd	-6.9
4e5i	-6.9
4dgc	-6.9
4b8e	-6.9
3su0	-6.9
3sis	-6.9
3gsx	-6.9
3gsx	-6.9
1yh3	-6.9
4lss	-6.8
4gv3	-6.8
4gv3	-6.8
4dkr	-6.8
4b8e	-6.8
2wh6	-6.8
2q7c	-6.8
2g69	-6.8
1rpi	-6.8
4qrt	-6.7
4jpj	-6.7
4jkp	-6.7
4g9z	-6.7
4ffy	-6.7
4e92	-6.7
4e92	-6.7
3su6	-6.7
3sis	-6.7
3m5h	-6.7
2zu1	-6.7
2v6q	-6.7
1rpi	-6.7
4oyd	-6.6
4gzf	-6.6
4gzf	-6.6
4dgb	-6.6
4dgb	-6.6
3uqi	-6.6
3sv8	-6.6
3sit	-6.6
3sit	-6.6
3sit	-6.6
3sit	-6.6
3sit	-6.6
2zol	-6.6
2yol	-6.6
1qr8	-6.6
4i33	-6.5
4e91	-6.5
4bh3	-6.5
4bh3	-6.5
4bh3	-6.5
4bh3	-6.5
3vie	-6.5
3su3	-6.5
3su3	-6.5
3sit	-6.5
2ztz	-6.5
2g69	-6.5
2bvq	-6.5
1f08	-6.5
4oph	-6.4
4lkj	-6.4
4gv9	-6.4
4g9z	-6.4
4fqv	-6.4
4ejk	-6.4
4dmn	-6.4
4dmn	-6.4
3ifu	-6.4
3gsn	-6.4
3bwa	-6.4
3avc	-6.4
2yhf	-6.4
2xpx	-6.4
2me2	-6.4
4nwl	-6.3
4gye	-6.3
4fqv	-6.3
4ejd	-6.3
3u83	-6.3
3u83	-6.3
3sv6	-6.3
3sv6	-6.3
3su5	-6.3
2xze	-6.3
2vxw	-6.3
1sys	-6.3
4jpk	-6.2
4epj	-6.2
4ep3	-6.2
4ep3	-6.2
4eee	-6.2
4b4n	-6.2
3sv9	-6.2
3sud	-6.2
3su6	-6.2
3su5	-6.2
3su5	-6.2
3su4	-6.2
3su4	-6.2
3su2	-6.2
3su1	-6.2
3kmq	-6.2
3b71	-6.2
2yhh	-6.2
2y1s	-6.2
2q5u	-6.2
2q5u	-6.2
2q5u	-6.2
2q5u	-6.2
2q5u	-6.2
2q5u	-6.2
4u6h	-6.1
4nwk	-6.1
4jkp	-6.1
4ejr	-6.1
4ejd	-6.1
4ejd	-6.1
4ejd	-6.1
4b4n	-6.1
3sug	-6.1
3suf	-6.1
3su0	-6.1
3s12	-6.1
3p8o	-6.1
3p8n	-6.1
3kms	-6.1
2wfo	-6.1
2axf	-6.1
4nwk	-6
4g9d	-6
3sv7	-6
3d0i	-6
3b71	-6
2wfo	-6
4ejd	-5.9
3sv9	-5.9
3sv7	-5.9
3rkc	-5.9
3avj	-5.9
2c86	-5.9
2axf	-5.9
4mod	-5.8
4mod	-5.8
4mmv	-5.8
4gye	-5.8
4ekx	-5.8
4ejd	-5.8
3sug	-5.8
3gzf	-5.8
2yol	-5.8
4mmt	-5.7
4c1w	-5.7
3uqi	-5.7
3i6k	-5.7
3avk	-5.7
3alw	-5.7
2m3l	-5.7
4mze	-5.6
2xze	-5.6
2q7c	-5.6
2q7c	-5.6
2q7c	-5.6
2c3a	-5.6
4mze	-5.5
3sue	-5.5
2x9m	-5.5
4adq	-5.4
4adq	-5.4
2me4	-5.4
2l2f	-5.4
4ipz	-5.3
4c1w	-5.2
3avn	-5.2
2mkr	-5.2
1qr9	-5.2
4g8i	-5.1
3vtt	-5.1
1zsd	-5.1
3kqk	-5
3giv	-5
4ejk	-4.9
3vie	-4.9
2zu3	-4.9
2vxj	-4.9
4ipz	-4.8
4ipz	-4.8
4ipz	-4.7
4ipz	-4.7
4ipz	-4.7
4dga	-4.7
3vtt	-4.7
2hfz	-4.7
4dga	-4.6
3zd0	-4.6
4g8i	-4.5
4ep2	-4.5
1z8r	-4.5
4g9d	-4.4
4ep2	-4.4
3j23	-4.4
3j22	-4.4
4uo8	-4.1
4epj	-3.9
2l3h	-3.8
4ejk	-3.6
2m3m	-3.6
4ipz	-3.5
4ipz	-3.4
2me3	-3.4
4qhm	-3.3
4ipz	-2.9
4ipz	-2.9
4ipz	-2.8
4ipz	-1.9
4dge	-1.6
4eqj	-1.5
2zsv	-1.1
2zsv	-1
4e0r	-0.7
4gu4	-0.6
4gu4	-0.6
4gu4	-0.6
4gu4	-0.6
4gu4	-0.6
4gu4	-0.5
3m5i	-0.4
4gu3	-0.1
4gu3	-0.1
4gu3	-0.1
4gu3	-0.1
4gu3	-0.1
4gu3	-0.1
4gu3	-0.1
4gu3	-0.1
4gu3	-0.1
4gu3	-0.1
4gu3	-0.1
4gu3	-0.1
4fqm	-0.1

## Sheet: Peficitinib
PDB	Docking score
3u7s	-12.7
3u7s	-12.6
3nxu	-11.5
3kqn	-11.3
3kqn	-11.3
3kqn	-11.3
4uo7	-11.2
4uo7	-11.2
4j4x	-11.2
4uo7	-11.1
4uo7	-11.1
4uo7	-11.1
4uo7	-11.1
4o44	-11.1
4a92	-11.1
3lkh	-11.1
4j4s	-11
4j4s	-11
4a92	-11
4uo3	-10.9
4uo3	-10.9
4uo3	-10.9
3hkw	-10.9
3hkw	-10.8
3hkw	-10.8
3cj0	-10.8
2i4v	-10.8
4uo3	-10.7
4uo3	-10.7
3koa	-10.7
3cj0	-10.7
2i4x	-10.7
4uo5	-10.6
4g42	-10.6
4e7a	-10.6
4e7a	-10.6
4bh0	-10.6
3t3c	-10.6
3cj5	-10.6
1quv	-10.6
4uo5	-10.5
4qrs	-10.5
3cj3	-10.5
3cj3	-10.5
3ciz	-10.5
2wr0	-10.5
2wr0	-10.5
4rw4	-10.4
4rw4	-10.4
4mk9	-10.4
3t3c	-10.4
3kqh	-10.4
4qru	-10.3
4qru	-10.3
4qrs	-10.3
3hky	-10.3
3hky	-10.3
2i4d	-10.3
4wm8	-10.2
4uo5	-10.2
4pg2	-10.2
4j4w	-10.2
3tie	-10.2
3tie	-10.2
2i4w	-10.2
2i4u	-10.2
2axg	-10.2
1syv	-10.2
4rw8	-10.1
4mka	-10.1
4mk8	-10.1
4j4y	-10.1
4j4u	-10.1
3h98	-10.1
3h98	-10.1
3bew	-10.1
2wr0	-10.1
1p9u	-10.1
1n5a	-10.1
1idb	-10.1
1ida	-10.1
4rw9	-10
4bac	-10
3vbo	-10
3d23	-10
3d23	-10
3cj4	-10
3cj2	-10
3ciz	-10
2ygc	-10
2ygc	-10
2wrg	-10
2wrg	-10
2wrg	-10
2wrg	-10
2wr1	-10
2wr0	-10
2bvo	-10
4mkb	-9.9
4mkb	-9.9
4mka	-9.9
4mk8	-9.9
4mk7	-9.9
4j4v	-9.9
4j4v	-9.9
4j4v	-9.9
4j4v	-9.9
4j4v	-9.9
4gua	-9.9
3mlh	-9.9
3cj4	-9.9
3cj2	-9.9
3bev	-9.9
2wrg	-9.9
2gec	-9.9
2gec	-9.9
main_protease	-9.8
4uo0	-9.8
4uo0	-9.8
4uo0	-9.8
4uo0	-9.8
4uo0	-9.8
4uo0	-9.8
4uo0	-9.8
4uo0	-9.8
4uo0	-9.8
4uo0	-9.8
4unw	-9.8
4unw	-9.8
4qhk	-9.8
4mk7	-9.8
3tid	-9.8
3rwe	-9.8
3lkh	-9.8
4uo0	-9.7
4uo0	-9.7
4uo0	-9.7
4uo0	-9.7
4uo0	-9.7
4uo0	-9.7
4uo0	-9.7
4unw	-9.7
4rw6	-9.7
4g9f	-9.7
4fqy	-9.7
3vbr	-9.7
3tid	-9.7
3s11	-9.7
3rwe	-9.7
3h2l	-9.7
3h2l	-9.7
3cpl	-9.7
3bwa	-9.7
3bw9	-9.7
2wrh	-9.7
2wr4	-9.7
2wr1	-9.7
2wr1	-9.7
2hjk	-9.7
1r6a	-9.7
4uo0	-9.6
4rw7	-9.6
4mk9	-9.6
4jo8	-9.6
4j4r	-9.6
4i2q	-9.6
4fqy	-9.6
4e78	-9.6
4cqw	-9.6
3nf6	-9.6
3n0i	-9.6
3cj5	-9.6
2wa1	-9.6
4pv9	-9.5
4pv9	-9.5
4o4g	-9.5
4mmu	-9.5
4k7f	-9.5
4cqq	-9.5
4cqq	-9.5
4cqq	-9.5
3rwd	-9.5
3rki	-9.5
3nf6	-9.5
3n0i	-9.5
3kql	-9.5
3kql	-9.5
3kql	-9.5
3kna	-9.5
3fku	-9.5
3cpl	-9.5
3bwa	-9.5
2ygb	-9.5
2ygb	-9.5
2xwy	-9.5
2wre	-9.5
2wre	-9.5
2wre	-9.5
2wre	-9.5
2wre	-9.5
2wre	-9.5
1klm	-9.5
1hhi	-9.5
4uny	-9.4
4q6r	-9.4
4q6r	-9.4
4opa	-9.4
4gag	-9.4
4gag	-9.4
4g43	-9.4
4fqj	-9.4
3ztj	-9.4
3rwc	-9.4
3rwc	-9.4
3ku3	-9.4
3ebj	-9.4
2wr2	-9.4
2wr2	-9.4
2wr2	-9.4
1a41	-9.4
5ajm	-9.3
5ajm	-9.3
5ajm	-9.3
5ajm	-9.3
5ajm	-9.3
4uo2	-9.3
4uo2	-9.3
4uo2	-9.3
4unx	-9.3
4pv9	-9.3
4fqr	-9.3
4fnk	-9.3
4ej8	-9.3
4ej8	-9.3
4e78	-9.3
4cr0	-9.3
4cqv	-9.3
4adf	-9.3
4adf	-9.3
4adf	-9.3
4adf	-9.3
4adf	-9.3
4adf	-9.3
3s13	-9.3
3r4b	-9.3
3r4b	-9.3
3ok9	-9.3
3gsr	-9.3
2wr0	-9.3
1hhk	-9.3
1hhh	-9.3
5ajm	-9.2
4uo2	-9.2
4uo2	-9.2
4uo2	-9.2
4unx	-9.2
4unx	-9.2
4mds	-9.2
4mds	-9.2
4m8x	-9.2
4kpq	-9.2
4gaj	-9.2
4gaj	-9.2
4fqr	-9.2
4e5f	-9.2
4e5e	-9.2
4cqu	-9.2
4cqu	-9.2
4cqu	-9.2
4cqu	-9.2
4cqu	-9.2
4cqu	-9.2
4bgx	-9.2
3vbh	-9.2
3v3m	-9.2
3gsw	-9.2
3gsw	-9.2
3gso	-9.2
3d0g	-9.2
3avl	-9.2
3ava	-9.2
3ava	-9.2
2zu5	-9.2
2hcs	-9.2
4m8y	-9.1
4k7f	-9.1
4fnk	-9.1
4e5g	-9.1
4bgx	-9.1
3zp3	-9.1
3v3m	-9.1
3sdy	-9.1
3sdy	-9.1
3sdy	-9.1
3rwi	-9.1
3rwh	-9.1
3rwh	-9.1
3gsq	-9.1
3gso	-9.1
3bw9	-9.1
2hu4	-9.1
2hu4	-9.1
2hu4	-9.1
1v3d	-9.1
1v3d	-9.1
4uo3	-9
4uo3	-9
4uo3	-9
4unx	-9
4qhn	-9
4mj0	-9
4lsu	-9
4ejl	-9
4cqr	-9
4cqr	-9
4cew	-9
3nf8	-9
3nf8	-9
3nf7	-9
3nf7	-9
3nf7	-9
3nf7	-9
3iyw	-9
3iyw	-9
3ggu	-9
3avj	-9
2hu4	-9
2bvp	-9
1hhj	-9
4uo3	-8.9
4uo3	-8.9
4m8y	-8.9
3zp6	-8.9
3vcl	-8.9
3se9	-8.9
3se8	-8.9
3se8	-8.9
3rwg	-8.9
3ku5	-8.9
3klv	-8.9
3iyw	-8.9
3iyw	-8.9
3iyw	-8.9
3i6l	-8.9
3ggu	-8.9
1izi	-8.9
4mj1	-8.8
4m30	-8.8
4m8x	-8.8
4jb9	-8.8
4i2p	-8.8
4fp8	-8.8
4fp8	-8.8
4ffz	-8.8
4cqs	-8.8
4cqs	-8.8
4cqp	-8.8
4cqp	-8.8
4cqp	-8.8
4cqp	-8.8
4cqp	-8.8
4cqp	-8.8
4bgw	-8.8
4bgw	-8.8
3zpb	-8.8
3zpb	-8.8
3vcl	-8.8
3rwg	-8.8
3ku5	-8.8
3ku3	-8.8
3iyw	-8.8
3b0w	-8.8
1v3e	-8.8
1v3e	-8.8
4uo6	-8.7
4kps	-8.7
4i7f	-8.7
4i2p	-8.7
4co6	-8.7
3zp2	-8.7
3zp0	-8.7
3nf8	-8.7
3alz	-8.7
2xra	-8.7
2wr7	-8.7
2vvx	-8.7
2vvx	-8.7
2vvw	-8.7
2oy0	-8.7
2htw	-8.7
1v3b	-8.7
4lst	-8.6
4lsr	-8.6
4iv3	-8.6
4hkj	-8.6
4dag	-8.6
4cqz	-8.6
3zpa	-8.6
3ku6	-8.6
3ku6	-8.6
3gsq	-8.6
2vvw	-8.6
2hty	-8.6
1v3b	-8.6
1b53	-8.6
4fqi	-8.5
4ejl	-8.5
4e5j	-8.5
4cqz	-8.5
4bh1	-8.5
4bh1	-8.5
4bh1	-8.5
4bgz	-8.5
3zp1	-8.5
3u82	-8.5
3u82	-8.5
3nwa	-8.5
3nwa	-8.5
3nfa	-8.5
3d0h	-8.5
2uv0	-8.5
2uv0	-8.5
2uv0	-8.5
2uv0	-8.5
2uv0	-8.5
2uv0	-8.5
2uv0	-8.5
2uv0	-8.5
2uv0	-8.5
2uv0	-8.5
2uv0	-8.5
2uv0	-8.5
2hu0	-8.5
2ht5	-8.5
1sk7	-8.5
1rzj	-8.5
4g8g	-8.4
4g8g	-8.4
4eq0	-8.4
4e76	-8.4
3nfa	-8.4
2zu4	-8.4
2mgu	-8.4
1izh	-8.4
4uo6	-8.3
4j6r	-8.3
4e5l	-8.3
3nf9	-8.3
3nf8	-8.3
3avh	-8.3
2z35	-8.3
2xi5	-8.3
2ge7	-8.3
1v2i	-8.3
1v2i	-8.3
1rv7	-8.3
1r6a	-8.3
1pk0	-8.3
1b50	-8.3
4mj1	-8.2
4lsu	-8.2
2xi5	-8.2
2wrf	-8.2
1v3c	-8.2
1v3c	-8.2
1v3c	-8.2
1v3c	-8.2
1p9s	-8.2
4qhl	-8.1
4mza	-8.1
4mza	-8.1
4mj0	-8.1
4mgu	-8.1
4mg3	-8.1
4mg3	-8.1
4i2q	-8.1
4bgy	-8.1
3lqa	-8.1
3avf	-8.1
2x83	-8.1
2x83	-8.1
2htu	-8.1
2gvf	-8.1
4wm7	-8
4lsv	-8
4eq0	-8
4bh4	-8
4bh2	-8
4bh2	-8
3oah	-8
3nwf	-8
3nfa	-8
3nfa	-8
3nf9	-8
3avn	-8
3avg	-8
3alx	-8
2wh6	-8
2oy0	-8
2ghw	-8
4gve	-7.9
4egt	-7.9
4cqx	-7.9
3o4l	-7.9
3i6g	-7.9
2wrc	-7.9
2iph	-7.9
2hcn	-7.9
1rzk	-7.9
4qrt	-7.8
4fb3	-7.8
3nf9	-7.8
3nf9	-7.8
3gsv	-7.8
1oop	-7.8
4mmr	-7.7
4g9f	-7.7
4fvu	-7.7
3gsv	-7.7
3avk	-7.7
2vvy	-7.7
4oph	-7.6
4dkq	-7.6
4dkp	-7.6
3ztn	-7.6
3vbf	-7.6
3vbf	-7.6
3su6	-7.6
3rwi	-7.6
3mj5	-7.6
3mj5	-7.6
3gsw	-7.6
2q7c	-7.6
2c36	-7.6
4qru	-7.5
4pv8	-7.5
4lsp	-7.5
4f3z	-7.5
4dgd	-7.5
4cdu	-7.5
4cdq	-7.5
3uf5	-7.5
3avc	-7.5
3avb	-7.5
3avb	-7.5
3ava	-7.5
2iph	-7.5
2iph	-7.5
1rq9	-7.5
4oyd	-7.4
4mms	-7.4
4i32	-7.4
4i31	-7.4
4i31	-7.4
4f3i	-7.4
4e92	-7.4
4e92	-7.4
4cqy	-7.4
4cey	-7.4
3oah	-7.4
3nf6	-7.4
3nf6	-7.4
3avl	-7.4
3ava	-7.4
2q7c	-7.4
2q7c	-7.4
2lsp	-7.4
2iph	-7.4
2ge8	-7.4
2c36	-7.4
4qrt	-7.3
4fqi	-7.3
4f3i	-7.3
4cdw	-7.3
3su1	-7.3
3avb	-7.3
3avb	-7.3
2zty	-7.3
2ghv	-7.3
2c7u	-7.3
4pv8	-7.2
4fqi	-7.2
4dko	-7.2
3w39	-7.2
3sud	-7.2
3ro5	-7.2
3pqy	-7.2
2yka	-7.2
1yh3	-7.2
1n59	-7.2
papain_protease	-7.1
4qrt	-7.1
4iv1	-7.1
4cdx	-7.1
4b8e	-7.1
3gsu	-7.1
3gsu	-7.1
3avh	-7.1
3a07	-7.1
1qz8	-7.1
4bh4	-7
4bh4	-7
4bh4	-7
3su2	-7
3su2	-7
3su2	-7
3su0	-7
3sis	-7
3rwj	-7
3rwj	-7
3rwf	-7
3gsx	-7
3gsx	-7
3gsr	-7
3avg	-7
2zu1	-7
2xya	-7
2wr3	-7
4gye	-6.9
4ejd	-6.9
4dgd	-6.9
4dgc	-6.9
4dgc	-6.9
4dgc	-6.9
4dgc	-6.9
4dgc	-6.9
4dgc	-6.9
3sis	-6.9
2xpx	-6.9
2g69	-6.9
2ca1	-6.9
4lss	-6.8
4ejd	-6.8
4e5i	-6.8
2wh6	-6.8
2g69	-6.8
spike_RBD	-6.7
4oyd	-6.7
4jkp	-6.7
4gv9	-6.7
4ffy	-6.7
4dgb	-6.7
4dgb	-6.7
4b8e	-6.7
4b4n	-6.7
4b4n	-6.7
3rkc	-6.7
3nw8	-6.7
3m5h	-6.7
3kmq	-6.7
2yol	-6.7
2bvq	-6.7
1rpi	-6.7
1rpi	-6.7
4jpk	-6.6
4i33	-6.6
4dmn	-6.6
4b8e	-6.6
3sv8	-6.6
3su3	-6.6
3su3	-6.6
3sit	-6.6
3sit	-6.6
3sit	-6.6
3sit	-6.6
3sit	-6.6
3sit	-6.6
3gzf	-6.6
2zol	-6.6
2me2	-6.6
4lkj	-6.5
4g9z	-6.5
4g9z	-6.5
4fqv	-6.5
4ep3	-6.5
4ep3	-6.5
4ejd	-6.5
4e91	-6.5
4dmn	-6.5
4dkr	-6.5
4bh3	-6.5
4bh3	-6.5
4bh3	-6.5
4bh3	-6.5
3vie	-6.5
3sv6	-6.5
3su5	-6.5
3su5	-6.5
3su5	-6.5
3su0	-6.5
2ztz	-6.5
2xze	-6.5
1sys	-6.5
1qr8	-6.5
4nwl	-6.4
4fqv	-6.4
4eee	-6.4
3su6	-6.4
3su4	-6.4
3su4	-6.4
3su1	-6.4
3ifu	-6.4
2yhf	-6.4
2v6q	-6.4
1f08	-6.4
4gzf	-6.3
4gzf	-6.3
4gv3	-6.3
4gv3	-6.3
4ejd	-6.3
4ejd	-6.3
4ejd	-6.3
3sv9	-6.3
3sv9	-6.3
3rwf	-6.3
3p8n	-6.3
3b71	-6.3
3b71	-6.3
2xpx	-6.3
2vxw	-6.3
4nwk	-6.2
4jpj	-6.2
4jkp	-6.2
3sv6	-6.2
3suf	-6.2
3sud	-6.2
3kms	-6.2
3gsn	-6.2
3bwa	-6.2
4mmt	-6.1
4epj	-6.1
3u83	-6.1
3u83	-6.1
3sv7	-6.1
3s12	-6.1
3d0i	-6.1
2wfo	-6.1
2wfo	-6.1
2axf	-6.1
2axf	-6.1
4u6h	-6
4nwk	-6
4ejd	-6
4ejd	-6
3sv7	-6
3sug	-6
2yhh	-6
2xze	-6
3uqi	-5.9
3p8o	-5.9
3avj	-5.9
2y1s	-5.9
2q5u	-5.9
2c86	-5.9
4gye	-5.8
4ejk	-5.8
2yol	-5.8
2q7c	-5.8
2q7c	-5.8
2q5u	-5.8
2q5u	-5.8
2q5u	-5.8
2q5u	-5.8
2q5u	-5.8
4mze	-5.7
4mze	-5.7
4mmv	-5.7
4ejr	-5.7
2x9m	-5.7
2q7c	-5.7
2c3a	-5.7
4mod	-5.6
4mod	-5.6
4ejd	-5.6
3vtt	-5.6
3uqi	-5.6
3sue	-5.6
3avc	-5.6
4ejk	-5.5
4adq	-5.5
3sug	-5.5
3avk	-5.5
4ekx	-5.4
4c1w	-5.4
3i6k	-5.4
3giv	-5.4
3alw	-5.4
2me4	-5.4
2m3l	-5.4
2l2f	-5.4
4g9d	-5.3
4dga	-5.3
1qr9	-5.3
4c1w	-5.2
4adq	-5.2
3vtt	-5.2
1z8r	-5.2
3kqk	-5.1
2mkr	-5.1
1zsd	-5.1
2zu3	-5
2me3	-5
4ipz	-4.9
4ejk	-4.9
2m3m	-4.9
2hfz	-4.9
4ipz	-4.8
4ipz	-4.8
4g8i	-4.8
4g8i	-4.8
3zd0	-4.8
3avn	-4.8
2vxj	-4.8
4ipz	-4.7
4ipz	-4.7
4g9d	-4.7
4dga	-4.7
4ep2	-4.6
4ep2	-4.6
3j23	-4.5
3j22	-4.5
4ipz	-4
3vie	-4
4uo4	-3.5
4uo8	-3.3
4ipz	-3.3
4eqj	-3
4ipz	-2.9
4qhm	-2.8
4ipz	-2.8
4ipz	-2.7
4ipz	-2.6
4ipz	-2.4
4epj	-1.8
2l3h	-1.7
4dge	-1.6
2zsv	-1.1
2zsv	-1.1
3m5i	-1
4gu4	-0.9
4gu4	-0.9
4gu4	-0.9
4gu4	-0.9
4gu4	-0.9
4gu4	-0.9
4e0r	-0.7
4gu3	-0.4
4gu3	-0.4
4gu3	-0.4
4gu3	-0.4
4gu3	-0.4
4gu3	-0.3
4gu3	-0.3
4gu3	-0.3
4gu3	-0.3
4gu3	-0.3
4gu3	-0.3
4gu3	-0.3
4fqm	-0.3

[truncated: 2 more sheets: Dihydroergotamine, Rutin]
