# Supplementary material for: Accelerating the repurposing of FDA-approved drugs against coronavirus disease-19 (COVID-19)
Source: PubMed Central journal article supplement — RSC Adv. 2020 Nov 10;10(67):40867–75. doi: 10.1039/d0ra09010g (PMC9057693; doi:10.1039/d0ra09010g), 2020-11-10
Supplement: RA-010-D0RA09010G-s001.pdf [file RA-010-D0RA09010G-s001.pdf]

## Supporting Information

# Accelerating the repurposing of FDA-approved drugs against Coronavirus Disease-19 (COVID-19)

*Simona De Vita,<sup>a</sup> Maria Giovanna Chini,<sup>b</sup> Gianluigi Lauro,<sup>a,\*</sup> and Giuseppe Bifulco,<sup>a,\*</sup>*

<sup>a</sup>Department of Pharmacy, University of Salerno, Via Giovanni Paolo II 132, Fisciano 84084, Italy

<sup>b</sup>Department of Biosciences and Territory University of Molise Via De Sanctis - 86100 - Campobasso (CB) Contrada Fonte Lappone  
- 86090 - Pesche (IS)

\*To whom correspondence should be addressed: [glauro@unisa.it](mailto:glauro@unisa.it), Telephone: +39 (0)89 9969176;  
[bifulco@unisa.it](mailto:bifulco@unisa.it), Telephone: +39 (0)89 969741

**Table S1.** Ligand structure (SMILES) and CAS ID of the selected compounds (See also Table 1 in the main text).

| Ligand            | SMILES                                                                                                                                                                                    | CAS          |
|-------------------|-------------------------------------------------------------------------------------------------------------------------------------------------------------------------------------------|--------------|
| Olaparib          | <chem>c1cccc2c1c(n[nH]c2=O)Cc1cc(c(cc1)F)C(=O)N1CCN(CC1)C(=O)C1CC1</chem>                                                                                                                 | 763113-22-0  |
| Dutasteride       | <chem>C1=C[C@]2([C@H](NC1=O)CC[C@@H]1[C@@H]2CC[C@]2([C@H]1CC[C@@H]2C(=O)Nc1cc(ccc1C(F)(F)F)C(F)(F)F)C)C</chem>                                                                            | 164656-23-9  |
| Dolutegravir      | <chem>c1(cc(c(cc1)CNC(=O)c1cn2c(c(c1=O)[O-])C(=O)N1[C@H](C2)OCC[C@H]1C)F)F</chem>                                                                                                         | 1051375-16-6 |
| Conivaptan        | <chem>C(=O)(Nc1ccc(cc1)C(=O)N1c2c(c3c(CC1)[nH+]c([nH]3)C)cccc2)c1c(cccc1)c1cccc1</chem>                                                                                                   | 168626-94-6  |
| Velpatasvir       | <chem>c1cccc(c1)[C@H](C(=O)N1C[C@H](C[C@H]1c1[nH]c(c1)C)C(=O)N1C[C@H](C[C@H]1c1[nH]c(c1)COc1c2cc2c(c1)c1c(cc2)nc([nH]1)[C@H]1N([C@H](CC1)C)C(=O)[C@@H](NC(=O)OC)C(C)C)COC)NC(=O)OC</chem> | 1377049-84-7 |
| Lomitapide        | <chem>[N@H+]1(CC[C@H](CC1)NC(=O)c1c(cccc1)c1ccc(cc1)C(F)(F)F)CCCC[C@]1(c2c(c3c1cccc3)cccc2)C(=O)NC(C(F)(F)F)</chem>                                                                       | 182431-12-5  |
| Entrectinib       | <chem>c1cc2c(cc1Cc1cc(cc(c1)F)F)c(n[nH]2)NC(=O)c1ccc(cc1NC1CCOCC1)N1CCN(CC1)C</chem>                                                                                                      | 1108743-60-7 |
| Bromocriptine     | <chem>N12[C@]([C@H]3N(C(=O)[C@@H]2CC(C)C)CCC3)(O[C@](C1=O)(NC(=O)[C@@H]1C=C2c3c4c(C[C@@H]2N(C1)C)c([nH]c4ccc3)Br)C(C)C)O</chem>                                                           | 22260-51-1   |
| Peficitinib       | <chem>C1[C@@H]2CC3(C[C@@H](C2NC4=C5C=CNC5=NC=C4C(=O)N)CC1C3)O</chem>                                                                                                                      | 944118-01-8  |
| Dihydroergotamine | <chem>C1[C@@H]2c3cccc4[nH]cc(c34)C[C@@H]2[N@@H+](C)C[C@@H]1C(=O)N[C@@]1(C)C(=O)N2[C@@H](Cc3cccc3)C(=O)N3CCC[C@H]3[C@@]2(O)O</chem>                                                        | 6190-39-2    |
| Rutin             | <chem>c1(c(c(=O)c2c(o1)cc(cc2O)O)O)[C@H]1O[C@@H](CO[C@H]2[C@@H]([C@@H]([C@@H]([C@@H](O2)C)O)O)O)[C@@H]([C@@H]([C@H]1O)O)O)c1cc(c(cc1)O)O</chem>                                           | 207671-50-9  |

**Table S2.** Predicted docking score of Olaparib against the viral protein panel.

| <b>PDB</b> | <b>Docking score</b> | <b>PDB</b> | <b>Docking score</b> | <b>PDB</b> | <b>Docking score</b> |
|------------|----------------------|------------|----------------------|------------|----------------------|
| 4wm7       | -11.80               | 4k7f       | -10.80               | 4uo7       | -10.50               |
| 3t3c       | -11.80               | 4g43       | -10.80               | 4uo7       | -10.50               |
| 3t3c       | -11.80               | 4g42       | -10.80               | 4uo7       | -10.50               |
| 4lsv       | -11.60               | 4cey       | -10.80               | 4uo7       | -10.50               |
| 4j4x       | -11.60               | 3rwi       | -10.80               | 4uo0       | -10.50               |
| 2wrc       | -11.60               | 3rwd       | -10.80               | 4uo0       | -10.50               |
| 2wr3       | -11.60               | 3kna       | -10.80               | 4uo0       | -10.50               |
| 3nxu       | -11.50               | 3b0w       | -10.80               | 4uo0       | -10.50               |
| 2wrh       | -11.50               | 2wre       | -10.80               | 4uo0       | -10.50               |
| 2wrf       | -11.50               | 2hjk       | -10.80               | 4uo0       | -10.50               |
| 4i2p       | -11.40               | 2bvo       | -10.80               | 4uo0       | -10.50               |
| 2i4v       | -11.40               | 2axg       | -10.80               | 4uo0       | -10.50               |
| 4o4g       | -11.30               | 1ida       | -10.80               | 4uo0       | -10.50               |
| 3kql       | -11.30               | 4qrs       | -10.70               | 4uo0       | -10.50               |
| 3kql       | -11.30               | 3klv       | -10.70               | 4uo0       | -10.50               |
| 3kql       | -11.30               | 3bwa       | -10.70               | 4uo0       | -10.50               |
| 2bvp       | -11.30               | 1syv       | -10.70               | 4uo0       | -10.50               |
| 3fku       | -11.20               | 1hhh       | -10.70               | 4uo0       | -10.50               |
| 4mmr       | -11.10               | 4uo3       | -10.60               | 4rw7       | -10.50               |
| 4e78       | -11.10               | 4uo3       | -10.60               | 4qru       | -10.50               |
| 4e78       | -11.10               | 4uo3       | -10.60               | 4i7f       | -10.50               |
| 4e7a       | -11.00               | 4uo3       | -10.60               | 4fnk       | -10.50               |
| 4e7a       | -11.00               | 4uo3       | -10.60               | 4cdw       | -10.50               |
| 4cdu       | -11.00               | 4uo0       | -10.60               | 3kqn       | -10.50               |
| 3s11       | -11.00               | 4uo0       | -10.60               | 3hky       | -10.50               |
| 3rwe       | -11.00               | 4uo0       | -10.60               | 3hkw       | -10.50               |
| 2wrg       | -11.00               | 4uo0       | -10.60               | 3gsr       | -10.50               |
| 2wrg       | -11.00               | 4qru       | -10.60               | 3gso       | -10.50               |
| 2wrg       | -11.00               | 4e5e       | -10.60               | 2wre       | -10.50               |
| 2wrg       | -11.00               | 4cew       | -10.60               | 4uo7       | -10.40               |
| 2wrg       | -11.00               | 4cdq       | -10.60               | 4rw6       | -10.40               |
| 1oop       | -11.00               | 3u7s       | -10.60               | 4mkb       | -10.40               |
| 4u6h       | -10.90               | 3u7s       | -10.60               | 4gua       | -10.40               |
| 4qrs       | -10.90               | 3rwh       | -10.60               | 4g9z       | -10.40               |
| 4q6r       | -10.90               | 3rwh       | -10.60               | 4g9f       | -10.40               |
| 4q6r       | -10.90               | 3rwc       | -10.60               | 4cqy       | -10.40               |
| 4k7f       | -10.90               | 3rwc       | -10.60               | 4cdx       | -10.40               |
| 4j4w       | -10.90               | 3kqn       | -10.60               | 3vcl       | -10.40               |
| 4i2q       | -10.90               | 3kqn       | -10.60               | 3vcl       | -10.40               |
| 4f3z       | -10.90               | 3gsq       | -10.60               | 3rwg       | -10.40               |
| 3rwe       | -10.90               | 3gso       | -10.60               | 3rwg       | -10.40               |
| 3koa       | -10.90               | 3ggg       | -10.60               | 3r4b       | -10.40               |
| 3i6l       | -10.90               | 3bwa       | -10.60               | 3bw9       | -10.40               |
| 2i4x       | -10.90               | 1r6a       | -10.60               | 3bw9       | -10.40               |
| 1klm       | -10.90               | 1p9u       | -10.60               | 3bew       | -10.40               |
| 4wm8       | -10.80               | 4uo7       | -10.50               | 2ygc       | -10.40               |

| PDB  | Docking score | PDB  | Docking score | PDB  | Docking score |
|------|---------------|------|---------------|------|---------------|
| 2i4d | -10.40        | 3gsw | -10.20        | 4mkb | -9.90         |
| 1hhk | -10.40        | 3gsq | -10.20        | 4m8y | -9.90         |
| 1hhj | -10.40        | 2wr2 | -10.20        | 4lst | -9.90         |
| 1hhi | -10.40        | 1izh | -10.20        | 4j4v | -9.90         |
| 4uo5 | -10.30        | 4pv9 | -10.10        | 4j4v | -9.90         |
| 4uo5 | -10.30        | 4mgu | -10.10        | 4j4v | -9.90         |
| 4uo5 | -10.30        | 4lsr | -10.10        | 4j4v | -9.90         |
| 4unx | -10.30        | 4j4u | -10.10        | 4j4s | -9.90         |
| 4rw9 | -10.30        | 3cj0 | -10.10        | 4j4s | -9.90         |
| 4o44 | -10.30        | 2wre | -10.10        | 4fnk | -9.90         |
| 4j4r | -10.30        | 2wr1 | -10.10        | 3n0i | -9.90         |
| 4g9z | -10.30        | 2wr1 | -10.10        | 3lkh | -9.90         |
| 3r4b | -10.30        | 2wa1 | -10.10        | 3iyw | -9.90         |
| 3d0h | -10.30        | 2hcs | -10.10        | 3iyw | -9.90         |
| 3bev | -10.30        | 1izi | -10.10        | 3h98 | -9.90         |
| 3alw | -10.30        | 1a41 | -10.10        | 3ggg | -9.90         |
| 2ygc | -10.30        | 4uny | -10.00        | 3cj5 | -9.90         |
| 2wr2 | -10.30        | 4qhk | -10.00        | 3ciz | -9.90         |
| 2wr0 | -10.30        | 4opa | -10.00        | 3ciz | -9.90         |
| 2wr0 | -10.30        | 4mka | -10.00        | 2ygb | -9.90         |
| 2wr0 | -10.30        | 4mk7 | -10.00        | 2ygb | -9.90         |
| 2wr0 | -10.30        | 4mk7 | -10.00        | 4unw | -9.80         |
| 2wr0 | -10.30        | 4lkj | -10.00        | 4unw | -9.80         |
| 2i4w | -10.30        | 4j6r | -10.00        | 4rw8 | -9.80         |
| 2i4u | -10.30        | 4hkj | -10.00        | 4m30 | -9.80         |
| 2gec | -10.30        | 4fqv | -10.00        | 4kps | -9.80         |
| 2gec | -10.30        | 4fqv | -10.00        | 4j4v | -9.80         |
| 1quv | -10.30        | 4fqj | -10.00        | 4ej8 | -9.80         |
| 4uo2 | -10.20        | 3ztj | -10.00        | 4e5l | -9.80         |
| 4uo2 | -10.20        | 3vbo | -10.00        | 3vbr | -9.80         |
| 4uo2 | -10.20        | 3lkh | -10.00        | 3ok9 | -9.80         |
| 4uo2 | -10.20        | 3kqh | -10.00        | 3oah | -9.80         |
| 4uo2 | -10.20        | 3kms | -10.00        | 3mj5 | -9.80         |
| 4uo2 | -10.20        | 3iyw | -10.00        | 3mj5 | -9.80         |
| 4unx | -10.20        | 3iyw | -10.00        | 3cj5 | -9.80         |
| 4unx | -10.20        | 3iyw | -10.00        | 3cj2 | -9.80         |
| 4unx | -10.20        | 3iyw | -10.00        | 3cj2 | -9.80         |
| 4rw4 | -10.20        | 3gsx | -10.00        | 3cj0 | -9.80         |
| 4rw4 | -10.20        | 3gsx | -10.00        | 2hu0 | -9.80         |
| 4mka | -10.20        | 2wr1 | -10.00        | 1v3d | -9.80         |
| 4mk9 | -10.20        | 2uv0 | -10.00        | 1v3d | -9.80         |
| 4mk9 | -10.20        | 2uv0 | -10.00        | 1pk0 | -9.80         |
| 4j4y | -10.20        | 2htw | -10.00        | 4unw | -9.70         |
| 4fqr | -10.20        | 4uo3 | -9.90         | 4jo8 | -9.70         |
| 4fqr | -10.20        | 4uo3 | -9.90         | 4fvu | -9.70         |
| 4a92 | -10.20        | 4uo3 | -9.90         | 4ejl | -9.70         |
| 4a92 | -10.20        | 4uo3 | -9.90         | 4ej8 | -9.70         |
| 3gsw | -10.20        | 4uo3 | -9.90         | 4e5f | -9.70         |

| PDB       | Docking score | PDB  | Docking score | PDB  | Docking score |
|-----------|---------------|------|---------------|------|---------------|
| 4cqw      | -9.70         | 3hky | -9.50         | 4jb9 | -9.30         |
| 4bh0      | -9.70         | 3cj4 | -9.50         | 4eee | -9.30         |
| 4bac      | -9.70         | 3alx | -9.50         | 3tid | -9.30         |
| 3sdy      | -9.70         | 2wr2 | -9.50         | 3nf8 | -9.30         |
| 3sdy      | -9.70         | 2vvw | -9.50         | 3gsr | -9.30         |
| 3pqy      | -9.70         | 2vvw | -9.50         | 3d23 | -9.30         |
| 3n0i      | -9.70         | 2uv0 | -9.50         | 3cj4 | -9.30         |
| 3hkw      | -9.70         | 2uv0 | -9.50         | 2xi5 | -9.30         |
| 3h98      | -9.70         | 2uv0 | -9.50         | 2xi5 | -9.30         |
| 3h2l      | -9.70         | 2uv0 | -9.50         | 2mgu | -9.30         |
| 3gsv      | -9.70         | 2uv0 | -9.50         | 1v3e | -9.30         |
| 3gsv      | -9.70         | 2uv0 | -9.50         | 4i2q | -9.20         |
| 3gsu      | -9.70         | 2uv0 | -9.50         | 4e5g | -9.20         |
| 3gsu      | -9.70         | 2hty | -9.50         | 4dag | -9.20         |
| 3d0g      | -9.70         | 1v2i | -9.50         | 4bgy | -9.20         |
| 3cj3      | -9.70         | 1n5a | -9.50         | 3kmq | -9.20         |
| 3cj3      | -9.70         | 4pg2 | -9.40         | 2xra | -9.20         |
| 2wre      | -9.70         | 4mj1 | -9.40         | 2wr7 | -9.20         |
| 2wre      | -9.70         | 4mds | -9.40         | 2wr4 | -9.20         |
| 2uv0      | -9.70         | 4i2p | -9.40         | 1n59 | -9.20         |
| 1idb      | -9.70         | 4fqi | -9.40         | 4uo6 | -9.10         |
| 1b53      | -9.70         | 4fqi | -9.40         | 4uo6 | -9.10         |
| 4uo8      | -9.60         | 4f3i | -9.40         | 4mg3 | -9.10         |
| 4mk8      | -9.60         | 4cr0 | -9.40         | 4gaj | -9.10         |
| 4m8x      | -9.60         | 4adf | -9.40         | 4e5j | -9.10         |
| 4lsu      | -9.60         | 4adf | -9.40         | 4dgd | -9.10         |
| 4iv3      | -9.60         | 4adf | -9.40         | 3u82 | -9.10         |
| 4ejl      | -9.60         | 4adf | -9.40         | 3u82 | -9.10         |
| 3hkw      | -9.60         | 4adf | -9.40         | 3tie | -9.10         |
| 3h2l      | -9.60         | 4adf | -9.40         | 3tie | -9.10         |
| 2wre      | -9.60         | 3se9 | -9.40         | 3se8 | -9.10         |
| 2uv0      | -9.60         | 3sdy | -9.40         | 3se8 | -9.10         |
| Spike RBD | -9.50         | 3nf8 | -9.40         | 3rki | -9.10         |
| 4mze      | -9.50         | 3mlh | -9.40         | 3ku3 | -9.10         |
| 4mze      | -9.50         | 3i6g | -9.40         | 3ku3 | -9.10         |
| 4mk8      | -9.50         | 3cpl | -9.40         | 2z35 | -9.10         |
| 4mj0      | -9.50         | 3cpl | -9.40         | 1v3e | -9.10         |
| 4m8y      | -9.50         | 2vvx | -9.40         | 4gaj | -9.00         |
| 4m8x      | -9.50         | 2vvx | -9.40         | 4g9f | -9.00         |
| 4lsu      | -9.50         | 2hu4 | -9.40         | 4e5i | -9.00         |
| 4jpk      | -9.50         | 2hu4 | -9.40         | 4bh4 | -9.00         |
| 4gag      | -9.50         | 2hu4 | -9.40         | 4bh4 | -9.00         |
| 4gag      | -9.50         | 2hu4 | -9.40         | 4bh4 | -9.00         |
| 4f3i      | -9.50         | 1v2i | -9.40         | 4bh4 | -9.00         |
| 4e92      | -9.50         | 4pv9 | -9.30         | 3ro5 | -9.00         |
| 4e91      | -9.50         | 4pv9 | -9.30         | 3nwf | -9.00         |
| 4e76      | -9.50         | 4mms | -9.30         | 3nf7 | -9.00         |
| 3tid      | -9.50         | 4mds | -9.30         | 3bwa | -9.00         |

| PDB  | Docking score | PDB      | Docking score | PDB  | Docking score |
|------|---------------|----------|---------------|------|---------------|
| 3avf | -9.00         | 4gv3     | -8.70         | 4gu3 | -8.60         |
| 2xwy | -9.00         | 4gu4     | -8.70         | 4gu3 | -8.60         |
| 2x83 | -9.00         | 4gu4     | -8.70         | 4gu3 | -8.60         |
| 2uv0 | -9.00         | 4gu4     | -8.70         | 4g8g | -8.60         |
| 2oy0 | -9.00         | 4gu4     | -8.70         | 4dgc | -8.60         |
| 2iph | -9.00         | 4gu4     | -8.70         | 4dgc | -8.60         |
| 2ghw | -9.00         | 4gu4     | -8.70         | 4dgc | -8.60         |
| 1v3c | -9.00         | 4g8g     | -8.70         | 4dgc | -8.60         |
| 1v3b | -9.00         | 4fqy     | -8.70         | 4cqy | -8.60         |
| 4qhn | -8.90         | 4fqy     | -8.70         | 3zp6 | -8.60         |
| 4pv8 | -8.90         | 4cqx     | -8.70         | 3zp1 | -8.60         |
| 4mg3 | -8.90         | 4cqr     | -8.70         | 3zp0 | -8.60         |
| 4gzf | -8.90         | 4cqy     | -8.70         | 3s13 | -8.60         |
| 4gzf | -8.90         | 4bh3     | -8.70         | 3nf6 | -8.60         |
| 4egt | -8.90         | 4bh3     | -8.70         | 3nf6 | -8.60         |
| 3v3m | -8.90         | 4bh3     | -8.70         | 2x5i | -8.60         |
| 3v3m | -8.90         | 4bh3     | -8.70         | 2ht5 | -8.60         |
| 3sv8 | -8.90         | 4bgw     | -8.70         | 1v3b | -8.60         |
| 3ebj | -8.90         | 4bgw     | -8.70         | 4jkg | -8.50         |
| 2x83 | -8.90         | 3zp2     | -8.70         | 4iv1 | -8.50         |
| 2oy0 | -8.90         | 3o4l     | -8.70         | 4fp8 | -8.50         |
| 2iph | -8.90         | 3d0i     | -8.70         | 4fp8 | -8.50         |
| 2iph | -8.90         | 3ava     | -8.70         | 4ejd | -8.50         |
| 2ge7 | -8.90         | 3ava     | -8.70         | 4ejd | -8.50         |
| 1v3c | -8.90         | 3alz     | -8.70         | 4ejd | -8.50         |
| 4fqi | -8.80         | 2c36     | -8.70         | 4dgc | -8.50         |
| 4ffz | -8.80         | 2c36     | -8.70         | 4dgc | -8.50         |
| 4cqy | -8.80         | 1b50     | -8.70         | 4cqu | -8.50         |
| 4cqp | -8.80         | Main     | -8.60         | 4bh2 | -8.50         |
| 4cqp | -8.80         | protease | -8.60         | 4bh2 | -8.50         |
| 4cqp | -8.80         | 5ajm     | -8.60         | 3lqa | -8.50         |
| 4bgz | -8.80         | 5ajm     | -8.60         | 3ku5 | -8.50         |
| 3zpb | -8.80         | 5ajm     | -8.60         | 3ku5 | -8.50         |
| 3zpb | -8.80         | 5ajm     | -8.60         | 3iyp | -8.50         |
| 3zp3 | -8.80         | 5ajm     | -8.60         | 3avn | -8.50         |
| 3vbh | -8.80         | 5ajm     | -8.60         | 2htu | -8.50         |
| 3ku6 | -8.80         | 4qrt     | -8.60         | 1rzk | -8.50         |
| 3ku6 | -8.80         | 4mmu     | -8.60         | 4qhl | -8.40         |
| 3d23 | -8.80         | 4kpq     | -8.60         | 4jkg | -8.40         |
| 3avl | -8.80         | 4gu3     | -8.60         | 4fb3 | -8.40         |
| 2iph | -8.80         | 4gu3     | -8.60         | 4eq0 | -8.40         |
| 1v3c | -8.80         | 4gu3     | -8.60         | 4cqu | -8.40         |
| 1sys | -8.80         | 4gu3     | -8.60         | 4cqu | -8.40         |
| 1sk7 | -8.80         | 4gu3     | -8.60         | 4cqu | -8.40         |
| 1r6a | -8.80         | 4gu3     | -8.60         | 4cqu | -8.40         |
| 4i31 | -8.70         | 4gu3     | -8.60         | 3nw8 | -8.40         |
| 4i31 | -8.70         | 4gu3     | -8.60         | 3nfa | -8.40         |
| 4gv3 | -8.70         | 4gu3     | -8.60         | 3nfa | -8.40         |

| PDB  | Docking score | PDB  | Docking score | PDB  | Docking score |
|------|---------------|------|---------------|------|---------------|
| 3nf9 | -8.40         | 4gve | -8.10         | 2xpx | -7.90         |
| 3nf9 | -8.40         | 4dkp | -8.10         | 2me4 | -7.90         |
| 3nf6 | -8.40         | 4bgx | -8.10         | 2ge8 | -7.90         |
| 3avj | -8.40         | 4bgx | -8.10         | 4oph | -7.80         |
| 3avc | -8.40         | 3ztn | -8.10         | 4mj1 | -7.80         |
| 4qru | -8.30         | 3zpa | -8.10         | 4lkk | -7.80         |
| 4pv8 | -8.30         | 3su1 | -8.10         | 4eqj | -7.80         |
| 4mza | -8.30         | 3rwj | -8.10         | 4dko | -7.80         |
| 4jpi | -8.30         | 3rwj | -8.10         | 4bh1 | -7.80         |
| 4eq0 | -8.30         | 3rwi | -8.10         | 4bh1 | -7.80         |
| 4cqu | -8.30         | 3nfa | -8.10         | 4bh1 | -7.80         |
| 3uf5 | -8.30         | 3nf7 | -8.10         | 3su2 | -7.80         |
| 3p8o | -8.30         | 3nf7 | -8.10         | 3rwf | -7.80         |
| 3nwa | -8.30         | 3avl | -8.10         | 3rwf | -7.80         |
| 3nwa | -8.30         | 3avg | -8.10         | 3a07 | -7.80         |
| 3nf9 | -8.30         | 3avb | -8.10         | 2wh6 | -7.80         |
| 3nf9 | -8.30         | 2zu4 | -8.10         | 2q7c | -7.80         |
| 3nf8 | -8.30         | 2yol | -8.10         | 2q7c | -7.80         |
| 3nf8 | -8.30         | 2yol | -8.10         | 2q7c | -7.80         |
| 3nf6 | -8.30         | 2axf | -8.10         | 2lsp | -7.80         |
| 2zu5 | -8.30         | 4qrt | -8.00         | 1rpi | -7.80         |
| 2wh6 | -8.30         | 4lss | -8.00         | 1rpi | -7.80         |
| 2hcn | -8.30         | 4g9d | -8.00         | 4mj0 | -7.70         |
| 2c7u | -8.30         | 4cqz | -8.00         | 4gye | -7.70         |
| 1yh3 | -8.30         | 4cqz | -8.00         | 4gye | -7.70         |
| 1rzj | -8.30         | 4cqq | -8.00         | 4g1o | -7.70         |
| 4mza | -8.20         | 4co6 | -8.00         | 4ejd | -7.70         |
| 4ep3 | -8.20         | 3sv7 | -8.00         | 4ejd | -7.70         |
| 4ep3 | -8.20         | 3suf | -8.00         | 4ejd | -7.70         |
| 4dgd | -8.20         | 3oah | -8.00         | 3su3 | -7.70         |
| 4cqs | -8.20         | 3avh | -8.00         | 3su3 | -7.70         |
| 4cqs | -8.20         | 3ava | -8.00         | 3su2 | -7.70         |
| 4cqr | -8.20         | 3ava | -8.00         | 3su2 | -7.70         |
| 4cqp | -8.20         | 2xze | -8.00         | 3su1 | -7.70         |
| 4cqp | -8.20         | 2vvy | -8.00         | 3su0 | -7.70         |
| 4cqp | -8.20         | 2bvq | -8.00         | 3sud | -7.60         |
| 3nfa | -8.20         | 4uo4 | -7.90         | 3sit | -7.60         |
| 3nf7 | -8.20         | 4qrt | -7.90         | 3sit | -7.60         |
| 3avh | -8.20         | 4mmv | -7.90         | 3sit | -7.60         |
| 3avg | -8.20         | 4mmt | -7.90         | 3sit | -7.60         |
| 3avb | -8.20         | 4i32 | -7.90         | 3sit | -7.60         |
| 3avb | -8.20         | 4dkq | -7.90         | 3sit | -7.60         |
| 3avb | -8.20         | 3vbf | -7.90         | 3gsw | -7.60         |
| 2ghv | -8.20         | 3vbf | -7.90         | 2ztz | -7.60         |
| 2axf | -8.20         | 3uqi | -7.90         | 4gv9 | -7.50         |
| 1v3c | -8.20         | 3uqi | -7.90         | 4ffy | -7.50         |
| 1rv7 | -8.20         | 3su6 | -7.90         | 4ejd | -7.50         |
| 1p9s | -8.20         | 2xpx | -7.90         | 4ejd | -7.50         |

| PDB      | Docking score | PDB  | Docking score | PDB  | Docking score |
|----------|---------------|------|---------------|------|---------------|
| 4ejd     | -7.50         | 2xya | -7.10         | 2zol | -6.70         |
| 4e92     | -7.50         | 2wfo | -7.10         | 4oyd | -6.60         |
| 4dga     | -7.50         | 2ca1 | -7.10         | 4nwk | -6.60         |
| 4dga     | -7.50         | 1qz8 | -7.10         | 3u83 | -6.60         |
| 4c1w     | -7.50         | 4lcx | -7.00         | 3avn | -6.60         |
| 3su0     | -7.50         | 3sv9 | -7.00         | 2yhh | -6.60         |
| 2yka     | -7.50         | 3sv6 | -7.00         | 2y1s | -6.60         |
| 2me2     | -7.50         | 3sv6 | -7.00         | 4nwl | -6.50         |
| 1rq9     | -7.50         | 3sud | -7.00         | 4b4n | -6.50         |
| 4oyd     | -7.40         | 3su5 | -7.00         | 4b4n | -6.50         |
| 4b8e     | -7.40         | 3su4 | -7.00         | 3u83 | -6.50         |
| 4b8e     | -7.40         | 3su4 | -7.00         | 2v6q | -6.50         |
| 4b8e     | -7.40         | 3gzf | -7.00         | 2l2f | -6.50         |
| 3w39     | -7.40         | 2zty | -7.00         | 4g1l | -6.40         |
| 3rkc     | -7.40         | 1qr8 | -7.00         | 3avk | -6.40         |
| 3p8n     | -7.40         | 4i33 | -6.90         | 4ipz | -6.30         |
| 4lkh     | -7.30         | 4g8i | -6.90         | 4ipz | -6.30         |
| 4ejk     | -7.30         | 3sug | -6.90         | 4ipz | -6.30         |
| 4ejk     | -7.30         | 3m5i | -6.90         | 4ipz | -6.30         |
| 4dmn     | -7.30         | 2wfo | -6.90         | 4ipz | -6.30         |
| 4dmn     | -7.30         | 2vxw | -6.90         | 4ipz | -6.30         |
| 4dgb     | -7.30         | 2q5u | -6.90         | 4ipz | -6.30         |
| 4dgb     | -7.30         | 2q5u | -6.90         | 4ipz | -6.30         |
| 3sv7     | -7.30         | 2q5u | -6.90         | 4ipz | -6.30         |
| 3sue     | -7.30         | 2q5u | -6.90         | 4ipz | -6.30         |
| 3su5     | -7.30         | 2q5u | -6.90         | 4ipz | -6.30         |
| 3sis     | -7.30         | 2q5u | -6.90         | 4c1w | -6.30         |
| 3m5h     | -7.30         | 2m3m | -6.90         | 4mod | -6.20         |
| 3ifu     | -7.30         | 2hfz | -6.90         | 4mod | -6.20         |
| 3gsn     | -7.30         | 2g69 | -6.90         | 4ipz | -6.20         |
| 3avk     | -7.30         | 2g69 | -6.90         | 4epj | -6.20         |
| 2zu1     | -7.30         | 1zsd | -6.90         | 4epj | -6.10         |
| 2yhf     | -7.30         | 1qr9 | -6.90         | 2c86 | -6.10         |
| Papain   | -7.20         | 3sug | -6.80         | 2c3a | -6.10         |
| protease | -7.20         | 3su6 | -6.80         | 4ejr | -6.00         |
| 4lsp     | -7.20         | 3s12 | -6.80         | 3vie | -6.00         |
| 4g9d     | -7.20         | 3avj | -6.80         | 4adq | -5.90         |
| 4g8i     | -7.20         | 2q7c | -6.80         | 2mkr | -5.90         |
| 4ekx     | -7.20         | 2q7c | -6.80         | 3kqk | -5.80         |
| 3vie     | -7.20         | 2q7c | -6.80         | 3giv | -5.80         |
| 2xze     | -7.20         | 2m3l | -6.80         | 4adq | -5.70         |
| 1z8r     | -7.20         | 2gvf | -6.80         | 2vxj | -5.70         |
| 1f08     | -7.20         | 4nwk | -6.70         | 3vtt | -5.50         |
| 4g1g     | -7.10         | 3zd0 | -6.70         | 4kol | -5.40         |
| 4ejk     | -7.10         | 3b71 | -6.70         | 3i6k | -5.40         |
| 3sv9     | -7.10         | 3b71 | -6.70         | 4kom | -5.30         |
| 3su5     | -7.10         | 3avc | -6.70         | 4g2k | -5.20         |
| 3sis     | -7.10         | 2zu3 | -6.70         | 3vtt | -5.20         |



| PDB  | Docking score | PDB  | Docking score | PDB  | Docking score |
|------|---------------|------|---------------|------|---------------|
| 4ep2 | -5.10         | 4uoa | -4.60         | 3m5g | -2.50         |
| 2x9m | -5.10         | 4g2k | -4.50         | 4dge | -1.50         |
| 4ep2 | -5.00         | 1hhg | -4.30         | 3vu5 | -1.30         |
| 4kon | -4.90         | 2jw8 | -3.90         | 2zsv | -1.10         |
| 2me3 | -4.90         | 4lki | -3.70         | 2zsv | -1.00         |
| 2l3h | -4.90         | 1knz | -3.20         | 4e0r | -0.50         |
| 3j22 | -4.80         | 4qhm | -2.90         | 3m5j | -0.40         |
| 3j23 | -4.70         | 2wrb | -2.70         | 4fqm | -0.10         |

**Table S3.** Predicted docking score of Dutarestide against the viral protein panel.

| PDB  | Docking score | PDB  | Docking score | PDB  | Docking score |
|------|---------------|------|---------------|------|---------------|
| 4wm7 | -12.80        | 4uo5 | -11.60        | 3rwe | -11.30        |
| 3t3c | -12.60        | 4j4w | -11.60        | 3rwc | -11.30        |
| 3t3c | -12.50        | 3vcl | -11.60        | 3rwc | -11.30        |
| 3nxu | -12.50        | 3vcl | -11.60        | 3lkh | -11.30        |
| 2i4x | -12.40        | 3bw9 | -11.60        | 3kqn | -11.30        |
| 4j4x | -12.30        | 2wrg | -11.60        | 3kqn | -11.30        |
| 2i4v | -12.30        | 2wrg | -11.60        | 3kqn | -11.30        |
| 4rw6 | -12.20        | 1p9u | -11.60        | 3kql | -11.30        |
| 3r4b | -12.20        | 1ida | -11.60        | 3kql | -11.30        |
| 2i4d | -12.10        | 4uo5 | -11.50        | 3koa | -11.30        |
| 4wm8 | -12.00        | 4uo5 | -11.50        | 3i6l | -11.30        |
| 3bwa | -12.00        | 4rw7 | -11.50        | 3gso | -11.30        |
| 3b0w | -12.00        | 4qru | -11.50        | 2hcs | -11.30        |
| 2axg | -12.00        | 4qru | -11.50        | 2bvp | -11.30        |
| 4q6r | -11.90        | 4qrs | -11.50        | 1hhk | -11.30        |
| 4q6r | -11.90        | 4m30 | -11.50        | 4uo0 | -11.20        |
| 4k7f | -11.90        | 4g9f | -11.50        | 4uo0 | -11.20        |
| 4k7f | -11.90        | 4cew | -11.50        | 4m8y | -11.20        |
| 3r4b | -11.90        | 4lsv | -11.40        | 4j4v | -11.20        |
| 1oop | -11.90        | 3rwg | -11.40        | 4e78 | -11.20        |
| 1hhh | -11.90        | 3rwg | -11.40        | 3rwe | -11.20        |
| 4rw4 | -11.80        | 3kql | -11.40        | 3ok9 | -11.20        |
| 4rw4 | -11.80        | 3bew | -11.40        | 3lkh | -11.20        |
| 4o44 | -11.80        | 1idb | -11.40        | 3gso | -11.20        |
| 4g42 | -11.80        | 1hhj | -11.40        | 4uo2 | -11.10        |
| 3u7s | -11.80        | 4m8y | -11.30        | 4uo2 | -11.10        |
| 3u7s | -11.80        | 4j4v | -11.30        | 4uo2 | -11.10        |
| 2i4w | -11.80        | 4j4v | -11.30        | 4uo2 | -11.10        |
| 3rwd | -11.70        | 4j4v | -11.30        | 4uo0 | -11.10        |
| 3ggg | -11.70        | 4j4v | -11.30        | 4uo0 | -11.10        |
| 3bw9 | -11.70        | 3ztj | -11.30        | 4uo0 | -11.10        |
| 2wrg | -11.70        | 3vbr | -11.30        | 4uo0 | -11.10        |
| 2wrg | -11.70        | 3rwi | -11.30        | 4uo0 | -11.10        |
| 2wrg | -11.70        | 3rwh | -11.30        | 4uo0 | -11.10        |
| 2i4u | -11.70        | 3rwh | -11.30        | 4j4y | -11.10        |

| PDB  | Docking score | PDB  | Docking score | PDB  | Docking score |
|------|---------------|------|---------------|------|---------------|
| 4gua | -11.10        | 4unx | -10.90        | 4ejl | -10.70        |
| 4fqj | -11.10        | 4unw | -10.90        | 4e5e | -10.70        |
| 3h98 | -11.10        | 4unw | -10.90        | 3hkw | -10.70        |
| 3h98 | -11.10        | 4opa | -10.90        | 3hkw | -10.70        |
| 2hjk | -11.10        | 4mkb | -10.90        | 3gsw | -10.70        |
| 2bvo | -11.10        | 4fnk | -10.90        | 3fku | -10.70        |
| 1hhi | -11.10        | 3vbo | -10.90        | 3cj3 | -10.70        |
| 4uo7 | -11.00        | 3tie | -10.90        | 3cj3 | -10.70        |
| 4uo7 | -11.00        | 3tie | -10.90        | 3cj0 | -10.70        |
| 4uo7 | -11.00        | 3s11 | -10.90        | 3cj0 | -10.70        |
| 4uo7 | -11.00        | 3ciz | -10.90        | 2ygc | -10.70        |
| 4uo7 | -11.00        | 3ciz | -10.90        | 2ygc | -10.70        |
| 4uo7 | -11.00        | 2wrh | -10.90        | 1syv | -10.70        |
| 4uo3 | -11.00        | 2wre | -10.90        | 4rw9 | -10.60        |
| 4uo3 | -11.00        | 2wr1 | -10.90        | 4pg2 | -10.60        |
| 4uo3 | -11.00        | 2uv0 | -10.90        | 4o4g | -10.60        |
| 4uo3 | -11.00        | 2uv0 | -10.90        | 4mka | -10.60        |
| 4uo3 | -11.00        | 2uv0 | -10.90        | 4mka | -10.60        |
| 4uo2 | -11.00        | 2uv0 | -10.90        | 4mk8 | -10.60        |
| 4uo2 | -11.00        | 2uv0 | -10.90        | 4mk8 | -10.60        |
| 4uo0 | -11.00        | 2gec | -10.90        | 4ejl | -10.60        |
| 4uo0 | -11.00        | 1r6a | -10.90        | 4bac | -10.60        |
| 4uo0 | -11.00        | 1n59 | -10.90        | 3cj4 | -10.60        |
| 4uo0 | -11.00        | 1izh | -10.90        | 3cj2 | -10.60        |
| 4uo0 | -11.00        | 4uo0 | -10.80        | 3bwa | -10.60        |
| 4uo0 | -11.00        | 4mkb | -10.80        | 2uv0 | -10.60        |
| 4qrs | -11.00        | 4i2q | -10.80        | 4pv9 | -10.50        |
| 4m8x | -11.00        | 3kqh | -10.80        | 4mmr | -10.50        |
| 4m8x | -11.00        | 2wre | -10.80        | 4mk9 | -10.50        |
| 4cey | -11.00        | 2wre | -10.80        | 4j4u | -10.50        |
| 3kna | -11.00        | 2wre | -10.80        | 4e7a | -10.50        |
| 3gsr | -11.00        | 2wre | -10.80        | 4e7a | -10.50        |
| 3gsq | -11.00        | 2wre | -10.80        | 4a92 | -10.50        |
| 3gsq | -11.00        | 2wr3 | -10.80        | 3cj5 | -10.50        |
| 3ggu | -11.00        | 2wr0 | -10.80        | 3cj4 | -10.50        |
| 3bev | -11.00        | 2wa1 | -10.80        | 3cj2 | -10.50        |
| 2wr1 | -11.00        | 2vvw | -10.80        | 2ygb | -10.50        |
| 2wr1 | -11.00        | 2uv0 | -10.80        | 2ygb | -10.50        |
| 2wr0 | -11.00        | 2uv0 | -10.80        | 4fnk | -10.40        |
| 2wr0 | -11.00        | 2uv0 | -10.80        | 4e5l | -10.40        |
| 2wr0 | -11.00        | 2uv0 | -10.80        | 4e5f | -10.40        |
| 2wr0 | -11.00        | 2uv0 | -10.80        | 3nf7 | -10.40        |
| 2vvw | -11.00        | 4unx | -10.70        | 3n0i | -10.40        |
| 1izi | -11.00        | 4unx | -10.70        | 3h2l | -10.40        |
| 4uo0 | -10.90        | 4unw | -10.70        | 3h2l | -10.40        |
| 4uo0 | -10.90        | 4rw8 | -10.70        | 3cpl | -10.40        |
| 4uo0 | -10.90        | 4mk9 | -10.70        | 3cj5 | -10.40        |
| 4unx | -10.90        | 4j4r | -10.70        | 2wrf | -10.40        |

| PDB  | Docking score | PDB  | Docking score | PDB  | Docking score |
|------|---------------|------|---------------|------|---------------|
| 2wr4 | -10.40        | 3tid | -10.00        | 2oy0 | -9.70         |
| 2wr2 | -10.40        | 3nf9 | -10.00        | 1sk7 | -9.70         |
| 2wr2 | -10.40        | 3nf8 | -10.00        | 4uny | -9.60         |
| 2wr2 | -10.40        | 3nf8 | -10.00        | 4lsu | -9.60         |
| 1quv | -10.40        | 3klv | -10.00        | 4j4s | -9.60         |
| 4g43 | -10.30        | 3ebj | -10.00        | 4j4s | -9.60         |
| 4e5g | -10.30        | 3d0g | -10.00        | 4cdx | -9.60         |
| 4cqy | -10.30        | 3avh | -10.00        | 3se9 | -9.60         |
| 4bh0 | -10.30        | 2vxx | -10.00        | 3nf6 | -9.60         |
| 4a92 | -10.30        | 2vxx | -10.00        | 2x83 | -9.60         |
| 3nf7 | -10.30        | 2hty | -10.00        | 2x83 | -9.60         |
| 3hky | -10.30        | 1a41 | -10.00        | 1r6a | -9.60         |
| 3hky | -10.30        | 4uo3 | -9.90         | 4uo6 | -9.50         |
| 3gsw | -10.30        | 4mj1 | -9.90         | 4mmu | -9.50         |
| 3cpl | -10.30        | 4i2p | -9.90         | 4fqr | -9.50         |
| 1pk0 | -10.30        | 4gag | -9.90         | 4ffz | -9.50         |
| 4mgu | -10.20        | 4ej8 | -9.90         | 4egt | -9.50         |
| 4lst | -10.20        | 4cdu | -9.90         | 4e91 | -9.50         |
| 4f3z | -10.20        | 3nf9 | -9.90         | 3uf5 | -9.50         |
| 4e78 | -10.20        | 3avg | -9.90         | 3ava | -9.50         |
| 3tid | -10.20        | 4pv9 | -9.80         | 4g8g | -9.40         |
| 3nf7 | -10.20        | 4pv9 | -9.80         | 4fqy | -9.40         |
| 3nf7 | -10.20        | 4mds | -9.80         | 4fqy | -9.40         |
| 3n0i | -10.20        | 4mds | -9.80         | 4fqr | -9.40         |
| 2wr7 | -10.20        | 4lsu | -9.80         | 4cqy | -9.40         |
| 2hu0 | -10.20        | 4kpp | -9.80         | 4bh2 | -9.40         |
| 2gec | -10.20        | 4i2p | -9.80         | 4bh2 | -9.40         |
| 1n5a | -10.20        | 4gaj | -9.80         | 3se8 | -9.40         |
| 4u6h | -10.10        | 4ej8 | -9.80         | 3se8 | -9.40         |
| 4qhk | -10.10        | 4adf | -9.80         | 3nfa | -9.40         |
| 4mk7 | -10.10        | 4adf | -9.80         | 3d23 | -9.40         |
| 4lsr | -10.10        | 4adf | -9.80         | 3ava | -9.40         |
| 4cdq | -10.10        | 3iyw | -9.80         | 1v3e | -9.40         |
| 3nf8 | -10.10        | 3iyw | -9.80         | 1v2i | -9.40         |
| 3hkw | -10.10        | 3iyw | -9.80         | 1v2i | -9.40         |
| 2uv0 | -10.10        | 3iyw | -9.80         | 4pv8 | -9.30         |
| 1klm | -10.10        | 3iyw | -9.80         | 4kps | -9.30         |
| 4uo3 | -10.00        | 3d0h | -9.80         | 4g8g | -9.30         |
| 4uo3 | -10.00        | 2xi5 | -9.80         | 4dag | -9.30         |
| 4uo3 | -10.00        | 4jo8 | -9.70         | 4co6 | -9.30         |
| 4uo3 | -10.00        | 4gag | -9.70         | 3zp1 | -9.30         |
| 4qhn | -10.00        | 4cqy | -9.70         | 3oah | -9.30         |
| 4mk7 | -10.00        | 4bgz | -9.70         | 3nfa | -9.30         |
| 4mj0 | -10.00        | 4adf | -9.70         | 3nfa | -9.30         |
| 4g9f | -10.00        | 3nf6 | -9.70         | 3nfa | -9.30         |
| 4cdw | -10.00        | 3lqa | -9.70         | 3nf6 | -9.30         |
| 4adf | -10.00        | 3iyw | -9.70         | 3mlh | -9.30         |
| 4adf | -10.00        | 2xwy | -9.70         | 3i6g | -9.30         |

| PDB  | Docking score | PDB  | Docking score | PDB  | Docking score |
|------|---------------|------|---------------|------|---------------|
| 3d23 | -9.30         | 3avb | -9.00         | 3avb | -8.80         |
| 2z35 | -9.30         | 3ava | -9.00         | 2mgu | -8.80         |
| 2ghw | -9.30         | 2xi5 | -9.00         | 1v3b | -8.80         |
| 1v3c | -9.30         | 5ajm | -8.90         | 5ajm | -8.70         |
| 1v3c | -9.30         | 5ajm | -8.90         | 4uo8 | -8.70         |
| 1v3c | -9.30         | 4uo6 | -8.90         | 4mg3 | -8.70         |
| 1v3b | -9.30         | 4qhl | -8.90         | 4iv1 | -8.70         |
| 4jb9 | -9.20         | 4pv8 | -8.90         | 4fqi | -8.70         |
| 4bgy | -9.20         | 4mj1 | -8.90         | 4fqi | -8.70         |
| 4bgw | -9.20         | 4g9z | -8.90         | 4cqp | -8.70         |
| 4bgw | -9.20         | 4fqi | -8.90         | 4cqp | -8.70         |
| 3v3m | -9.20         | 4cqu | -8.90         | 4cqp | -8.70         |
| 3nf9 | -9.20         | 4cqu | -8.90         | 4cqp | -8.70         |
| 3ku3 | -9.20         | 4cqu | -8.90         | 3zpa | -8.70         |
| 3ku3 | -9.20         | 4cqr | -8.90         | 3zp6 | -8.70         |
| 1b53 | -9.20         | 4cqr | -8.90         | 3zp0 | -8.70         |
| 4gaj | -9.10         | 4cqq | -8.90         | 3rwj | -8.70         |
| 4fp8 | -9.10         | 4cqq | -8.90         | 3oah | -8.70         |
| 4fp8 | -9.10         | 4cqq | -8.90         | 3nf6 | -8.70         |
| 4cqz | -9.10         | 3zp2 | -8.90         | 3mj5 | -8.70         |
| 4cqz | -9.10         | 3ro5 | -8.90         | 3mj5 | -8.70         |
| 4bh1 | -9.10         | 3nw8 | -8.90         | 3avg | -8.70         |
| 4bh1 | -9.10         | 3gsv | -8.90         | 2oy0 | -8.70         |
| 3zpb | -9.10         | 3bwa | -8.90         | 2c36 | -8.70         |
| 3zpb | -9.10         | 3avb | -8.90         | 2c36 | -8.70         |
| 3zp3 | -9.10         | 2ht5 | -8.90         | 4ejd | -8.60         |
| 3v3m | -9.10         | 1v3d | -8.90         | 4cqp | -8.60         |
| 3rki | -9.10         | 1v3d | -8.90         | 4bgx | -8.60         |
| 3o4l | -9.10         | 1rzj | -8.90         | 3ku5 | -8.60         |
| 3nf9 | -9.10         | 5ajm | -8.80         | 3ku5 | -8.60         |
| 3ava | -9.10         | 5ajm | -8.80         | 3gsx | -8.60         |
| 3alz | -9.10         | 5ajm | -8.80         | 3gsr | -8.60         |
| 2wrc | -9.10         | 4mg3 | -8.80         | 2xra | -8.60         |
| 1v3e | -9.10         | 4g9z | -8.80         | 2vvy | -8.60         |
| 1v3c | -9.10         | 4cr0 | -8.80         | 2hu4 | -8.60         |
| 1rzk | -9.10         | 4cqu | -8.80         | 2hu4 | -8.60         |
| 4i7f | -9.00         | 4cqu | -8.80         | 2htw | -8.60         |
| 4e76 | -9.00         | 4cqu | -8.80         | 2htu | -8.60         |
| 4cqs | -9.00         | 4cqp | -8.80         | 2ge8 | -8.60         |
| 4cqs | -9.00         | 4bh1 | -8.80         | 1yh3 | -8.60         |
| 4bgx | -9.00         | 3vbh | -8.80         | 4mza | -8.50         |
| 3nwf | -9.00         | 3sdy | -8.80         | 4mza | -8.50         |
| 3nf8 | -9.00         | 3sdy | -8.80         | 4f3i | -8.50         |
| 3ku6 | -9.00         | 3s13 | -8.80         | 4f3i | -8.50         |
| 3ku6 | -9.00         | 3rwj | -8.80         | 4eq0 | -8.50         |
| 3gsv | -9.00         | 3gsx | -8.80         | 4ejd | -8.50         |
| 3avl | -9.00         | 3gsu | -8.80         | 4ejd | -8.50         |
| 3avb | -9.00         | 3avl | -8.80         | 4dkq | -8.50         |

| PDB             | Docking score | PDB  | Docking score | PDB  | Docking score |
|-----------------|---------------|------|---------------|------|---------------|
| 4cqy            | -8.50         | 4i2q | -8.10         | 2q7c | -7.80         |
| 4bh4            | -8.50         | 4fb3 | -8.10         | 2bvq | -7.80         |
| 3u82            | -8.50         | 4e5j | -8.10         | 2axf | -7.80         |
| 3pqy            | -8.50         | 4bh3 | -8.10         | 1sys | -7.80         |
| 3gsu            | -8.50         | 4bh3 | -8.10         | 4nwk | -7.70         |
| 3avn            | -8.50         | 4bh3 | -8.10         | 4i31 | -7.70         |
| 3avj            | -8.50         | 4bh3 | -8.10         | 4i31 | -7.70         |
| 3avc            | -8.50         | 3alw | -8.10         | 4fvu | -7.70         |
| 2zu5            | -8.50         | 2iph | -8.10         | 3sv9 | -7.70         |
| 2zu4            | -8.50         | 2iph | -8.10         | 3sit | -7.70         |
| 2wh6            | -8.50         | 2iph | -8.10         | 3sit | -7.70         |
| 2hu4            | -8.50         | 2iph | -8.10         | 2zu1 | -7.70         |
| 2hu4            | -8.50         | 2hfz | -8.10         | 4qrt | -7.60         |
| Main protease   | -8.40         | 1rpi | -8.10         | 4mmt | -7.60         |
| 4qrt            | -8.40         | 4qru | -8.00         | 4ejd | -7.60         |
| 4lkj            | -8.40         | 4mze | -8.00         | 4ejd | -7.60         |
| 4hkj            | -8.40         | 4gzf | -8.00         | 4ejd | -7.60         |
| 4bh4            | -8.40         | 4gve | -8.00         | 4dgd | -7.60         |
| 4bh4            | -8.40         | 4fqv | -8.00         | 4dgc | -7.60         |
| 3u82            | -8.40         | 4ep3 | -8.00         | 4bh4 | -7.60         |
| 3alx            | -8.40         | 4e92 | -8.00         | 3sv9 | -7.60         |
| 2ge7            | -8.40         | 3rwf | -8.00         | 3sit | -7.60         |
| 1rv7            | -8.40         | 2xze | -8.00         | 3sit | -7.60         |
| 1rpi            | -8.40         | 1rq9 | -8.00         | 3m5h | -7.60         |
| 4gv3            | -8.30         | 4qrt | -7.90         | 3gsn | -7.60         |
| 3ztn            | -8.30         | 4oph | -7.90         | 3avf | -7.60         |
| 3sdy            | -8.30         | 4mmv | -7.90         | 2zty | -7.60         |
| 3rwi            | -8.30         | 4jkg | -7.90         | 2q7c | -7.60         |
| 3nwa            | -8.30         | 4i32 | -7.90         | 2lsp | -7.60         |
| 3nwa            | -8.30         | 4gzf | -7.90         | 2g69 | -7.60         |
| 2xze            | -8.30         | 4fqv | -7.90         | 2g69 | -7.60         |
| 2ghv            | -8.30         | 4ejk | -7.90         | 2axf | -7.60         |
| 4lsp            | -8.20         | 4ejk | -7.90         | 4ipz | -7.50         |
| 4gv3            | -8.20         | 2xya | -7.90         | 4eq0 | -7.50         |
| 4dgd            | -8.20         | 2hcn | -7.90         | 4dco | -7.50         |
| 4dga            | -8.20         | 4mj0 | -7.80         | 4dgc | -7.50         |
| 4dga            | -8.20         | 4jkg | -7.80         | 4dgc | -7.50         |
| 3avh            | -8.20         | 4ep3 | -7.80         | 4dgc | -7.50         |
| 2c7u            | -8.20         | 4ejd | -7.80         | 4dgc | -7.50         |
| 1p9s            | -8.20         | 4eee | -7.80         | 4dgc | -7.50         |
| Spike RBD       | -8.10         | 4e5i | -7.80         | 3sv6 | -7.50         |
| Papain protease | -8.10         | 3vbf | -7.80         | 3sud | -7.50         |
| 4mms            | -8.10         | 3vbf | -7.80         | 3gsw | -7.50         |
| 4lss            | -8.10         | 3sis | -7.80         | 3avk | -7.50         |
| 4j6r            | -8.10         | 3sis | -7.80         | 2ca1 | -7.50         |
| 4iv3            | -8.10         | 3rwf | -7.80         | 4jpi | -7.40         |
|                 |               | 2wh6 | -7.80         | 4ipz | -7.40         |
|                 |               | 2q7c | -7.80         | 4ipz | -7.40         |

| PDB  | Docking score | PDB  | Docking score | PDB  | Docking score |
|------|---------------|------|---------------|------|---------------|
| 4ipz | -7.40         | 4nwk | -7.00         | 3kmq | -6.40         |
| 4ffv | -7.40         | 3uqi | -7.00         | 2v6q | -6.40         |
| 4ejd | -7.40         | 3uqi | -7.00         | 2q7c | -6.40         |
| 3u83 | -7.40         | 3su3 | -7.00         | 4mod | -6.30         |
| 3su3 | -7.40         | 3su2 | -7.00         | 4mod | -6.30         |
| 3kms | -7.40         | 3su0 | -7.00         | 4epj | -6.30         |
| 4oyd | -7.30         | 3su0 | -7.00         | 4ekx | -6.30         |
| 4ipz | -7.30         | 3s12 | -7.00         | 3sv7 | -6.30         |
| 4ipz | -7.30         | 3d0i | -7.00         | 3sug | -6.30         |
| 4ipz | -7.30         | 2yka | -7.00         | 3sug | -6.30         |
| 4ipz | -7.30         | 1b50 | -7.00         | 2q5u | -6.30         |
| 4ipz | -7.30         | 4gye | -6.90         | 2q5u | -6.30         |
| 4g9d | -7.30         | 4gye | -6.90         | 2q5u | -6.30         |
| 4dkp | -7.30         | 4eqj | -6.90         | 2q5u | -6.30         |
| 4dgb | -7.30         | 4ejd | -6.90         | 1zsd | -6.30         |
| 3w39 | -7.30         | 3sv6 | -6.90         | 4nwl | -6.20         |
| 3u83 | -7.30         | 3su6 | -6.90         | 4i33 | -6.20         |
| 3su6 | -7.30         | 3sit | -6.90         | 3suf | -6.20         |
| 3su2 | -7.30         | 4oyd | -6.80         | 3rkc | -6.20         |
| 3su1 | -7.30         | 4b8e | -6.80         | 3avc | -6.20         |
| 3sit | -7.30         | 3vie | -6.80         | 2q5u | -6.20         |
| 3m5i | -7.30         | 3su4 | -6.80         | 2q5u | -6.20         |
| 3ifu | -7.30         | 3su4 | -6.80         | 2me2 | -6.20         |
| 3gzf | -7.30         | 2me4 | -6.80         | 2m3l | -6.20         |
| 2xpx | -7.30         | 4gv9 | -6.70         | 3zd0 | -6.10         |
| 4ipz | -7.20         | 4dgb | -6.70         | 2zu3 | -6.10         |
| 4e92 | -7.20         | 4b8e | -6.70         | 1z8r | -6.10         |
| 4dmn | -7.20         | 2yol | -6.70         | 1qr9 | -6.10         |
| 3p8n | -7.20         | 2yol | -6.70         | 4g8i | -6.00         |
| 2xpx | -7.20         | 2yhf | -6.70         | 3avj | -6.00         |
| 2vxw | -7.20         | 4g9d | -6.60         | 4b4n | -5.90         |
| 2gvf | -7.20         | 3sud | -6.60         | 2l2f | -5.90         |
| 4mze | -7.10         | 3su5 | -6.60         | 2c86 | -5.90         |
| 4jpk | -7.10         | 3su5 | -6.60         | 2c3a | -5.90         |
| 4ipz | -7.10         | 3b71 | -6.60         | 4adq | -5.80         |
| 4dmn | -7.10         | 3b71 | -6.60         | 3avk | -5.80         |
| 4dkr | -7.10         | 3a07 | -6.60         | 4b4n | -5.70         |
| 4c1w | -7.10         | 2wfo | -6.60         | 4g8i | -5.60         |
| 4b8e | -7.10         | 2q7c | -6.60         | 4adq | -5.60         |
| 3sv8 | -7.10         | 2q7c | -6.60         | 3avn | -5.60         |
| 3sv7 | -7.10         | 4ipz | -6.50         | 3sue | -5.40         |
| 3su2 | -7.10         | 4ejk | -6.50         | 3giv | -5.40         |
| 3su1 | -7.10         | 4c1w | -6.50         | 3kqk | -5.30         |
| 3p8o | -7.10         | 3su5 | -6.50         | 2vxj | -5.30         |
| 2ztz | -7.10         | 2yhh | -6.50         | 3iyp | -5.20         |
| 2zol | -7.10         | 2y1s | -6.50         | 2x9m | -5.20         |
| 1qz8 | -7.10         | 2wfo | -6.50         | 2x5i | -5.20         |
| 1f08 | -7.10         | 4ejr | -6.40         | 3i6k | -5.10         |

| PDB  | Docking score | PDB  | Docking score | PDB  | Docking score |
|------|---------------|------|---------------|------|---------------|
| 4uo4 | -5.00         | 2m3m | -4.30         | 2zsv | -1.30         |
| 3vtt | -5.00         | 2me3 | -4.20         | 2zsv | -1.10         |
| 3vtt | -5.00         | 4ep2 | -3.70         | 4uoa | -0.60         |
| 2mkr | -5.00         | 4ep2 | -3.70         | 4e0r | -0.50         |
| 1qr8 | -4.90         | 4qhm | -3.00         | 3m5g | -0.40         |
| 3j23 | -4.70         | 4epj | -3.00         | 4fqm | -0.30         |
| 3vie | -4.60         | 2l3h | -2.60         |      |               |
| 3j22 | -4.40         | 4dge | -1.80         |      |               |

**Table S 4.** Predicted docking score of Dolutegravir against the viral protein panel.

| PDB  | Docking score | PDB  | Docking score | PDB  | Docking score |
|------|---------------|------|---------------|------|---------------|
| 4cey | -11.30        | 2uv0 | -10.60        | 2i4w | -10.30        |
| 3koa | -11.30        | 2uv0 | -10.60        | 2i4u | -10.30        |
| 4g42 | -11.10        | 2uv0 | -10.60        | 2hty | -10.30        |
| 4cdu | -11.10        | 2uv0 | -10.60        | 1syv | -10.30        |
| 3t3c | -11.10        | 2uv0 | -10.60        | 4uo3 | -10.20        |
| 3t3c | -11.10        | 2htw | -10.60        | 4mkb | -10.20        |
| 4j4x | -11.00        | 4wm7 | -10.50        | 4mk7 | -10.20        |
| 4fvu | -11.00        | 4pv9 | -10.50        | 4lkj | -10.20        |
| 3kql | -11.00        | 4fnk | -10.50        | 4k7f | -10.20        |
| 3kql | -11.00        | 4f3z | -10.50        | 4k7f | -10.20        |
| 4wm8 | -10.90        | 3vcl | -10.50        | 4fqr | -10.20        |
| 4lsv | -10.90        | 3kna | -10.50        | 4fqr | -10.20        |
| 4cdq | -10.90        | 3fku | -10.50        | 4e76 | -10.20        |
| 3kql | -10.90        | 3b0w | -10.50        | 3r4b | -10.20        |
| 4cew | -10.80        | 2i4v | -10.50        | 3pqy | -10.20        |
| 1klm | -10.80        | 4g43 | -10.40        | 3lkh | -10.20        |
| 4g9z | -10.70        | 3u7s | -10.40        | 3lkh | -10.20        |
| 4g9z | -10.70        | 3u7s | -10.40        | 3i6l | -10.20        |
| 4cdx | -10.70        | 3rwd | -10.40        | 3cj5 | -10.20        |
| 3nxu | -10.70        | 3kqn | -10.40        | 3bwa | -10.20        |
| 2uv0 | -10.70        | 3kqn | -10.40        | 3bwa | -10.20        |
| 2uv0 | -10.70        | 3kqn | -10.40        | 3bw9 | -10.20        |
| 2uv0 | -10.70        | 3hkw | -10.40        | 2wrf | -10.20        |
| 2uv0 | -10.70        | 3cj3 | -10.40        | 2hu0 | -10.20        |
| 2uv0 | -10.70        | 2wrh | -10.40        | 2hjk | -10.20        |
| 4cdw | -10.60        | 2bvp | -10.40        | 2gec | -10.20        |
| 3vcl | -10.60        | 1hhk | -10.40        | 2gec | -10.20        |
| 2wrg | -10.60        | 4e78 | -10.30        | 2axg | -10.20        |
| 2wrg | -10.60        | 4e78 | -10.30        | 4uo3 | -10.10        |
| 2wrg | -10.60        | 3ztj | -10.30        | 4mka | -10.10        |
| 2wrg | -10.60        | 3s11 | -10.30        | 4gua | -10.10        |
| 2wrg | -10.60        | 3rwc | -10.30        | 4fnk | -10.10        |
| 2uv0 | -10.60        | 3rwc | -10.30        | 3r4b | -10.10        |
| 2uv0 | -10.60        | 3cj3 | -10.30        | 3o4l | -10.10        |

| PDB  | Docking score | PDB  | Docking score | PDB  | Docking score |
|------|---------------|------|---------------|------|---------------|
| 3cj5 | -10.10        | 4uo2 | -9.90         | 2wr0 | -9.90         |
| 3bew | -10.10        | 4uo0 | -9.90         | 2hu4 | -9.90         |
| 3bev | -10.10        | 4uo0 | -9.90         | 2hu4 | -9.90         |
| 2wre | -10.10        | 4uo0 | -9.90         | 2hu4 | -9.90         |
| 2i4x | -10.10        | 4uo0 | -9.90         | 1oop | -9.90         |
| 2hcs | -10.10        | 4uo0 | -9.90         | 1ida | -9.90         |
| 2bvo | -10.10        | 4uo0 | -9.90         | 4uo7 | -9.80         |
| 1r6a | -10.10        | 4uo0 | -9.90         | 4uo7 | -9.80         |
| 1p9u | -10.10        | 4uo0 | -9.90         | 4uo7 | -9.80         |
| 1hhj | -10.10        | 4uo0 | -9.90         | 4uo7 | -9.80         |
| 1hhi | -10.10        | 4uo0 | -9.90         | 4uo7 | -9.80         |
| 1hhh | -10.10        | 4uo0 | -9.90         | 4uo7 | -9.80         |
| 4unw | -10.00        | 4uo0 | -9.90         | 4uo2 | -9.80         |
| 4unw | -10.00        | 4uo0 | -9.90         | 4uo0 | -9.80         |
| 4u6h | -10.00        | 4uo0 | -9.90         | 4unw | -9.80         |
| 4rw4 | -10.00        | 4uo0 | -9.90         | 4rw6 | -9.80         |
| 4qru | -10.00        | 4uo0 | -9.90         | 4qrs | -9.80         |
| 4qru | -10.00        | 4uo0 | -9.90         | 4qrs | -9.80         |
| 4q6r | -10.00        | 4rw4 | -9.90         | 4j4y | -9.80         |
| 4o44 | -10.00        | 4q6r | -9.90         | 4i2p | -9.80         |
| 4o4g | -10.00        | 4mmr | -9.90         | 4ejl | -9.80         |
| 4j4u | -10.00        | 4mk9 | -9.90         | 4e5i | -9.80         |
| 4ej8 | -10.00        | 4mk8 | -9.90         | 3vbr | -9.80         |
| 3rwi | -10.00        | 4g9f | -9.90         | 3iyw | -9.80         |
| 3rwh | -10.00        | 4ej8 | -9.90         | 3iyw | -9.80         |
| 3rwh | -10.00        | 3se9 | -9.90         | 3hky | -9.80         |
| 3rwg | -10.00        | 3rwg | -9.90         | 3h98 | -9.80         |
| 3ok9 | -10.00        | 3rwe | -9.90         | 3gsw | -9.80         |
| 3klv | -10.00        | 3rwe | -9.90         | 3cj2 | -9.80         |
| 3hky | -10.00        | 3iyw | -9.90         | 3ciz | -9.80         |
| 3hkw | -10.00        | 3iyw | -9.90         | 2wr2 | -9.80         |
| 3ciz | -10.00        | 3iyw | -9.90         | 2wr1 | -9.80         |
| 3bw9 | -10.00        | 3hkw | -9.90         | 2wr1 | -9.80         |
| 2ygc | -10.00        | 3h2l | -9.90         | 1v3d | -9.80         |
| 2ygc | -10.00        | 3h2l | -9.90         | 1v3d | -9.80         |
| 2wrc | -10.00        | 3ggg | -9.90         | 1izi | -9.80         |
| 2i4d | -10.00        | 3ggg | -9.90         | 4uo8 | -9.70         |
| 1idb | -10.00        | 2wre | -9.90         | 4pg2 | -9.70         |
| 4uo5 | -9.90         | 2wre | -9.90         | 4j4w | -9.70         |
| 4uo5 | -9.90         | 2wre | -9.90         | 4j4s | -9.70         |
| 4uo5 | -9.90         | 2wre | -9.90         | 4g9f | -9.70         |
| 4uo3 | -9.90         | 2wre | -9.90         | 4ejl | -9.70         |
| 4uo3 | -9.90         | 2wr3 | -9.90         | 4e7a | -9.70         |
| 4uo3 | -9.90         | 2wr1 | -9.90         | 4e7a | -9.70         |
| 4uo2 | -9.90         | 2wr0 | -9.90         | 4e5e | -9.70         |
| 4uo2 | -9.90         | 2wr0 | -9.90         | 4cqW | -9.70         |
| 4uo2 | -9.90         | 2wr0 | -9.90         | 4cqV | -9.70         |
| 4uo2 | -9.90         | 2wr0 | -9.90         | 4cqu | -9.70         |



| PDB  | Docking score | PDB      | Docking score | PDB  | Docking score |
|------|---------------|----------|---------------|------|---------------|
| 4cqr | -9.70         | 3nf8     | -9.50         | 4e5l | -9.30         |
| 4bh2 | -9.70         | 3nf8     | -9.50         | 4dag | -9.30         |
| 3h98 | -9.70         | 3nf6     | -9.50         | 4cqu | -9.30         |
| 3gsw | -9.70         | 3nf6     | -9.50         | 4bh0 | -9.30         |
| 3gsr | -9.70         | 3mlh     | -9.50         | 3vbo | -9.30         |
| 3gso | -9.70         | 3iyw     | -9.50         | 3tie | -9.30         |
| 3ebj | -9.70         | 2ygb     | -9.50         | 3tie | -9.30         |
| 3cj4 | -9.70         | 2ygb     | -9.50         | 3tid | -9.30         |
| 3cj4 | -9.70         | 2wr2     | -9.50         | 3sdy | -9.30         |
| 2hu4 | -9.70         | 1quv     | -9.50         | 3nfa | -9.30         |
| 1n5a | -9.70         | Main     |               | 3nfa | -9.30         |
| 1izh | -9.70         | protease | -9.40         | 3ku5 | -9.30         |
| 4uo3 | -9.60         | 4mmu     | -9.40         | 3iyp | -9.30         |
| 4uo3 | -9.60         | 4mms     | -9.40         | 3cj2 | -9.30         |
| 4uo3 | -9.60         | 4mgu     | -9.40         | 3avc | -9.30         |
| 4uo3 | -9.60         | 4m30     | -9.40         | 2x5i | -9.30         |
| 4uo3 | -9.60         | 4j4v     | -9.40         | 2vvw | -9.30         |
| 4rw8 | -9.60         | 4j4v     | -9.40         | 1v3c | -9.30         |
| 4mka | -9.60         | 4j4v     | -9.40         | 1v3b | -9.30         |
| 4mk8 | -9.60         | 4j4r     | -9.40         | 1v3b | -9.30         |
| 4m8x | -9.60         | 4cqz     | -9.40         | 1v2i | -9.30         |
| 4j6r | -9.60         | 4bgw     | -9.40         | 5ajm | -9.20         |
| 4j4v | -9.60         | 4adf     | -9.40         | 5ajm | -9.20         |
| 4i2p | -9.60         | 4adf     | -9.40         | 4unx | -9.20         |
| 4fqj | -9.60         | 4adf     | -9.40         | 4unx | -9.20         |
| 4eee | -9.60         | 4adf     | -9.40         | 4unx | -9.20         |
| 4cqz | -9.60         | 4adf     | -9.40         | 4unx | -9.20         |
| 4cqu | -9.60         | 4adf     | -9.40         | 4unx | -9.20         |
| 4bgw | -9.60         | 4a92     | -9.40         | 4mg3 | -9.20         |
| 3kqh | -9.60         | 3nf9     | -9.40         | 4lkk | -9.20         |
| 3gso | -9.60         | 3nf9     | -9.40         | 4kpp | -9.20         |
| 2wr4 | -9.60         | 3nf7     | -9.40         | 4hkj | -9.20         |
| 2wa1 | -9.60         | 3nf7     | -9.40         | 4cqp | -9.20         |
| 4uny | -9.50         | 3gsr     | -9.40         | 4bac | -9.20         |
| 4rw7 | -9.50         | 3gsq     | -9.40         | 4a92 | -9.20         |
| 4qhk | -9.50         | 3gsq     | -9.40         | 3zp0 | -9.20         |
| 4mze | -9.50         | 2wr7     | -9.40         | 3tid | -9.20         |
| 4mze | -9.50         | 2wr2     | -9.40         | 3sdy | -9.20         |
| 4m8y | -9.50         | 1v3e     | -9.40         | 3sdy | -9.20         |
| 4m8y | -9.50         | 1v3e     | -9.40         | 3ku5 | -9.20         |
| 4m8x | -9.50         | 1v3c     | -9.40         | 3ku3 | -9.20         |
| 4j4v | -9.50         | 1v2i     | -9.40         | 3d0g | -9.20         |
| 4j4v | -9.50         | 1a41     | -9.40         | 3cpl | -9.20         |
| 4i7f | -9.50         | 4rw9     | -9.30         | 3cj0 | -9.20         |
| 4i2q | -9.50         | 4mkb     | -9.30         | 3cj0 | -9.20         |
| 4cqu | -9.50         | 4lsr     | -9.30         | 3avg | -9.20         |
| 3se8 | -9.50         | 4j4v     | -9.30         | 3avb | -9.20         |
| 3se8 | -9.50         | 4eq0     | -9.30         | 2vvw | -9.20         |
|      |               |          |               | 5ajm | -9.10         |

| PDB  | Docking score | PDB  | Docking score | PDB       | Docking score |
|------|---------------|------|---------------|-----------|---------------|
| 4qru | -9.10         | 4fqv | -8.90         | 3rki      | -8.70         |
| 4opa | -9.10         | 4fp8 | -8.90         | 3lqa      | -8.70         |
| 4mk9 | -9.10         | 4ffz | -8.90         | 3gsn      | -8.70         |
| 4mg3 | -9.10         | 4eq0 | -8.90         | 3d23      | -8.70         |
| 4lst | -9.10         | 4e91 | -8.90         | 3ava      | -8.70         |
| 4kps | -9.10         | 4e5f | -8.90         | 3ava      | -8.70         |
| 4j4s | -9.10         | 4bgx | -8.90         | 2z35      | -8.70         |
| 4gag | -9.10         | 3zp6 | -8.90         | 2xi5      | -8.70         |
| 4gag | -9.10         | 3zp1 | -8.90         | 2xi5      | -8.70         |
| 4egt | -9.10         | 3su6 | -8.90         | 2wh6      | -8.70         |
| 4e5g | -9.10         | 3nf8 | -8.90         | 2oy0      | -8.70         |
| 3zp3 | -9.10         | 3nf8 | -8.90         | 2c36      | -8.70         |
| 3oah | -9.10         | 3mj5 | -8.90         | 2c36      | -8.70         |
| 3ku6 | -9.10         | 3mj5 | -8.90         | 1sk7      | -8.70         |
| 3ku6 | -9.10         | 3gsv | -8.90         | 1pk0      | -8.70         |
| 3gsx | -9.10         | 3d23 | -8.90         | 4fqi      | -8.60         |
| 3gsx | -9.10         | 3bwa | -8.90         | 4fqi      | -8.60         |
| 3d0i | -9.10         | 2zu4 | -8.90         | 4dgd      | -8.60         |
| 3cpl | -9.10         | 2xra | -8.90         | 4dga      | -8.60         |
| 3avb | -9.10         | 2mgu | -8.90         | 4dga      | -8.60         |
| 3alz | -9.10         | 1n59 | -8.90         | 4cqx      | -8.60         |
| 2xwy | -9.10         | 5ajm | -8.80         | 4cqr      | -8.60         |
| 2vvx | -9.10         | 4qhn | -8.80         | 4cqp      | -8.60         |
| 2ht5 | -9.10         | 4mj1 | -8.80         | 4cqp      | -8.60         |
| 1v3c | -9.10         | 4mj0 | -8.80         | 4cqp      | -8.60         |
| 1v3c | -9.10         | 4mds | -8.80         | 4cqp      | -8.60         |
| 1b50 | -9.10         | 4jo8 | -8.80         | 4bgz      | -8.60         |
| 5ajm | -9.00         | 4i2q | -8.80         | 3zp2      | -8.60         |
| 4pv9 | -9.00         | 4gv3 | -8.80         | 3nwa      | -8.60         |
| 4mk7 | -9.00         | 4g9d | -8.80         | 3nf7      | -8.60         |
| 4gaj | -9.00         | 4f3i | -8.80         | 3nf7      | -8.60         |
| 4gaj | -9.00         | 4e5j | -8.80         | 3ifu      | -8.60         |
| 4fp8 | -9.00         | 4dgd | -8.80         | 3i6g      | -8.60         |
| 3n0i | -9.00         | 4cqu | -8.80         | 3avj      | -8.60         |
| 3n0i | -9.00         | 4bgy | -8.80         | 2hfz      | -8.60         |
| 3gsu | -9.00         | 3v3m | -8.80         | Spike RBD | -8.50         |
| 3gsu | -9.00         | 3oah | -8.80         | 4uo6      | -8.50         |
| 3d0h | -9.00         | 3ku3 | -8.80         | 4uo6      | -8.50         |
| 3avh | -9.00         | 3gsv | -8.80         | 4oyd      | -8.50         |
| 2vvx | -9.00         | 3avh | -8.80         | 4fqy      | -8.50         |
| 1yh3 | -9.00         | 2oy0 | -8.80         | 4fqy      | -8.50         |
| 4qrt | -8.90         | 1rzj | -8.80         | 4fqi      | -8.50         |
| 4pv9 | -8.90         | 4mds | -8.70         | 4fb3      | -8.50         |
| 4mza | -8.90         | 4jpk | -8.70         | 4f3i      | -8.50         |
| 4mza | -8.90         | 4gv3 | -8.70         | 4ejk      | -8.50         |
| 4g8g | -8.90         | 4cqp | -8.70         | 4ejk      | -8.50         |
| 4g8g | -8.90         | 3zpa | -8.70         | 4ejk      | -8.50         |
| 4fqv | -8.90         | 3v3m | -8.70         | 4cqp      | -8.50         |

| PDB  | Docking score | PDB  | Docking score | PDB  | Docking score |
|------|---------------|------|---------------|------|---------------|
| 4cqq | -8.50         | 4dgc | -8.20         | 3kms | -8.00         |
| 4cqq | -8.50         | 4dgc | -8.20         | 2iph | -8.00         |
| 3zpb | -8.50         | 4dgc | -8.20         | 2iph | -8.00         |
| 3zpb | -8.50         | 4cqu | -8.20         | 2hcn | -8.00         |
| 3s13 | -8.50         | 4cqs | -8.20         | 1f08 | -8.00         |
| 3nwa | -8.50         | 4cqs | -8.20         | 4uo4 | -7.90         |
| 3avl | -8.50         | 4bh4 | -8.20         | 4qrt | -7.90         |
| 2x83 | -8.50         | 4bh4 | -8.20         | 4oph | -7.90         |
| 1rzk | -8.50         | 4bh4 | -8.20         | 4mmt | -7.90         |
| 4qhl | -8.40         | 4bh4 | -8.20         | 4jpi | -7.90         |
| 4jb9 | -8.40         | 4bh1 | -8.20         | 4gye | -7.90         |
| 4gve | -8.40         | 4bh1 | -8.20         | 4gye | -7.90         |
| 4cr0 | -8.40         | 4bh1 | -8.20         | 3uf5 | -7.90         |
| 4cqq | -8.40         | 3nf9 | -8.20         | 3su0 | -7.90         |
| 4bgx | -8.40         | 3avg | -8.20         | 3rwj | -7.90         |
| 3ztn | -8.40         | 2zu5 | -8.20         | 3rwj | -7.90         |
| 3u82 | -8.40         | 2iph | -8.20         | 3nwf | -7.90         |
| 3u82 | -8.40         | 2ghw | -8.20         | 2vvy | -7.90         |
| 3su1 | -8.40         | 2ge7 | -8.20         | 1p9s | -7.90         |
| 3avn | -8.40         | 4pv8 | -8.10         | 1b53 | -7.90         |
| 3avb | -8.40         | 4pv8 | -8.10         | 4gv9 | -7.80         |
| 3avb | -8.40         | 4eqj | -8.10         | 4ejd | -7.80         |
| 3ava | -8.40         | 4ep3 | -8.10         | 4ejd | -7.80         |
| 3ava | -8.40         | 4ep3 | -8.10         | 4ejd | -7.80         |
| 3alx | -8.40         | 4dkr | -8.10         | 4ejd | -7.80         |
| 2yol | -8.40         | 4dgc | -8.10         | 4ejd | -7.80         |
| 2yol | -8.40         | 4dgc | -8.10         | 4dkq | -7.80         |
| 2x83 | -8.40         | 4dgc | -8.10         | 4dko | -7.80         |
| 2htu | -8.40         | 4co6 | -8.10         | 3sis | -7.80         |
| 5ajm | -8.30         | 4bh3 | -8.10         | 3nw8 | -7.80         |
| 4gzf | -8.30         | 4bh3 | -8.10         | 3nf6 | -7.80         |
| 4gzf | -8.30         | 4bh3 | -8.10         | 3nf6 | -7.80         |
| 4e92 | -8.30         | 4bh3 | -8.10         | 3avn | -7.80         |
| 4bh2 | -8.30         | 3vbh | -8.10         | 2iph | -7.80         |
| 3suf | -8.30         | 3vbf | -8.10         | 2c7u | -7.80         |
| 3su0 | -8.30         | 3vbf | -8.10         | 1rv7 | -7.80         |
| 3nfa | -8.30         | 3ro5 | -8.10         | 4mj1 | -7.70         |
| 3nfa | -8.30         | 3kmq | -8.10         | 4ejd | -7.70         |
| 3nf9 | -8.30         | 3avf | -8.10         | 4dgb | -7.70         |
| 2axf | -8.30         | 1sys | -8.10         | 3su2 | -7.70         |
| 2axf | -8.30         | 4lsu | -8.00         | 3su2 | -7.70         |
| 1r6a | -8.30         | 4lsu | -8.00         | 3sis | -7.70         |
| 4qrt | -8.20         | 4i32 | -8.00         | 3s12 | -7.70         |
| 4mmv | -8.20         | 4g8i | -8.00         | 3rwi | -7.70         |
| 4i31 | -8.20         | 4dkp | -8.00         | 3p8o | -7.70         |
| 4i31 | -8.20         | 3sv8 | -8.00         | 3p8n | -7.70         |
| 4g9d | -8.20         | 3sud | -8.00         | 3avl | -7.70         |
| 4e92 | -8.20         | 3su2 | -8.00         | 4dgb | -7.60         |

| PDB      | Docking score | PDB  | Docking score | PDB  | Docking score |
|----------|---------------|------|---------------|------|---------------|
| 3uqi     | -7.60         | 3sug | -7.30         | 2zol | -6.70         |
| 3avk     | -7.60         | 3sue | -7.30         | 2yhh | -6.70         |
| 2bvq     | -7.60         | 2zu1 | -7.30         | 2y1s | -6.70         |
| 1rq9     | -7.60         | 2yka | -7.30         | 2q7c | -6.70         |
| 4iv3     | -7.50         | 2xpx | -7.30         | 2q7c | -6.70         |
| 4g8i     | -7.50         | 2xpx | -7.30         | 4b4n | -6.60         |
| 3sud     | -7.50         | 2q7c | -7.30         | 4b4n | -6.60         |
| 3m5i     | -7.50         | 2q7c | -7.30         | 3avj | -6.60         |
| 3m5h     | -7.50         | 2q7c | -7.30         | 2q7c | -6.60         |
| 3gzf     | -7.50         | 2ghv | -7.30         | 2q5u | -6.60         |
| 3alw     | -7.50         | 1rpi | -7.30         | 2q5u | -6.60         |
| 2xya     | -7.50         | 3sv7 | -7.20         | 2q5u | -6.60         |
| 2wh6     | -7.50         | 3sv7 | -7.20         | 2q5u | -6.60         |
| 2wfo     | -7.50         | 3su1 | -7.20         | 2q5u | -6.60         |
| 2ge8     | -7.50         | 3avc | -7.20         | 2q5u | -6.60         |
| 2ca1     | -7.50         | 2xze | -7.20         | 1zsd | -6.60         |
| 4uoa     | -7.40         | 2wfo | -7.20         | 4mod | -6.50         |
| 4c1w     | -7.40         | 2v6q | -7.20         | 4mod | -6.50         |
| 3uqi     | -7.40         | 4oyd | -7.10         | 4lkh | -6.50         |
| 3su3     | -7.40         | 4nwk | -7.10         | 3vie | -6.50         |
| 3su3     | -7.40         | 4lss | -7.10         | 3su5 | -6.50         |
| 3sit     | -7.40         | 4c1w | -7.10         | 3rkc | -6.50         |
| 3sit     | -7.40         | 4b8e | -7.10         | 3avk | -6.50         |
| 3sit     | -7.40         | 4b8e | -7.10         | 2g69 | -6.50         |
| 3sit     | -7.40         | 4b8e | -7.10         | 2g69 | -6.50         |
| 3sit     | -7.40         | 3sv9 | -7.10         | 4nwk | -6.40         |
| 3sit     | -7.40         | 3sv9 | -7.10         | 4i33 | -6.40         |
| 3rwf     | -7.40         | 3su6 | -7.10         | 3b71 | -6.40         |
| 3rwf     | -7.40         | 2zty | -7.10         | 3b71 | -6.40         |
| 3gsw     | -7.40         | 3w39 | -7.00         | 2l2f | -6.40         |
| 2xze     | -7.40         | 3a07 | -7.00         | 4epj | -6.30         |
| 2lsp     | -7.40         | 2zu3 | -7.00         | 3u83 | -6.30         |
| 1z8r     | -7.40         | 2vxw | -7.00         | 3su4 | -6.30         |
| 1rpi     | -7.40         | 1qr9 | -7.00         | 4ipz | -6.20         |
| 1qz8     | -7.40         | 1qr8 | -7.00         | 4ipz | -6.20         |
| Papain   | -7.30         | 4lsp | -6.90         | 4ipz | -6.20         |
| protease | -7.30         | 4g2k | -6.90         | 4ipz | -6.20         |
| 4mj0     | -7.30         | 3sv6 | -6.90         | 4ipz | -6.20         |
| 4iv1     | -7.30         | 2yhf | -6.90         | 4ipz | -6.20         |
| 4ffy     | -7.30         | 2me2 | -6.90         | 4ipz | -6.20         |
| 4ekx     | -7.30         | 2gvf | -6.90         | 4ipz | -6.20         |
| 4ejd     | -7.30         | 4g2k | -6.80         | 4ipz | -6.20         |
| 4ejd     | -7.30         | 3sv6 | -6.80         | 4ipz | -6.20         |
| 4ejd     | -7.30         | 3su5 | -6.80         | 3u83 | -6.20         |
| 4dmn     | -7.30         | 3m5g | -6.80         | 3su4 | -6.20         |
| 4dmn     | -7.30         | 4nwl | -6.70         | 4ipz | -6.10         |
| 3vie     | -7.30         | 3su5 | -6.70         | 4ipz | -6.10         |
| 3sug     | -7.30         | 2ztz | -6.70         | 4epj | -6.00         |

| PDB  | Docking score | PDB  | Docking score | PDB  | Docking score |
|------|---------------|------|---------------|------|---------------|
| 2c3a | -6.00         | 4ep2 | -4.70         | 4dge | -1.60         |
| 2m3l | -5.90         | 1hhg | -4.70         | 4gu3 | -1.40         |
| 2vxj | -5.80         | 3j23 | -4.50         | 4gu3 | -1.40         |
| 2c86 | -5.80         | 3j22 | -4.50         | 4gu3 | -1.40         |
| 4ejr | -5.60         | 4lcx | -4.40         | 4gu3 | -1.40         |
| 2me4 | -5.60         | 4lki | -3.90         | 4gu3 | -1.40         |
| 2me3 | -5.60         | 2l3h | -3.90         | 4gu3 | -1.40         |
| 3giv | -5.50         | 4qhm | -3.30         | 4gu3 | -1.40         |
| 2m3m | -5.50         | 2jw8 | -3.00         | 4gu3 | -1.40         |
| 4adq | -5.40         | 4g1g | -2.80         | 4gu3 | -1.40         |
| 3kqk | -5.40         | 3vu5 | -2.70         | 4gu3 | -1.40         |
| 2x9m | -5.40         | 4gu4 | -2.00         | 4gu3 | -1.40         |
| 4adq | -5.30         | 4gu4 | -2.00         | 4gu3 | -1.40         |
| 3zd0 | -5.30         | 4gu4 | -2.00         | 4g1o | -1.30         |
| 3vtt | -5.30         | 4gu4 | -2.00         | 2zsv | -1.30         |
| 3vtt | -5.30         | 4gu4 | -2.00         | 2zsv | -1.10         |
| 2mkr | -5.30         | 4gu4 | -2.00         | 4kol | -1.00         |
| 3m5j | -5.10         | 3vu5 | -2.00         | 4e0r | -0.70         |
| 4ep2 | -5.00         | 1knz | -2.00         | 4fqm | -0.10         |
| 3i6k | -4.90         | 4kom | -1.70         |      |               |

**Table S5.** Predicted docking score of Conivaptan against the viral protein panel.

| PDB  | Docking score | PDB  | Docking score | PDB  | Docking score |
|------|---------------|------|---------------|------|---------------|
| 4wm7 | -13.90        | 3rwd | -11.60        | 4fnk | -11.20        |
| 3b0w | -13.10        | 3kqh | -11.60        | 3t3c | -11.20        |
| 3nxu | -12.70        | 2wrc | -11.60        | 3rwi | -11.20        |
| 4f3z | -12.30        | 1hhj | -11.60        | 3kqn | -11.20        |
| 4mmr | -11.90        | 4g42 | -11.50        | 3kqn | -11.20        |
| 3bw9 | -11.90        | 2wrg | -11.50        | 3kqn | -11.20        |
| 1idb | -11.90        | 2wrg | -11.50        | 3gsr | -11.20        |
| 3bwa | -11.80        | 2wrg | -11.50        | 3fku | -11.20        |
| 4m8y | -11.70        | 2wrg | -11.50        | 2wr3 | -11.20        |
| 4m8y | -11.70        | 1hhk | -11.50        | 2gec | -11.20        |
| 4m8x | -11.70        | 4j4v | -11.40        | 2axg | -11.20        |
| 4m8x | -11.70        | 4j4v | -11.40        | 1hhh | -11.20        |
| 3r4b | -11.70        | 4j4v | -11.40        | 4unx | -11.10        |
| 3bwa | -11.70        | 4j4v | -11.40        | 4unx | -11.10        |
| 3bw9 | -11.70        | 4j4v | -11.40        | 4unx | -11.10        |
| 2wr1 | -11.70        | 3gso | -11.40        | 4unx | -11.10        |
| 2wr1 | -11.70        | 3gso | -11.40        | 4qru | -11.10        |
| 2i4x | -11.70        | 2wrg | -11.40        | 4j4u | -11.10        |
| 2hjk | -11.70        | 4k7f | -11.30        | 4i2p | -11.10        |
| 2hcs | -11.70        | 2i4u | -11.30        | 4i2p | -11.10        |
| 2bvp | -11.70        | 2gec | -11.30        | 4fqr | -11.10        |
| 2bvo | -11.70        | 4qru | -11.20        | 4fqr | -11.10        |
| 1syv | -11.70        | 4qrs | -11.20        | 3vcl | -11.10        |
| 1klm | -11.70        | 4k7f | -11.20        | 3u7s | -11.10        |

| PDB  | Docking score | PDB  | Docking score | PDB  | Docking score |
|------|---------------|------|---------------|------|---------------|
| 3t3c | -11.10        | 4bac | -10.80        | 4uo0 | -10.50        |
| 3rwe | -11.10        | 3s11 | -10.80        | 4uo0 | -10.50        |
| 3rwe | -11.10        | 3pqy | -10.80        | 4uo0 | -10.50        |
| 3rwc | -11.10        | 3gsq | -10.80        | 4lsr | -10.50        |
| 3rwc | -11.10        | 2wrh | -10.80        | 4cey | -10.50        |
| 3gsw | -11.10        | 2wr1 | -10.80        | 4cew | -10.50        |
| 3ggu | -11.10        | 4rw4 | -10.70        | 4cdx | -10.50        |
| 1r6a | -11.10        | 4pg2 | -10.70        | 4cdw | -10.50        |
| 1hhi | -11.10        | 4mka | -10.70        | 3tid | -10.50        |
| 4uo3 | -11.00        | 4mk8 | -10.70        | 3koa | -10.50        |
| 4uo3 | -11.00        | 4j4y | -10.70        | 3hkw | -10.50        |
| 4uo3 | -11.00        | 4ejl | -10.70        | 3h98 | -10.50        |
| 4uo3 | -11.00        | 4ejl | -10.70        | 3h2l | -10.50        |
| 4uo3 | -11.00        | 4ej8 | -10.70        | 3h2l | -10.50        |
| 4rw8 | -11.00        | 4e7a | -10.70        | 3cj2 | -10.50        |
| 4rw7 | -11.00        | 4e7a | -10.70        | 2wr0 | -10.50        |
| 4j4x | -11.00        | 4adf | -10.70        | 2wr0 | -10.50        |
| 4j4w | -11.00        | 4adf | -10.70        | 2wr0 | -10.50        |
| 4g9f | -11.00        | 4adf | -10.70        | 2wr0 | -10.50        |
| 4cdu | -11.00        | 4adf | -10.70        | 2wr0 | -10.50        |
| 4bh0 | -11.00        | 4adf | -10.70        | 4uo5 | -10.40        |
| 3u7s | -11.00        | 4adf | -10.70        | 4uo5 | -10.40        |
| 3lkh | -11.00        | 4a92 | -10.70        | 4uo0 | -10.40        |
| 3lkh | -11.00        | 3ztj | -10.70        | 4mk9 | -10.40        |
| 3i6l | -11.00        | 3rki | -10.70        | 4fnk | -10.40        |
| 3gsw | -11.00        | 1p9u | -10.70        | 4e5e | -10.40        |
| 2i4d | -11.00        | 1izi | -10.70        | 3se8 | -10.40        |
| 4unw | -10.90        | 4uny | -10.60        | 3rwg | -10.40        |
| 4unw | -10.90        | 4mk8 | -10.60        | 2wa1 | -10.40        |
| 4qrs | -10.90        | 4cdq | -10.60        | 1v3d | -10.40        |
| 3vcl | -10.90        | 4a92 | -10.60        | 1v3d | -10.40        |
| 3rwh | -10.90        | 3vbr | -10.60        | 1a41 | -10.40        |
| 3rwh | -10.90        | 3vbo | -10.60        | 4uo0 | -10.30        |
| 3iyw | -10.90        | 3tid | -10.60        | 4uo0 | -10.30        |
| 3iyw | -10.90        | 3r4b | -10.60        | 4uo0 | -10.30        |
| 3iyw | -10.90        | 3n0i | -10.60        | 4mkb | -10.30        |
| 3iyw | -10.90        | 3n0i | -10.60        | 4j4s | -10.30        |
| 3iyw | -10.90        | 3hkw | -10.60        | 4j4s | -10.30        |
| 3iyw | -10.90        | 3hkw | -10.60        | 4gua | -10.30        |
| 3iyw | -10.90        | 3h98 | -10.60        | 3se8 | -10.30        |
| 3gsq | -10.90        | 3bev | -10.60        | 3rwg | -10.30        |
| 2xi5 | -10.90        | 2i4w | -10.60        | 3ku3 | -10.30        |
| 2xi5 | -10.90        | 2i4v | -10.60        | 3cj5 | -10.30        |
| 4uo5 | -10.80        | 4uo0 | -10.50        | 3cj2 | -10.30        |
| 4unw | -10.80        | 4uo0 | -10.50        | 1quv | -10.30        |
| 4q6r | -10.80        | 4uo0 | -10.50        | 1ida | -10.30        |
| 4q6r | -10.80        | 4uo0 | -10.50        | 4wm8 | -10.20        |
| 4o44 | -10.80        | 4uo0 | -10.50        | 4uo0 | -10.20        |
| 4ej8 | -10.80        | 4uo0 | -10.50        | 4uo0 | -10.20        |

| PDB  | Docking score | PDB  | Docking score | PDB  | Docking score |
|------|---------------|------|---------------|------|---------------|
| 4uo0 | -10.20        | 3cj4 | -10.00        | 4fqi | -9.60         |
| 4rw4 | -10.20        | 3cj4 | -10.00        | 4dag | -9.60         |
| 4mka | -10.20        | 2ygc | -10.00        | 4cqW | -9.60         |
| 4mk7 | -10.20        | 2ygc | -10.00        | 3zp2 | -9.60         |
| 4lsv | -10.20        | 2wre | -10.00        | 3u82 | -9.60         |
| 4g43 | -10.20        | 2wre | -10.00        | 4qhl | -9.50         |
| 4e78 | -10.20        | 1b53 | -10.00        | 4gag | -9.50         |
| 4e78 | -10.20        | 4uo2 | -9.90         | 4gag | -9.50         |
| 3tie | -10.20        | 4uo2 | -9.90         | 4fp8 | -9.50         |
| 3tie | -10.20        | 4qhk | -9.90         | 4cqz | -9.50         |
| 3kql | -10.20        | 4pv9 | -9.90         | 3u82 | -9.50         |
| 3kql | -10.20        | 4j4r | -9.90         | 3kql | -9.50         |
| 3hky | -10.20        | 4fqy | -9.90         | 3cpl | -9.50         |
| 3cj5 | -10.20        | 4fqy | -9.90         | 5ajm | -9.40         |
| 3cj3 | -10.20        | 3cj3 | -9.90         | 5ajm | -9.40         |
| 3bew | -10.20        | 3cj0 | -9.90         | 5ajm | -9.40         |
| 2vVx | -10.20        | 4rw6 | -9.80         | 4mza | -9.40         |
| 2vVx | -10.20        | 4pv9 | -9.80         | 4mza | -9.40         |
| 1izh | -10.20        | 4mk9 | -9.80         | 4mj0 | -9.40         |
| 4uo7 | -10.10        | 4jb9 | -9.80         | 4j6r | -9.40         |
| 4uo2 | -10.10        | 4e5f | -9.80         | 4egt | -9.40         |
| 4uo2 | -10.10        | 4cqQ | -9.80         | 4cqz | -9.40         |
| 4uo0 | -10.10        | 3se9 | -9.80         | 4cqX | -9.40         |
| 4uo0 | -10.10        | 3hky | -9.80         | 4cqQ | -9.40         |
| 4uo0 | -10.10        | 3ggU | -9.80         | 3zpb | -9.40         |
| 4rw9 | -10.10        | 3d0g | -9.80         | 3zpb | -9.40         |
| 4mkb | -10.10        | 3ciz | -9.80         | 3zp1 | -9.40         |
| 4mk7 | -10.10        | 3alz | -9.80         | 3vbh | -9.40         |
| 4mgu | -10.10        | 2wr7 | -9.80         | 3klv | -9.40         |
| 4fqj | -10.10        | 2wr2 | -9.80         | 3d0h | -9.40         |
| 4e5g | -10.10        | 2wr2 | -9.80         | 3cpl | -9.40         |
| 3ok9 | -10.10        | 2wr2 | -9.80         | 3alx | -9.40         |
| 3cj0 | -10.10        | 2hu4 | -9.80         | 2vVw | -9.40         |
| 2ygb | -10.10        | 2hu4 | -9.80         | 2c36 | -9.40         |
| 2ygb | -10.10        | 2hu4 | -9.80         | 2c36 | -9.40         |
| 4uo7 | -10.00        | 2hu4 | -9.80         | 5ajm | -9.30         |
| 4uo7 | -10.00        | 1n5a | -9.80         | 4uo6 | -9.30         |
| 4uo7 | -10.00        | 4uo6 | -9.70         | 4uo3 | -9.30         |
| 4uo7 | -10.00        | 4lst | -9.70         | 4uo3 | -9.30         |
| 4uo7 | -10.00        | 4cqQ | -9.70         | 4o4g | -9.30         |
| 4uo2 | -10.00        | 3ciz | -9.70         | 4mds | -9.30         |
| 4uo2 | -10.00        | 2wre | -9.70         | 4mds | -9.30         |
| 4e76 | -10.00        | 1v3c | -9.70         | 4jo8 | -9.30         |
| 4cqV | -10.00        | 1v3c | -9.70         | 3mlh | -9.30         |
| 3kna | -10.00        | 1rzj | -9.70         | 3avf | -9.30         |
| 3ebj | -10.00        | 4qhn | -9.60         | 2wrf | -9.30         |
| 3d23 | -10.00        | 4gaj | -9.60         | 2wre | -9.30         |
| 3d23 | -10.00        | 4gaj | -9.60         | 2wr4 | -9.30         |

| PDB  | Docking score | PDB  | Docking score | PDB  | Docking score |
|------|---------------|------|---------------|------|---------------|
| 2oy0 | -9.30         | 4cr0 | -9.00         | 4cqp | -8.80         |
| 2hty | -9.30         | 4cqs | -9.00         | 4bgz | -8.80         |
| 4mmu | -9.20         | 4bh1 | -9.00         | 3zpa | -8.80         |
| 4g9f | -9.20         | 4bgy | -9.00         | 3sdy | -8.80         |
| 4g8g | -9.20         | 4bgx | -9.00         | 3sdy | -8.80         |
| 4fqi | -9.20         | 3nfa | -9.00         | 3lqa | -8.80         |
| 4fqi | -9.20         | 3nf6 | -9.00         | 2htw | -8.80         |
| 4e5j | -9.20         | 3nf6 | -9.00         | 1sk7 | -8.80         |
| 4cqr | -9.20         | 3gsv | -9.00         | 5ajm | -8.70         |
| 4co6 | -9.20         | 2wre | -9.00         | 4u6h | -8.70         |
| 4bgx | -9.20         | 2wre | -9.00         | 4m30 | -8.70         |
| 3ku6 | -9.20         | 2uv0 | -9.00         | 4i7f | -8.70         |
| 3ku6 | -9.20         | 2uv0 | -9.00         | 4fqv | -8.70         |
| 3ifu | -9.20         | 2uv0 | -9.00         | 4f3i | -8.70         |
| 2x83 | -9.20         | 2uv0 | -9.00         | 4cqy | -8.70         |
| 2vww | -9.20         | 2uv0 | -9.00         | 4cqu | -8.70         |
| 2hu0 | -9.20         | 2uv0 | -9.00         | 4cqu | -8.70         |
| 1r6a | -9.20         | 2uv0 | -9.00         | 4cqu | -8.70         |
| 4uo3 | -9.10         | 2uv0 | -9.00         | 4cqu | -8.70         |
| 4opa | -9.10         | 2uv0 | -9.00         | 4bh2 | -8.70         |
| 4mj1 | -9.10         | 2uv0 | -9.00         | 4bh2 | -8.70         |
| 4mg3 | -9.10         | 2uv0 | -9.00         | 3nwf | -8.70         |
| 4mg3 | -9.10         | 2uv0 | -9.00         | 3nw8 | -8.70         |
| 4g8g | -9.10         | 2ghw | -9.00         | 2x83 | -8.70         |
| 4fp8 | -9.10         | 4pv8 | -8.90         | 1v2i | -8.70         |
| 4e91 | -9.10         | 4mj1 | -8.90         | 1v2i | -8.70         |
| 4dgd | -9.10         | 4kps | -8.90         | 4lsu | -8.60         |
| 4cqr | -9.10         | 4g9z | -8.90         | 4f3i | -8.60         |
| 4bh1 | -9.10         | 4ffz | -8.90         | 4b8e | -8.60         |
| 4bh1 | -9.10         | 4dkq | -8.90         | 4b8e | -8.60         |
| 4bgw | -9.10         | 4cqs | -8.90         | 3zp0 | -8.60         |
| 3zp3 | -9.10         | 4bgw | -8.90         | 3sv6 | -8.60         |
| 3oah | -9.10         | 3s13 | -8.90         | 3oah | -8.60         |
| 3nfa | -9.10         | 3ku5 | -8.90         | 3avh | -8.60         |
| 3ku3 | -9.10         | 3ku5 | -8.90         | 1v3e | -8.60         |
| 3i6g | -9.10         | 1v3e | -8.90         | 1p9s | -8.60         |
| 3gsv | -9.10         | 1sys | -8.90         | 4qru | -8.50         |
| 2xwy | -9.10         | 5ajm | -8.80         | 4lsu | -8.50         |
| 2xra | -9.10         | 4mj0 | -8.80         | 4ep3 | -8.50         |
| 2oy0 | -9.10         | 4iv3 | -8.80         | 4ep3 | -8.50         |
| 2ht5 | -9.10         | 4fqv | -8.80         | 4b8e | -8.50         |
| 1v3b | -9.10         | 4cqu | -8.80         | 3nf9 | -8.50         |
| 4uo3 | -9.00         | 4cqu | -8.80         | 3nf9 | -8.50         |
| 4uo3 | -9.00         | 4cqp | -8.80         | 3avg | -8.50         |
| 4pv8 | -9.00         | 4cqp | -8.80         | 3ava | -8.50         |
| 4kpq | -9.00         | 4cqp | -8.80         | 3ava | -8.50         |
| 4i2q | -9.00         | 4cqp | -8.80         | 2zu5 | -8.50         |
| 4e5l | -9.00         | 4cqp | -8.80         | 2z35 | -8.50         |



| PDB             | Docking score | PDB  | Docking score | PDB       | Docking score |
|-----------------|---------------|------|---------------|-----------|---------------|
| 2htu            | -8.50         | 3nf8 | -8.20         | 3su5      | -7.90         |
| 1pk0            | -8.50         | 3nf6 | -8.20         | 3gsx      | -7.90         |
| Main protease   | -8.40         | 3nf6 | -8.20         | 3gsx      | -7.90         |
| 4g9z            | -8.40         | 3gsu | -8.20         | 2zu4      | -7.90         |
| 3ztn            | -8.40         | 3gsu | -8.20         | 2zu1      | -7.90         |
| 3sdy            | -8.40         | 3bwa | -8.20         | 2q7c      | -7.90         |
| 3ro5            | -8.40         | 3avl | -8.20         | 2q7c      | -7.90         |
| 3nf9            | -8.40         | 3avb | -8.20         | 2q7c      | -7.90         |
| 3nf9            | -8.40         | 2ge8 | -8.20         | 2mgu      | -7.90         |
| 3nf7            | -8.40         | 1yh3 | -8.20         | 2ca1      | -7.90         |
| 3nf7            | -8.40         | 1n59 | -8.20         | 2axf      | -7.90         |
| 3avh            | -8.40         | 4qrt | -8.10         | 4gzf      | -7.80         |
| 3avc            | -8.40         | 4oph | -8.10         | 4gzf      | -7.80         |
| 1rv7            | -8.40         | 4i31 | -8.10         | 4gv9      | -7.80         |
| Papain protease | -8.30         | 4i31 | -8.10         | 4ejk      | -7.80         |
| 4uo8            | -8.30         | 3sv9 | -8.10         | 3sv7      | -7.80         |
| 4qrt            | -8.30         | 3sv7 | -8.10         | 2lsp      | -7.80         |
| 4pv9            | -8.30         | 3rwi | -8.10         | 2c7u      | -7.80         |
| 4mmv            | -8.30         | 3mj5 | -8.10         | 1rq9      | -7.80         |
| 4gve            | -8.30         | 3mj5 | -8.10         | 1rpi      | -7.80         |
| 4e5i            | -8.30         | 3avl | -8.10         | 1oop      | -7.80         |
| 3zp6            | -8.30         | 3avj | -8.10         | 4lss      | -7.70         |
| 3nf8            | -8.30         | 2yka | -8.10         | 4ejk      | -7.70         |
| 3nf8            | -8.30         | 1v3c | -8.10         | 4ejd      | -7.70         |
| 3nf7            | -8.30         | 1v3c | -8.10         | 4dkp      | -7.70         |
| 3nf7            | -8.30         | 1v3b | -8.10         | 3sit      | -7.70         |
| 3avb            | -8.30         | 4mms | -8.00         | 3sit      | -7.70         |
| 3avb            | -8.30         | 4lkj | -8.00         | 3sit      | -7.70         |
| 3avb            | -8.30         | 4ffv | -8.00         | 3sit      | -7.70         |
| 3ava            | -8.30         | 4dkr | -8.00         | 3sit      | -7.70         |
| 3ava            | -8.30         | 3v3m | -8.00         | 3sit      | -7.70         |
| 3ava            | -8.30         | 3v3m | -8.00         | 3gsr      | -7.70         |
| 2xze            | -8.30         | 3uf5 | -8.00         | 2ztz      | -7.70         |
| 2v6q            | -8.30         | 3avg | -8.00         | 2ge7      | -7.70         |
| 4i32            | -8.20         | 2hcn | -8.00         | 1rpi      | -7.70         |
| 4dko            | -8.20         | 2ghv | -8.00         | Spike RBD | -7.60         |
| 4dgd            | -8.20         | 4jpk | -7.90         | 4lsp      | -7.60         |
| 3sv9            | -8.20         | 4i2q | -7.90         | 4ipz      | -7.60         |
| 3su1            | -8.20         | 4hkj | -7.90         | 4gv3      | -7.60         |
| 3rwj            | -8.20         | 4fvu | -7.90         | 4gv3      | -7.60         |
| 3rwj            | -8.20         | 4fb3 | -7.90         | 4ejk      | -7.60         |
| 3o4l            | -8.20         | 3vbf | -7.90         | 4ejd      | -7.60         |
| 3nwa            | -8.20         | 3vbf | -7.90         | 4ejd      | -7.60         |
| 3nwa            | -8.20         | 3sug | -7.90         | 4bh3      | -7.60         |
| 3nfa            | -8.20         | 3sug | -7.90         | 4bh3      | -7.60         |
| 3nfa            | -8.20         | 3su6 | -7.90         | 4bh3      | -7.60         |
| 3nfa            | -8.20         | 3su5 | -7.90         | 4bh3      | -7.60         |
| 3nf8            | -8.20         | 3su5 | -7.90         | 3su1      | -7.60         |

| PDB  | Docking score | PDB  | Docking score | PDB  | Docking score |
|------|---------------|------|---------------|------|---------------|
| 3rwf | -7.60         | 4ejd | -7.20         | 2q5u | -6.80         |
| 3rwf | -7.60         | 3sis | -7.20         | 2q5u | -6.80         |
| 3d0i | -7.60         | 3avk | -7.20         | 2q5u | -6.80         |
| 2xze | -7.60         | 2iph | -7.20         | 2q5u | -6.80         |
| 2axf | -7.60         | 4eq0 | -7.10         | 2q5u | -6.80         |
| 4mmt | -7.50         | 4ejd | -7.10         | 2q5u | -6.80         |
| 4ipz | -7.50         | 4ejd | -7.10         | 1z8r | -6.80         |
| 4ipz | -7.50         | 4dmn | -7.10         | 1qr9 | -6.80         |
| 4ipz | -7.50         | 3kmq | -7.10         | 4ekx | -6.70         |
| 4ipz | -7.50         | 2zol | -7.10         | 4dga | -6.70         |
| 4dgc | -7.50         | 4jpi | -7.00         | 4dga | -6.70         |
| 3uqi | -7.50         | 4gye | -7.00         | 3vie | -6.70         |
| 3uqi | -7.50         | 4gye | -7.00         | 3m5i | -6.70         |
| 3sv8 | -7.50         | 4eee | -7.00         | 2yhf | -6.70         |
| 3su3 | -7.50         | 4e92 | -7.00         | 2y1s | -6.70         |
| 3su3 | -7.50         | 4e92 | -7.00         | 2m3l | -6.70         |
| 3su0 | -7.50         | 4dmn | -7.00         | 4i33 | -6.60         |
| 3m5h | -7.50         | 4bh4 | -7.00         | 3s12 | -6.60         |
| 2zty | -7.50         | 4bh4 | -7.00         | 3kms | -6.60         |
| 2wh6 | -7.50         | 4bh4 | -7.00         | 4oyd | -6.50         |
| 2gvf | -7.50         | 4bh4 | -7.00         | 3p8n | -6.50         |
| 4uo4 | -7.40         | 3su2 | -7.00         | 3avc | -6.50         |
| 4iv1 | -7.40         | 3su2 | -7.00         | 2iph | -6.50         |
| 4dgc | -7.40         | 3su0 | -7.00         | 2iph | -6.50         |
| 4dgc | -7.40         | 3rkc | -7.00         | 4nwk | -6.40         |
| 4dgc | -7.40         | 3gsw | -7.00         | 3u83 | -6.40         |
| 4dgc | -7.40         | 2yol | -7.00         | 3u83 | -6.40         |
| 4dgc | -7.40         | 2yol | -7.00         | 3su4 | -6.40         |
| 3sud | -7.40         | 2wfo | -7.00         | 3su4 | -6.40         |
| 3su6 | -7.40         | 2q7c | -7.00         | 2wfo | -6.40         |
| 3su2 | -7.40         | 2q7c | -7.00         | 2l2f | -6.40         |
| 3avn | -7.40         | 2q7c | -7.00         | 4qrt | -6.30         |
| 3alw | -7.40         | 2c86 | -7.00         | 4nwk | -6.30         |
| 2xya | -7.40         | 4dgb | -6.90         | 3sv6 | -6.30         |
| 2iph | -7.40         | 4b4n | -6.90         | 2me4 | -6.30         |
| 2bvq | -7.40         | 4b4n | -6.90         | 1f08 | -6.30         |
| 4oyd | -7.30         | 3w39 | -6.90         | 4c1w | -6.20         |
| 4jki | -7.30         | 2vxw | -6.90         | 3p8o | -6.20         |
| 4jki | -7.30         | 2g69 | -6.90         | 2xpx | -6.20         |
| 4ipz | -7.30         | 2g69 | -6.90         | 2xpx | -6.20         |
| 4epj | -7.30         | 1rzk | -6.90         | 2m3m | -6.20         |
| 3sis | -7.30         | 4nwl | -6.80         | 4mze | -6.10         |
| 3gzf | -7.30         | 4eq0 | -6.80         | 4mze | -6.10         |
| 3a07 | -7.30         | 4dgb | -6.80         | 4mod | -6.10         |
| 2vvy | -7.30         | 3b71 | -6.80         | 4ejd | -6.10         |
| 2me2 | -7.30         | 3b71 | -6.80         | 4ejd | -6.10         |
| 1qz8 | -7.30         | 2yhh | -6.80         | 4ejd | -6.10         |
| 1b50 | -7.30         | 2wh6 | -6.80         | 3sud | -6.10         |

| PDB  | Docking score | PDB  | Docking score | PDB  | Docking score |
|------|---------------|------|---------------|------|---------------|
| 3gsn | -6.10         | 4adq | -5.70         | 3j22 | -5.00         |
| 2zu3 | -6.10         | 4adq | -5.70         | 1qr8 | -5.00         |
| 2c3a | -6.10         | 2vxj | -5.70         | 4epj | -4.40         |
| 4mod | -6.00         | 4g8i | -5.60         | 4qhm | -3.50         |
| 4ipz | -6.00         | 4c1w | -5.60         | 2l3h | -3.30         |
| 4g9d | -6.00         | 3suf | -5.60         | 4lcx | -2.70         |
| 3giv | -6.00         | 3sue | -5.60         | 4dge | -1.60         |
| 3avj | -6.00         | 3vtt | -5.40         | 4lkk | -1.20         |
| 2hfz | -6.00         | 3vtt | -5.40         | 4g2k | -1.00         |
| 4ipz | -5.90         | 3vie | -5.40         | 4g2k | -0.90         |
| 4ipz | -5.90         | 3i6k | -5.40         | 2zsv | -0.90         |
| 4ipz | -5.90         | 3avn | -5.40         | 2zsv | -0.90         |
| 4ipz | -5.90         | 4eqj | -5.30         | 4e0r | -0.50         |
| 4g9d | -5.90         | 3zd0 | -5.30         | 4fqm | -0.30         |
| 4g8i | -5.90         | 3kqk | -5.30         |      |               |
| 3avk | -5.90         | 4ep2 | -5.20         |      |               |
| 1zsd | -5.90         | 2mkr | -5.20         |      |               |
| 4ipz | -5.80         | 2me3 | -5.20         |      |               |
| 4ejr | -5.80         | 4ep2 | -5.10         |      |               |
| 2x9m | -5.80         | 3j23 | -5.00         |      |               |

**Table S6.** Predicted docking score of Velpatasvir against the viral protein panel.

| PDB  | Docking score | PDB  | Docking score | PDB  | Docking score |
|------|---------------|------|---------------|------|---------------|
| 4j4x | -13.00        | 4uo0 | -11.80        | 4uo0 | -11.50        |
| 4g42 | -12.90        | 4uo0 | -11.80        | 4bh0 | -11.50        |
| 3alz | -12.80        | 4unw | -11.80        | 3t3c | -11.50        |
| 2bvo | -12.60        | 4unw | -11.80        | 3ok9 | -11.50        |
| 3ztj | -12.40        | 4rw8 | -11.80        | 3h2l | -11.50        |
| 3fku | -12.40        | 4j4v | -11.80        | 3gsw | -11.50        |
| 1hhj | -12.40        | 4j4v | -11.80        | 3ciz | -11.50        |
| 4qru | -12.30        | 4j4v | -11.80        | 2wrg | -11.50        |
| 3koa | -12.30        | 4e78 | -11.80        | 2wre | -11.50        |
| 3bwa | -12.30        | 3r4b | -11.80        | 2i4u | -11.50        |
| 2hjk | -12.30        | 3gsw | -11.80        | 1izi | -11.50        |
| 2axg | -12.30        | 3gso | -11.80        | 4mkb | -11.40        |
| 1hhk | -12.30        | 3bw9 | -11.80        | 4mkb | -11.40        |
| 4uo5 | -12.20        | 2wr0 | -11.80        | 4mka | -11.40        |
| 4unw | -12.20        | 1hhi | -11.80        | 4mk8 | -11.40        |
| 4qru | -12.20        | 1hhh | -11.80        | 4k7f | -11.40        |
| 4qrs | -12.20        | 4uo7 | -11.70        | 3t3c | -11.40        |
| 2bvp | -12.20        | 4uo3 | -11.70        | 3rwc | -11.40        |
| 1syv | -12.20        | 4uo2 | -11.70        | 3gsq | -11.40        |
| 4uo7 | -12.10        | 4uo0 | -11.70        | 3ggg | -11.40        |
| 4uo5 | -12.10        | 4uo0 | -11.70        | 3cj2 | -11.40        |
| 3rwi | -12.10        | 4uo0 | -11.70        | 3bev | -11.40        |
| 3bwa | -12.10        | 4rw9 | -11.70        | 2wre | -11.40        |
| 4uo7 | -12.00        | 4j4v | -11.70        | 1izh | -11.40        |
| 4qrs | -12.00        | 4j4v | -11.70        | 4mka | -11.30        |
| 4o44 | -12.00        | 4e78 | -11.70        | 4mk8 | -11.30        |
| 4mk9 | -12.00        | 4e7a | -11.70        | 4j4y | -11.30        |
| 4mk9 | -12.00        | 4e7a | -11.70        | 4a92 | -11.30        |
| 3i6l | -12.00        | 3rwe | -11.70        | 4a92 | -11.30        |
| 2wrh | -12.00        | 3rwe | -11.70        | 3vcl | -11.30        |
| 2i4v | -12.00        | 3r4b | -11.70        | 3s11 | -11.30        |
| 4g9f | -11.90        | 3gsr | -11.70        | 3rwh | -11.30        |
| 3lkh | -11.90        | 4uo7 | -11.60        | 3rwh | -11.30        |
| 3lkh | -11.90        | 4uo3 | -11.60        | 3rwg | -11.30        |
| 3gso | -11.90        | 4uo2 | -11.60        | 3rwd | -11.30        |
| 3bw9 | -11.90        | 3vcl | -11.60        | 3h2l | -11.30        |
| 2wr1 | -11.90        | 3rwg | -11.60        | 2wre | -11.30        |
| 2wr1 | -11.90        | 3kqh | -11.60        | 2wr4 | -11.30        |
| 2wr1 | -11.90        | 2wrg | -11.60        | 2wr2 | -11.30        |
| 4uo7 | -11.80        | 2wrg | -11.60        | 2wr2 | -11.30        |
| 4uo7 | -11.80        | 2wrg | -11.60        | 2wa1 | -11.30        |
| 4uo0 | -11.80        | 2wrg | -11.60        | 4uo5 | -11.20        |
| 4uo0 | -11.80        | 4uo3 | -11.50        | 4uo2 | -11.20        |
| 4uo0 | -11.80        | 4uo3 | -11.50        | 4cqy | -11.20        |
| 4uo0 | -11.80        | 4uo3 | -11.50        | 3u82 | -11.20        |

| PDB  | Docking score | PDB  | Docking score | PDB  | Docking score |
|------|---------------|------|---------------|------|---------------|
| 3u82 | -11.20        | 2ygc | -10.80        | 2wre | -10.50        |
| 3rwc | -11.20        | 1quv | -10.80        | 2vww | -10.50        |
| 3ku6 | -11.20        | 1klm | -10.80        | 2vww | -10.50        |
| 3ggu | -11.20        | 4uo6 | -10.70        | 4uo3 | -10.40        |
| 3cj5 | -11.20        | 4uo2 | -10.70        | 4uo2 | -10.40        |
| 3ciz | -11.20        | 4pv9 | -10.70        | 4uo0 | -10.40        |
| 2wre | -11.20        | 4mk7 | -10.70        | 4uo0 | -10.40        |
| 2wr0 | -11.20        | 4i2p | -10.70        | 4uo0 | -10.40        |
| 2wr0 | -11.20        | 2wre | -10.70        | 4jo8 | -10.40        |
| 2i4x | -11.20        | 5ajm | -10.60        | 4j4r | -10.40        |
| 1ida | -11.20        | 5ajm | -10.60        | 4i7f | -10.40        |
| 4m8y | -11.10        | 5ajm | -10.60        | 4gag | -10.40        |
| 4k7f | -11.10        | 5ajm | -10.60        | 4gag | -10.40        |
| 4j4u | -11.10        | 4uo0 | -10.60        | 4fqi | -10.40        |
| 3ku6 | -11.10        | 4m8y | -10.60        | 4cqq | -10.40        |
| 3h98 | -11.10        | 4jkp | -10.60        | 4cey | -10.40        |
| 3cj5 | -11.10        | 4j4w | -10.60        | 3zpb | -10.40        |
| 3cj4 | -11.10        | 4g43 | -10.60        | 3zp6 | -10.40        |
| 3cj2 | -11.10        | 4cqz | -10.60        | 3zp3 | -10.40        |
| 2wr0 | -11.10        | 4cqr | -10.60        | 3zp2 | -10.40        |
| 2i4w | -11.10        | 4cqp | -10.60        | 3tie | -10.40        |
| 2i4d | -11.10        | 4cqp | -10.60        | 3tie | -10.40        |
| 1idb | -11.10        | 3zp1 | -10.60        | 3tid | -10.40        |
| 4mk7 | -11.00        | 3tid | -10.60        | 3ku3 | -10.40        |
| 4m8x | -11.00        | 3kqn | -10.60        | 3iyw | -10.40        |
| 4gua | -11.00        | 3cpl | -10.60        | 3iyw | -10.40        |
| 3u7s | -11.00        | 2wr7 | -10.60        | 3iyw | -10.40        |
| 3u7s | -11.00        | 5ajm | -10.50        | 3iyw | -10.40        |
| 3hkw | -11.00        | 5ajm | -10.50        | 3d23 | -10.40        |
| 3h98 | -11.00        | 4wm7 | -10.50        | 3d23 | -10.40        |
| 3cj4 | -11.00        | 4uo0 | -10.50        | 2ygb | -10.40        |
| 3cj3 | -11.00        | 4pg2 | -10.50        | 2wrf | -10.40        |
| 3cj0 | -11.00        | 4opa | -10.50        | 4uo0 | -10.30        |
| 2wr0 | -11.00        | 4jkp | -10.50        | 4uo0 | -10.30        |
| 4wm8 | -10.90        | 4cqz | -10.50        | 4qhk | -10.30        |
| 4uo6 | -10.90        | 4cqp | -10.50        | 4lsr | -10.30        |
| 3hky | -10.90        | 4cqp | -10.50        | 4j4s | -10.30        |
| 3hkw | -10.90        | 4cqp | -10.50        | 4gaj | -10.30        |
| 3gsq | -10.90        | 4cqp | -10.50        | 4gaj | -10.30        |
| 3cj3 | -10.90        | 4bgx | -10.50        | 4fnk | -10.30        |
| 3bew | -10.90        | 4bgx | -10.50        | 4f3z | -10.30        |
| 2ygc | -10.90        | 4bgw | -10.50        | 4ejl | -10.30        |
| 2wr2 | -10.90        | 4bgw | -10.50        | 4cqs | -10.30        |
| 4m8x | -10.80        | 3kqn | -10.50        | 4cqs | -10.30        |
| 4ejl | -10.80        | 3kqn | -10.50        | 4cqr | -10.30        |
| 3hky | -10.80        | 3iyw | -10.50        | 4cqq | -10.30        |
| 3hkw | -10.80        | 3iyw | -10.50        | 4cqq | -10.30        |
| 3cj0 | -10.80        | 3cpl | -10.50        | 4co6 | -10.30        |

| PDB  | Docking score | PDB  | Docking score | PDB  | Docking score |
|------|---------------|------|---------------|------|---------------|
| 4bgy | -10.30        | 3sdy | -9.90         | 2uv0 | -9.50         |
| 3zpa | -10.30        | 3rki | -9.90         | 2uv0 | -9.50         |
| 3s13 | -10.30        | 3nf8 | -9.90         | 2uv0 | -9.50         |
| 3mlh | -10.30        | 3kql | -9.90         | 2uv0 | -9.50         |
| 3ebj | -10.30        | 3d0g | -9.90         | 2uv0 | -9.50         |
| 2ygb | -10.30        | 1v3b | -9.90         | 2uv0 | -9.50         |
| 1p9u | -10.30        | 1v2i | -9.90         | 2uv0 | -9.50         |
| 1n5a | -10.30        | 1pk0 | -9.90         | 1v3b | -9.50         |
| 4uo3 | -10.20        | 4hkj | -9.80         | 4mg3 | -9.40         |
| 4uo3 | -10.20        | 4dag | -9.80         | 4kps | -9.40         |
| 4uo3 | -10.20        | 4cew | -9.80         | 4e76 | -9.40         |
| 4uo0 | -10.20        | 3nf8 | -9.80         | 4cdq | -9.40         |
| 4unx | -10.20        | 3nf8 | -9.80         | 3nf7 | -9.40         |
| 4unx | -10.20        | 3nf8 | -9.80         | 3nf6 | -9.40         |
| 4unx | -10.20        | 1r6a | -9.80         | 3ku5 | -9.40         |
| 4j4s | -10.20        | 4rw4 | -9.70         | 3ku5 | -9.40         |
| 4fqy | -10.20        | 4mmu | -9.70         | 2xra | -9.40         |
| 4fqy | -10.20        | 4lsv | -9.70         | 2uv0 | -9.40         |
| 4cqu | -10.20        | 4ej8 | -9.70         | 4i2q | -9.30         |
| 4cqu | -10.20        | 4cdw | -9.70         | 4e5l | -9.30         |
| 3zp0 | -10.20        | 3se8 | -9.70         | 4e5g | -9.30         |
| 2xwy | -10.20        | 3kql | -9.70         | 3uf5 | -9.30         |
| 1v2i | -10.20        | 3d0h | -9.70         | 3i6g | -9.30         |
| 4uo3 | -10.10        | 2x83 | -9.70         | 4q6r | -9.20         |
| 4unx | -10.10        | 1a41 | -9.70         | 4q6r | -9.20         |
| 4ej8 | -10.10        | 4o4g | -9.60         | 3nfa | -9.20         |
| 4cqu | -10.10        | 4mj1 | -9.60         | 3nfa | -9.20         |
| 3zpb | -10.10        | 4jb9 | -9.60         | 3mj5 | -9.20         |
| 3n0i | -10.10        | 4g9f | -9.60         | 2wrc | -9.20         |
| 2xi5 | -10.10        | 4ffz | -9.60         | 2mgu | -9.20         |
| 4uo2 | -10.00        | 4cr0 | -9.60         | 4fnk | -9.10         |
| 4pv9 | -10.00        | 4bgz | -9.60         | 4bh1 | -9.10         |
| 4i2p | -10.00        | 3se8 | -9.60         | 4bh1 | -9.10         |
| 4fqj | -10.00        | 3nf6 | -9.60         | 2xi5 | -9.10         |
| 4cqu | -10.00        | 2uv0 | -9.60         | 2htw | -9.10         |
| 4cqu | -10.00        | 4mgu | -9.50         | 1v3e | -9.10         |
| 4bac | -10.00        | 4fp8 | -9.50         | 1v3e | -9.10         |
| 3se9 | -10.00        | 4fp8 | -9.50         | 1rzj | -9.10         |
| 3sdy | -10.00        | 4cdx | -9.50         | 4rw7 | -9.00         |
| 3sdy | -10.00        | 4adf | -9.50         | 4qhl | -9.00         |
| 3kql | -10.00        | 3nf7 | -9.50         | 4g8g | -9.00         |
| 3b0w | -10.00        | 3nf7 | -9.50         | 4g8g | -9.00         |
| 2hcs | -10.00        | 3nf7 | -9.50         | 4bh1 | -9.00         |
| 4qhn | -9.90         | 3nf6 | -9.50         | 3nf9 | -9.00         |
| 4mj0 | -9.90         | 3nf6 | -9.50         | 3mj5 | -9.00         |
| 4cqW | -9.90         | 3ku3 | -9.50         | 3ava | -9.00         |
| 4cqu | -9.90         | 3avl | -9.50         | 2x83 | -9.00         |
| 4cdu | -9.90         | 2uv0 | -9.50         | 2wr3 | -9.00         |

| PDB  | Docking score | PDB       | Docking score | PDB      | Docking score |
|------|---------------|-----------|---------------|----------|---------------|
| 2hu4 | -9.00         | 2z35      | -8.50         | 1r6a     | -7.90         |
| 2hu0 | -9.00         | 2oy0      | -8.50         | 4i2q     | -7.80         |
| 4mza | -8.90         | 2hu4      | -8.50         | 4e92     | -7.80         |
| 3nf9 | -8.90         | 1rq9      | -8.50         | 4dkr     | -7.80         |
| 3nf9 | -8.90         | 4mds      | -8.40         | 4dko     | -7.80         |
| 3lqa | -8.90         | 4fqv      | -8.40         | 4adf     | -7.80         |
| 3alx | -8.90         | 3avn      | -8.40         | 4adf     | -7.80         |
| 2ghw | -8.90         | 3avj      | -8.40         | 2oy0     | -7.80         |
| 2gec | -8.90         | 3avc      | -8.40         | 4e92     | -7.70         |
| 1n59 | -8.90         | 2hu4      | -8.40         | 4bh4     | -7.70         |
| 4rw4 | -8.80         | 2gec      | -8.40         | 4bh4     | -7.70         |
| 4qru | -8.80         | 1b53      | -8.40         | 2ge8     | -7.70         |
| 4oyd | -8.80         | 4mds      | -8.30         | 2bvq     | -7.70         |
| 4mza | -8.80         | 4f3i      | -8.30         | 2axf     | -7.70         |
| 4mg3 | -8.80         | 4e5j      | -8.30         | 4mmt     | -7.60         |
| 4fvu | -8.80         | 1v3d      | -8.30         | 4mj1     | -7.60         |
| 3nf9 | -8.80         | 1v3c      | -8.30         | 4kpq     | -7.60         |
| 2vvx | -8.80         | 4lsp      | -8.20         | 3o4l     | -7.60         |
| 2vvx | -8.80         | 4fqv      | -8.20         | 3nxu     | -7.60         |
| 2hty | -8.80         | 3kna      | -8.20         | 3klv     | -7.60         |
| 2ghv | -8.80         | 2htu      | -8.20         | 3gsw     | -7.60         |
| 1b50 | -8.80         | 2hcn      | -8.20         | 3avh     | -7.60         |
| 4pv9 | -8.70         | 4mms      | -8.10         | 3avb     | -7.60         |
| 4mj0 | -8.70         | 4m30      | -8.10         | 3ava     | -7.60         |
| 4gzf | -8.70         | 4lss      | -8.10         | 3ava     | -7.60         |
| 4e5f | -8.70         | 4g9z      | -8.10         | 2yka     | -7.60         |
| 4e5e | -8.70         | 4f3i      | -8.10         | 2axf     | -7.60         |
| 3rwi | -8.70         | 3ztn      | -8.10         | Papain   | -7.50         |
| 3n0i | -8.70         | 3vbr      | -8.10         | protease | -7.50         |
| 3ava | -8.70         | 3ro5      | -8.10         | 4qrt     | -7.50         |
| 2zu1 | -8.70         | 2gvf      | -8.10         | 4g9z     | -7.50         |
| 2uv0 | -8.70         | 4lkj      | -8.00         | 4bh2     | -7.50         |
| 2uv0 | -8.70         | 4j6r      | -8.00         | 3rwf     | -7.50         |
| 2iph | -8.70         | 4adf      | -8.00         | 3gsv     | -7.50         |
| 2iph | -8.70         | 3avl      | -8.00         | 2zu5     | -7.50         |
| 4rw6 | -8.60         | 1v3d      | -8.00         | 1sys     | -7.50         |
| 4pv8 | -8.60         | Spike RBD | -7.90         | 1qz8     | -7.50         |
| 4gzf | -8.60         | Main      | -7.90         | 4gv3     | -7.40         |
| 2iph | -8.60         | protease  | -7.90         | 3avk     | -7.40         |
| 2iph | -8.60         | 4e91      | -7.90         | 3avb     | -7.40         |
| 2hu4 | -8.60         | 4dkq      | -7.90         | 3avb     | -7.40         |
| 1v3c | -8.60         | 4dkp      | -7.90         | 2c7u     | -7.40         |
| 1v3c | -8.60         | 4dgb      | -7.90         | 4qrt     | -7.30         |
| 1v3c | -8.60         | 4adf      | -7.90         | 4mze     | -7.30         |
| 4pv8 | -8.50         | 3rwj      | -7.90         | 4dgd     | -7.30         |
| 4adf | -8.50         | 3rwj      | -7.90         | 3rwf     | -7.30         |
| 3nfa | -8.50         | 3avg      | -7.90         | 4e5i     | -7.20         |
| 3nfa | -8.50         | 3avb      | -7.90         | 3su1     | -7.20         |

| PDB  | Docking score | PDB  | Docking score | PDB  | Docking score |
|------|---------------|------|---------------|------|---------------|
| 3kmq | -7.20         | 3su2 | -6.60         | 3sud | -5.70         |
| 3gsx | -7.20         | 3su0 | -6.60         | 3su1 | -5.70         |
| 3avh | -7.20         | 3alw | -6.60         | 3avf | -5.70         |
| 2zty | -7.20         | 2yol | -6.60         | 4u6h | -5.60         |
| 2lsp | -7.20         | 2ht5 | -6.60         | 4lst | -5.60         |
| 4i33 | -7.10         | 2g69 | -6.60         | 4fqi | -5.60         |
| 4fb3 | -7.10         | 4dmn | -6.50         | 4ekx | -5.60         |
| 4dgd | -7.10         | 3sv8 | -6.50         | 3su5 | -5.60         |
| 4bh3 | -7.10         | 3gsu | -6.50         | 2x9m | -5.60         |
| 4bh2 | -7.10         | 2yol | -6.50         | 2q5u | -5.60         |
| 3vbh | -7.10         | 2wh6 | -6.50         | 2q5u | -5.60         |
| 3su4 | -7.10         | 1p9s | -6.50         | 2q5u | -5.60         |
| 3su4 | -7.10         | 4ejr | -6.40         | 2q5u | -5.60         |
| 2ztz | -7.10         | 4dmn | -6.40         | 2q5u | -5.60         |
| 2vxw | -7.10         | 4b4n | -6.40         | 4nwl | -5.50         |
| 4qrt | -7.00         | 3su6 | -6.40         | 3sv9 | -5.50         |
| 4bh3 | -7.00         | 3su2 | -6.40         | 2v6q | -5.50         |
| 3vbo | -7.00         | 3pqy | -6.40         | 2q7c | -5.50         |
| 3s12 | -7.00         | 4dgc | -6.30         | 4mmv | -5.40         |
| 3oah | -7.00         | 4dgc | -6.30         | 4eq0 | -5.40         |
| 3gsv | -7.00         | 4b4n | -6.20         | 3p8o | -5.40         |
| 1rpi | -7.00         | 3su3 | -6.20         | 2q7c | -5.40         |
| 4gv3 | -6.90         | 3gsr | -6.20         | 3vie | -5.30         |
| 4dgb | -6.90         | 1rpi | -6.20         | 3sv7 | -5.30         |
| 4bh3 | -6.90         | 4bh4 | -6.10         | 3sue | -5.30         |
| 4bh3 | -6.90         | 2q7c | -6.10         | 3giv | -5.30         |
| 3w39 | -6.90         | 4i32 | -6.00         | 2xpx | -5.30         |
| 3nwf | -6.90         | 4gye | -6.00         | 4i31 | -5.20         |
| 3m5h | -6.90         | 4gv9 | -6.00         | 3sv6 | -5.20         |
| 3gsx | -6.90         | 4dgc | -6.00         | 3sv6 | -5.20         |
| 3gsu | -6.90         | 4dgc | -6.00         | 3b71 | -5.20         |
| 2zol | -6.90         | 4dgc | -6.00         | 2xpx | -5.20         |
| 2wh6 | -6.90         | 3vbf | -6.00         | 4b8e | -5.10         |
| 2ca1 | -6.90         | 3b71 | -6.00         | 3sud | -5.10         |
| 2c3a | -6.90         | 3avj | -6.00         | 3su3 | -5.10         |
| 1sk7 | -6.90         | 2zu4 | -6.00         | 3d0i | -5.10         |
| 1f08 | -6.90         | 4mmr | -5.90         | 4nwk | -5.00         |
| 4jpi | -6.80         | 4bh4 | -5.90         | 4cqx | -5.00         |
| 3v3m | -6.80         | 3su5 | -5.90         | 4b8e | -5.00         |
| 3v3m | -6.80         | 3su5 | -5.90         | 3sv9 | -5.00         |
| 3su2 | -6.80         | 2q7c | -5.90         | 3sug | -5.00         |
| 3nwa | -6.80         | 4oyd | -5.80         | 3sug | -5.00         |
| 3nwa | -6.80         | 4fqi | -5.80         | 3p8n | -5.00         |
| 2ge7 | -6.80         | 4ejd | -5.80         | 3ifu | -5.00         |
| 4mze | -6.70         | 3vbf | -5.80         | 3i6k | -5.00         |
| 4jpk | -6.70         | 3gzf | -5.80         | 1rv7 | -5.00         |
| 2xya | -6.70         | 2q7c | -5.80         | 4nwk | -4.90         |
| 2g69 | -6.70         | 4dgc | -5.70         | 4ipz | -4.90         |



| PDB  | Docking score | PDB  | Docking score | PDB  | Docking score |
|------|---------------|------|---------------|------|---------------|
| 4i31 | -4.90         | 4ep3 | -4.20         | 4ejd | -2.90         |
| 4adq | -4.90         | 3su6 | -4.20         | 4uo8 | -2.50         |
| 3suf | -4.90         | 4ep3 | -4.10         | 4qhm | -2.40         |
| 3nw8 | -4.90         | 3kms | -4.10         | 2vvy | -2.40         |
| 3kqk | -4.90         | 3gsn | -4.10         | 3su0 | -2.30         |
| 2q7c | -4.90         | 4b8e | -4.00         | 2wfo | -2.30         |
| 2q5u | -4.90         | 2yhf | -4.00         | 4egt | -2.00         |
| 4lsu | -4.80         | 2c36 | -4.00         | 3vtt | -1.80         |
| 4ipz | -4.80         | 1zsd | -4.00         | 4oph | -1.60         |
| 4gve | -4.80         | 2xze | -3.80         | 3sis | -1.50         |
| 4adq | -4.80         | 2vxj | -3.80         | 4ipz | -1.20         |
| 3sv7 | -4.80         | 2c36 | -3.80         | 4ipz | -1.20         |
| 2mkr | -4.80         | 4g8i | -3.70         | 4dge | -1.10         |
| 4ejd | -4.70         | 4dga | -3.60         | 4ipz | -0.90         |
| 4ejd | -4.70         | 3j23 | -3.60         | 3m5i | -0.90         |
| 4ffy | -4.60         | 3j22 | -3.60         | 2zsv | -0.80         |
| 2wfo | -4.60         | 3avk | -3.60         | 2zsv | -0.80         |
| 2m3l | -4.60         | 4dga | -3.50         | 4ipz | -0.50         |
| 4eq0 | -4.50         | 4eee | -3.40         | 4fqr | -0.50         |
| 3u83 | -4.50         | 3bwa | -3.40         | 4e0r | -0.40         |
| 3u83 | -4.50         | 4iv3 | -3.20         | 4cqy | -0.30         |
| 1z8r | -4.50         | 3uqi | -3.20         | 4fqr | -0.20         |
| 4g8i | -4.40         | 2zu3 | -3.20         |      |               |
| 2c86 | -4.30         | 4lsu | -3.00         |      |               |

**Table S7.** Predicted docking score of Lomitapide against the viral protein panel.

| <b>PDB</b> | <b>Docking score</b> | <b>PDB</b> | <b>Docking score</b> | <b>PDB</b> | <b>Docking score</b> |
|------------|----------------------|------------|----------------------|------------|----------------------|
| 3fku       | -12.70               | 2axg       | -11.30               | 3se9       | -11.00               |
| 3nxu       | -12.40               | 4q6r       | -11.20               | 3kqn       | -11.00               |
| 3s11       | -12.10               | 4mk9       | -11.20               | 3kqn       | -11.00               |
| 3b0w       | -12.10               | 4j4w       | -11.20               | 3kqh       | -11.00               |
| 2wrg       | -12.10               | 4i2p       | -11.20               | 3h98       | -11.00               |
| 3ztj       | -12.00               | 4gua       | -11.20               | 3h98       | -11.00               |
| 2wrg       | -12.00               | 4fqr       | -11.20               | 3d23       | -11.00               |
| 4wm8       | -11.90               | 4fqr       | -11.20               | 3cj2       | -11.00               |
| 3t3c       | -11.90               | 4fnk       | -11.20               | 1ida       | -11.00               |
| 2wrg       | -11.90               | 3t3c       | -11.20               | 4uo7       | -10.90               |
| 2wrg       | -11.90               | 3iyw       | -11.20               | 4uo2       | -10.90               |
| 4wm7       | -11.80               | 3iyw       | -11.20               | 4uo2       | -10.90               |
| 2wrg       | -11.80               | 3iyw       | -11.20               | 4lsv       | -10.90               |
| 2hcs       | -11.80               | 3cj0       | -11.20               | 4k7f       | -10.90               |
| 4i2p       | -11.70               | 4uo3       | -11.10               | 3n0i       | -10.90               |
| 4o4g       | -11.60               | 4unx       | -11.10               | 3kqn       | -10.90               |
| 4g42       | -11.60               | 4qrs       | -11.10               | 3ggg       | -10.90               |
| 3rwg       | -11.60               | 4mkb       | -11.10               | 3ciz       | -10.90               |
| 4uo3       | -11.50               | 4mka       | -11.10               | 3bwa       | -10.90               |
| 4e5l       | -11.50               | 4mka       | -11.10               | 3bw9       | -10.90               |
| 4bac       | -11.50               | 4i2q       | -11.10               | 2i4x       | -10.90               |
| 3rwg       | -11.50               | 4dag       | -11.10               | 2i4v       | -10.90               |
| 3cj3       | -11.50               | 4cqy       | -11.10               | 4uo3       | -10.80               |
| 2bvp       | -11.50               | 3vcl       | -11.10               | 4o44       | -10.80               |
| 2bvo       | -11.50               | 3u7s       | -11.10               | 3vcl       | -10.80               |
| 4rw4       | -11.40               | 3u7s       | -11.10               | 3lkh       | -10.80               |
| 4mk8       | -11.40               | 3kql       | -11.10               | 3gso       | -10.80               |
| 4j4u       | -11.40               | 3kql       | -11.10               | 3ciz       | -10.80               |
| 4f3z       | -11.40               | 3kql       | -11.10               | 3bwa       | -10.80               |
| 4e91       | -11.40               | 3iyw       | -11.10               | 3bw9       | -10.80               |
| 3cj5       | -11.40               | 3iyw       | -11.10               | 2wre       | -10.80               |
| 2hu4       | -11.40               | 3gsq       | -11.10               | 2i4w       | -10.80               |
| 2hu4       | -11.40               | 3d23       | -11.10               | 1syv       | -10.80               |
| 2hu4       | -11.40               | 3cj5       | -11.10               | 1r6a       | -10.80               |
| 4uo3       | -11.30               | 3cj2       | -11.10               | 1hhj       | -10.80               |
| 4rw4       | -11.30               | 4unx       | -11.00               | 4uo3       | -10.70               |
| 4j4s       | -11.30               | 4unx       | -11.00               | 4pv9       | -10.70               |
| 4e5e       | -11.30               | 4unx       | -11.00               | 4m30       | -10.70               |
| 3iyw       | -11.30               | 4unw       | -11.00               | 4lkj       | -10.70               |
| 3i6l       | -11.30               | 4unw       | -11.00               | 4j4x       | -10.70               |
| 3hkw       | -11.30               | 4rw8       | -11.00               | 3koa       | -10.70               |
| 3h2l       | -11.30               | 4qrs       | -11.00               | 3gsr       | -10.70               |
| 3h2l       | -11.30               | 4q6r       | -11.00               | 3gsq       | -10.70               |
| 3cj3       | -11.30               | 4j4s       | -11.00               | 3cj4       | -10.70               |
| 2hu4       | -11.30               | 4g9f       | -11.00               | 3cj4       | -10.70               |
| 2hjk       | -11.30               | 4bh0       | -11.00               | 3bew       | -10.70               |

| PDB  | Docking score | PDB  | Docking score | PDB  | Docking score |
|------|---------------|------|---------------|------|---------------|
| 2wre | -10.70        | 3hkw | -10.40        | 3tid | -10.10        |
| 1p9u | -10.70        | 3gso | -10.40        | 3tid | -10.10        |
| 1klm | -10.70        | 3ggu | -10.40        | 3rwe | -10.10        |
| 1izh | -10.70        | 2wr3 | -10.40        | 3bev | -10.10        |
| 4uo3 | -10.60        | 2vww | -10.40        | 2wrc | -10.10        |
| 4uo3 | -10.60        | 4uo0 | -10.30        | 1pk0 | -10.10        |
| 4uo3 | -10.60        | 4uo0 | -10.30        | 1idb | -10.10        |
| 4mk7 | -10.60        | 4uo0 | -10.30        | 4mze | -10.00        |
| 4k7f | -10.60        | 4uo0 | -10.30        | 4mmr | -10.00        |
| 4j4v | -10.60        | 4rw9 | -10.30        | 4mk9 | -10.00        |
| 4fnk | -10.60        | 4mg3 | -10.30        | 4mk8 | -10.00        |
| 4e7a | -10.60        | 4m8x | -10.30        | 4mgu | -10.00        |
| 4cew | -10.60        | 4lsu | -10.30        | 4jkp | -10.00        |
| 4adf | -10.60        | 4lsu | -10.30        | 4i7f | -10.00        |
| 3rwh | -10.60        | 4g9z | -10.30        | 4fqj | -10.00        |
| 3rwc | -10.60        | 4ejl | -10.30        | 4cdu | -10.00        |
| 3kna | -10.60        | 4e5j | -10.30        | 4cdq | -10.00        |
| 3hky | -10.60        | 4adf | -10.30        | 4bh2 | -10.00        |
| 3hky | -10.60        | 4adf | -10.30        | 4a92 | -10.00        |
| 3cj0 | -10.60        | 4adf | -10.30        | 1izi | -10.00        |
| 3alx | -10.60        | 2wrf | -10.30        | 4uo7 | -9.90         |
| 4rw7 | -10.50        | 2wre | -10.30        | 4uo2 | -9.90         |
| 4mk7 | -10.50        | 2wre | -10.30        | 4uo0 | -9.90         |
| 4j4v | -10.50        | 2i4u | -10.30        | 4uo0 | -9.90         |
| 4j4v | -10.50        | 4uo2 | -10.20        | 4uo0 | -9.90         |
| 4j4v | -10.50        | 4uo0 | -10.20        | 4uo0 | -9.90         |
| 4ej8 | -10.50        | 4uo0 | -10.20        | 4rw6 | -9.90         |
| 4e7a | -10.50        | 4uo0 | -10.20        | 4m8y | -9.90         |
| 4cey | -10.50        | 4uo0 | -10.20        | 4jkp | -9.90         |
| 3rwh | -10.50        | 4uo0 | -10.20        | 4g9z | -9.90         |
| 3rwd | -10.50        | 4mkb | -10.20        | 4fqj | -9.90         |
| 3rwc | -10.50        | 4jo8 | -10.20        | 4cr0 | -9.90         |
| 3r4b | -10.50        | 4j4v | -10.20        | 4bh2 | -9.90         |
| 2i4d | -10.50        | 4hkj | -10.20        | 3zp2 | -9.90         |
| 2hty | -10.50        | 4g43 | -10.20        | 3cpl | -9.90         |
| 4uo8 | -10.40        | 3vbo | -10.20        | 2ygc | -9.90         |
| 4uo0 | -10.40        | 3rki | -10.20        | 2ht5 | -9.90         |
| 4j6r | -10.40        | 2wre | -10.20        | 1v3d | -9.90         |
| 4j4y | -10.40        | 2wre | -10.20        | 1rzj | -9.90         |
| 4i2q | -10.40        | 2vww | -10.20        | 1n5a | -9.90         |
| 4ej8 | -10.40        | 4uo3 | -10.10        | 4uo7 | -9.80         |
| 4adf | -10.40        | 4uo3 | -10.10        | 4uo7 | -9.80         |
| 4adf | -10.40        | 4uo2 | -10.10        | 4unw | -9.80         |
| 3vbr | -10.40        | 4uo2 | -10.10        | 4qhn | -9.80         |
| 3rwe | -10.40        | 4uny | -10.10        | 4pv9 | -9.80         |
| 3r4b | -10.40        | 4pv9 | -10.10        | 4pg2 | -9.80         |
| 3ok9 | -10.40        | 4mze | -10.10        | 4mza | -9.80         |
| 3n0i | -10.40        | 4ejl | -10.10        | 4m8x | -9.80         |

| PDB  | Docking score | PDB       | Docking score | PDB  | Docking score |
|------|---------------|-----------|---------------|------|---------------|
| 4lsr | -9.80         | 4cqy      | -9.50         | 2vvx | -9.30         |
| 4e5f | -9.80         | 4cdw      | -9.50         | 2vvx | -9.30         |
| 3tie | -9.80         | 3zp6      | -9.50         | 2htw | -9.30         |
| 3ebj | -9.80         | 3zp0      | -9.50         | 4qru | -9.20         |
| 3cpl | -9.80         | 3u82      | -9.50         | 4gag | -9.20         |
| 3avg | -9.80         | 3lqa      | -9.50         | 4bh4 | -9.20         |
| 2wrh | -9.80         | 3i6g      | -9.50         | 3nf9 | -9.20         |
| 2wr0 | -9.80         | 3gsw      | -9.50         | 3nf8 | -9.20         |
| 1v3d | -9.80         | 3d0h      | -9.50         | 3nf8 | -9.20         |
| 1hhi | -9.80         | 3avn      | -9.50         | 3nf6 | -9.20         |
| 4uo0 | -9.70         | 3ava      | -9.50         | 3nf6 | -9.20         |
| 4mza | -9.70         | 3ava      | -9.50         | 3alz | -9.20         |
| 4mds | -9.70         | 2xi5      | -9.50         | 2z35 | -9.20         |
| 4mds | -9.70         | 2wr2      | -9.50         | 2xwy | -9.20         |
| 4fvu | -9.70         | 2wr0      | -9.50         | 2wr2 | -9.20         |
| 4e5g | -9.70         | 2wr0      | -9.50         | 2wr0 | -9.20         |
| 4a92 | -9.70         | 2iph      | -9.50         | 2wa1 | -9.20         |
| 3u82 | -9.70         | 2iph      | -9.50         | 2htu | -9.20         |
| 3tie | -9.70         | 2iph      | -9.50         | 1v2i | -9.20         |
| 3lkh | -9.70         | 2gec      | -9.50         | 1v2i | -9.20         |
| 3avh | -9.70         | 1b53      | -9.50         | 1sk7 | -9.20         |
| 2ygc | -9.70         | 4qrt      | -9.40         | 1hbk | -9.20         |
| 2ygb | -9.70         | 4cdx      | -9.40         | 4uo5 | -9.10         |
| 2ygb | -9.70         | 4bh3      | -9.40         | 4uo5 | -9.10         |
| 2xra | -9.70         | 4bh3      | -9.40         | 4lst | -9.10         |
| 2wr0 | -9.70         | 3rwi      | -9.40         | 4iv3 | -9.10         |
| 4uo0 | -9.60         | 3oah      | -9.40         | 4gaj | -9.10         |
| 4uo0 | -9.60         | 3nf9      | -9.40         | 4g8g | -9.10         |
| 4mms | -9.60         | 3nf7      | -9.40         | 4e5i | -9.10         |
| 4g8g | -9.60         | 3gsv      | -9.40         | 4bh4 | -9.10         |
| 4fqv | -9.60         | 3avl      | -9.40         | 3zpb | -9.10         |
| 4fqv | -9.60         | 3avj      | -9.40         | 3se8 | -9.10         |
| 4cqx | -9.60         | 3avh      | -9.40         | 3klv | -9.10         |
| 4bh4 | -9.60         | 3ava      | -9.40         | 2bvq | -9.10         |
| 3hkw | -9.60         | 2gec      | -9.40         | 1quv | -9.10         |
| 3gsw | -9.60         | 1hhh      | -9.40         | 5ajm | -9.00         |
| 2wr7 | -9.60         | Spike RBD | -9.30         | 4qru | -9.00         |
| 2wr4 | -9.60         | 4uo6      | -9.30         | 4qhl | -9.00         |
| 2iph | -9.60         | 4uo5      | -9.30         | 4gaj | -9.00         |
| 2hu0 | -9.60         | 4g9f      | -9.30         | 4cqq | -9.00         |
| 4uo7 | -9.50         | 4cqw      | -9.30         | 4bh4 | -9.00         |
| 4uo7 | -9.50         | 4bh3      | -9.30         | 3v3m | -9.00         |
| 4uo6 | -9.50         | 4bh3      | -9.30         | 3nf9 | -9.00         |
| 4opa | -9.50         | 3se8      | -9.30         | 3mlh | -9.00         |
| 4m8y | -9.50         | 3sdy      | -9.30         | 3avl | -9.00         |
| 4e78 | -9.50         | 3nf7      | -9.30         | 3ava | -9.00         |
| 4e78 | -9.50         | 3avb      | -9.30         | 1sys | -9.00         |
| 4dgd | -9.50         | 2x83      | -9.30         | 1a41 | -9.00         |

| PDB           | Docking score | PDB  | Docking score | PDB  | Docking score |
|---------------|---------------|------|---------------|------|---------------|
| 4qru          | -8.90         | 2uv0 | -8.70         | 4gye | -8.30         |
| 4mj0          | -8.90         | 2uv0 | -8.70         | 4gve | -8.30         |
| 4gv3          | -8.90         | 2axf | -8.70         | 4bgy | -8.30         |
| 4f3i          | -8.90         | 4mmv | -8.60         | 4bgw | -8.30         |
| 3zp3          | -8.90         | 4gv3 | -8.60         | 4bgw | -8.30         |
| 3vbh          | -8.90         | 4fqy | -8.60         | 3su6 | -8.30         |
| 3sv8          | -8.90         | 4f3i | -8.60         | 3su2 | -8.30         |
| 3su1          | -8.90         | 4cqs | -8.60         | 3sdy | -8.30         |
| 3s13          | -8.90         | 4cqr | -8.60         | 3rwf | -8.30         |
| 3avf          | -8.90         | 3nf9 | -8.60         | 3rwf | -8.30         |
| 3avb          | -8.90         | 3nf7 | -8.60         | 3nw8 | -8.30         |
| 2wr2          | -8.90         | 2xi5 | -8.60         | 3avc | -8.30         |
| 2ghw          | -8.90         | 2wr1 | -8.60         | 2yol | -8.30         |
| 2ge8          | -8.90         | 2c7u | -8.60         | 2oy0 | -8.30         |
| 1v3b          | -8.90         | 2axf | -8.60         | 1v3c | -8.30         |
| Main protease | -8.80         | 1n59 | -8.60         | 1v3c | -8.30         |
| 4oph          | -8.80         | 4mj1 | -8.50         | 4mg3 | -8.20         |
| 4jb9          | -8.80         | 4mj1 | -8.50         | 4kps | -8.20         |
| 4ffz          | -8.80         | 4kpq | -8.50         | 4fqy | -8.20         |
| 4bh1          | -8.80         | 4gag | -8.50         | 4fp8 | -8.20         |
| 3ro5          | -8.80         | 4fqi | -8.50         | 4cqu | -8.20         |
| 3nfa          | -8.80         | 4cqs | -8.50         | 4cqu | -8.20         |
| 3d0g          | -8.80         | 4co6 | -8.50         | 3zp1 | -8.20         |
| 2wr1          | -8.80         | 3nf7 | -8.50         | 3uf5 | -8.20         |
| 2uv0          | -8.80         | 3ku6 | -8.50         | 3suf | -8.20         |
| 2uv0          | -8.80         | 3avk | -8.50         | 3su2 | -8.20         |
| 2uv0          | -8.80         | 1v3b | -8.50         | 3su0 | -8.20         |
| 2uv0          | -8.80         | 1rq9 | -8.50         | 3ku3 | -8.20         |
| 2uv0          | -8.80         | 1p9s | -8.50         | 3ku3 | -8.20         |
| 2uv0          | -8.80         | 5ajm | -8.40         | 2zu4 | -8.20         |
| 2uv0          | -8.80         | 4uo0 | -8.40         | 2ztz | -8.20         |
| 2uv0          | -8.80         | 4qhk | -8.40         | 2ge7 | -8.20         |
| 2uv0          | -8.80         | 4pv8 | -8.40         | 4qrt | -8.10         |
| 2uv0          | -8.80         | 4oyd | -8.40         | 4pv8 | -8.10         |
| 2uv0          | -8.80         | 4mj0 | -8.40         | 4dko | -8.10         |
| 1b50          | -8.80         | 4fb3 | -8.40         | 4bgx | -8.10         |
| 4j4r          | -8.70         | 4cqu | -8.40         | 3zpb | -8.10         |
| 4fqi          | -8.70         | 4cqq | -8.40         | 3v3m | -8.10         |
| 4cqu          | -8.70         | 3ztn | -8.40         | 3sud | -8.10         |
| 4cqr          | -8.70         | 3sdy | -8.40         | 3o4l | -8.10         |
| 3nwa          | -8.70         | 3rwi | -8.40         | 3nf8 | -8.10         |
| 3nwa          | -8.70         | 3ku6 | -8.40         | 3nf6 | -8.10         |
| 3nfa          | -8.70         | 2yol | -8.40         | 3nf6 | -8.10         |
| 3mj5          | -8.70         | 2mgu | -8.40         | 3gsv | -8.10         |
| 3alw          | -8.70         | 1r6a | -8.40         | 2xze | -8.10         |
| 2zu5          | -8.70         | 4uo4 | -8.30         | 2x83 | -8.10         |
| 2wr1          | -8.70         | 4i32 | -8.30         | 2hcn | -8.10         |
| 2wh6          | -8.70         | 4i31 | -8.30         | 5ajm | -8.00         |

| PDB  | Docking score | PDB  | Docking score | PDB  | Docking score |
|------|---------------|------|---------------|------|---------------|
| 5ajm | -8.00         | 4eq0 | -7.80         | 3kms | -7.50         |
| 5ajm | -8.00         | 4e92 | -7.80         | 3ifu | -7.50         |
| 5ajm | -8.00         | 4dgd | -7.80         | 3gsu | -7.50         |
| 4jpk | -8.00         | 4dgc | -7.80         | 2q7c | -7.50         |
| 4iv1 | -8.00         | 4dgc | -7.80         | 2q7c | -7.50         |
| 4gzf | -8.00         | 4dgc | -7.80         | 2q5u | -7.50         |
| 4gzf | -8.00         | 4dgb | -7.80         | 4dgc | -7.40         |
| 4fp8 | -8.00         | 4cqu | -7.80         | 3sv9 | -7.40         |
| 4dkp | -8.00         | 4bh1 | -7.80         | 3sit | -7.40         |
| 4cqz | -8.00         | 4bgz | -7.80         | 3gsr | -7.40         |
| 4cqz | -8.00         | 4bgx | -7.80         | 3avg | -7.40         |
| 4cqq | -8.00         | 4b8e | -7.80         | 1v3c | -7.40         |
| 4cqp | -8.00         | 3uqi | -7.80         | 1qr9 | -7.40         |
| 4cqp | -8.00         | 3sv7 | -7.80         | 1oop | -7.40         |
| 4cqp | -8.00         | 3sue | -7.80         | 4ekx | -7.30         |
| 4cqp | -8.00         | 3rwj | -7.80         | 3sv6 | -7.30         |
| 3vbf | -8.00         | 3rwj | -7.80         | 3sv6 | -7.30         |
| 3nwf | -8.00         | 3nf8 | -7.80         | 3su3 | -7.30         |
| 3nfa | -8.00         | 2q5u | -7.80         | 3sit | -7.30         |
| 3nfa | -8.00         | 4cqu | -7.70         | 3sit | -7.30         |
| 3ku5 | -8.00         | 3mj5 | -7.70         | 2vvy | -7.30         |
| 2xze | -8.00         | 3gsx | -7.70         | 2q7c | -7.30         |
| 2oy0 | -8.00         | 3avb | -7.70         | 2c86 | -7.30         |
| 2ghv | -8.00         | 2q5u | -7.70         | 4lss | -7.20         |
| 2c36 | -8.00         | 1v3e | -7.70         | 4dgb | -7.20         |
| 1rv7 | -8.00         | 1v3e | -7.70         | 3sis | -7.20         |
| 4qrt | -7.90         | 4u6h | -7.60         | 3m5h | -7.20         |
| 4mmu | -7.90         | 4eq0 | -7.60         | 2q5u | -7.20         |
| 4mmt | -7.90         | 4ep3 | -7.60         | 2ca1 | -7.20         |
| 4lsp | -7.90         | 4egt | -7.60         | 4ejd | -7.10         |
| 4ep3 | -7.90         | 4b8e | -7.60         | 3su2 | -7.10         |
| 4e76 | -7.90         | 4b8e | -7.60         | 3gzf | -7.10         |
| 4dkq | -7.90         | 3sud | -7.60         | 3bwa | -7.10         |
| 4dgc | -7.90         | 3p8o | -7.60         | 2vxw | -7.10         |
| 4cqp | -7.90         | 3kmq | -7.60         | 2q7c | -7.10         |
| 4cqp | -7.90         | 3d0i | -7.60         | 2gvf | -7.10         |
| 4bh1 | -7.90         | 3avb | -7.60         | 4gv9 | -7.00         |
| 3zpa | -7.90         | 2zu1 | -7.60         | 4ejd | -7.00         |
| 3uqi | -7.90         | 2q7c | -7.60         | 4e92 | -7.00         |
| 3su6 | -7.90         | 1rpi | -7.60         | 3w39 | -7.00         |
| 3ku5 | -7.90         | 1f08 | -7.60         | 3sit | -7.00         |
| 3gsx | -7.90         | 4i31 | -7.50         | 3pqy | -7.00         |
| 3gsu | -7.90         | 4gye | -7.50         | 3avk | -7.00         |
| 2zol | -7.90         | 4dgc | -7.50         | 3a07 | -7.00         |
| 2q5u | -7.90         | 3vbf | -7.50         | 2zty | -7.00         |
| 2q5u | -7.90         | 3sv9 | -7.50         | 2yhh | -7.00         |
| 2c36 | -7.90         | 3su3 | -7.50         | 2c3a | -7.00         |
| 1v3c | -7.90         | 3su0 | -7.50         |      |               |

| PDB      | Docking score | PDB  | Docking score | PDB  | Docking score |
|----------|---------------|------|---------------|------|---------------|
| Papain   | -6.90         | 4ejk | -6.40         | 1qr8 | -5.40         |
| protease | -6.90         | 4ejd | -6.40         | 4ejr | -5.30         |
| 4c1w     | -6.90         | 4ejd | -6.40         | 3i6k | -5.20         |
| 3su5     | -6.90         | 3u83 | -6.40         | 3vtt | -5.10         |
| 3sis     | -6.90         | 3u83 | -6.40         | 3giv | -5.10         |
| 2yka     | -6.90         | 3su5 | -6.40         | 2x9m | -5.00         |
| 2xpx     | -6.90         | 3p8n | -6.40         | 2vxj | -5.00         |
| 1rpi     | -6.90         | 2y1s | -6.40         | 2l3h | -5.00         |
| 4oyd     | -6.80         | 2wh6 | -6.40         | 4ipz | -4.90         |
| 4nwk     | -6.80         | 2mkr | -6.40         | 4ipz | -4.80         |
| 4jpi     | -6.80         | 2m3l | -6.40         | 4ipz | -4.80         |
| 4ipz     | -6.80         | 2lsp | -6.40         | 4adq | -4.80         |
| 4ejd     | -6.80         | 4g8i | -6.30         | 4adq | -4.80         |
| 4ejd     | -6.80         | 4dga | -6.30         | 2hfz | -4.80         |
| 4eee     | -6.80         | 4dga | -6.30         | 4ipz | -4.70         |
| 4dkr     | -6.80         | 3avc | -6.30         | 3vtt | -4.70         |
| 3sv7     | -6.80         | 2wfo | -6.30         | 2me3 | -4.70         |
| 3rkc     | -6.80         | 2me2 | -6.30         | 3kqk | -4.60         |
| 3b71     | -6.80         | 4ipz | -6.20         | 4ipz | -4.50         |
| 3b71     | -6.80         | 3su4 | -6.20         | 4ipz | -4.40         |
| 3vie     | -6.70         | 3su4 | -6.20         | 4ep2 | -4.30         |
| 3sit     | -6.70         | 3sit | -6.20         | 4lki | -4.10         |
| 1z8r     | -6.70         | 2wfo | -6.20         | 4lkh | -4.10         |
| 4nwl     | -6.60         | 2g69 | -6.20         | 3j23 | -4.10         |
| 4ffy     | -6.60         | 4ejk | -6.10         | 3j22 | -4.10         |
| 4dmn     | -6.60         | 4ejk | -6.10         | 3vie | -3.90         |
| 4dmn     | -6.60         | 2zu3 | -6.10         | 4ep2 | -3.70         |
| 4b4n     | -6.60         | 2v6q | -6.10         | 4gu4 | -3.20         |
| 3su1     | -6.60         | 2q7c | -6.10         | 4gu4 | -3.20         |
| 3gsn     | -6.60         | 4ipz | -6.00         | 4gu4 | -3.10         |
| 3avn     | -6.60         | 3sug | -6.00         | 4gu4 | -3.10         |
| 3avj     | -6.60         | 2g69 | -6.00         | 4gu4 | -3.10         |
| 2xya     | -6.60         | 4mod | -5.90         | 4gu4 | -3.10         |
| 4i33     | -6.50         | 3sug | -5.90         | 4qhm | -2.90         |
| 4ejd     | -6.50         | 2m3m | -5.90         | 3iyp | -2.80         |
| 4ejd     | -6.50         | 1zsd | -5.80         | 2x5i | -2.80         |
| 4ejd     | -6.50         | 1yh3 | -5.80         | 4ipz | -2.50         |
| 4b4n     | -6.50         | 4nwk | -5.70         | 4gu3 | -2.30         |
| 3su5     | -6.50         | 4ipz | -5.70         | 4gu3 | -2.30         |
| 3s12     | -6.50         | 4c1w | -5.70         | 4gu3 | -2.30         |
| 3gsw     | -6.50         | 4lkk | -5.60         | 4gu3 | -2.30         |
| 2yhf     | -6.50         | 4ipz | -5.60         | 4uoa | -2.20         |
| 2me4     | -6.50         | 4g8i | -5.60         | 4gu3 | -2.20         |
| 1rzk     | -6.50         | 3zd0 | -5.60         | 4gu3 | -2.20         |
| 1qz8     | -6.50         | 2xpx | -5.60         | 4gu3 | -2.20         |
| 4g9d     | -6.40         | 2l2f | -5.60         | 4gu3 | -2.20         |
| 4g9d     | -6.40         | 4mod | -5.40         | 4gu3 | -2.20         |
| 4epj     | -6.40         | 4eqj | -5.40         | 4gu3 | -2.20         |

| <b>PDB</b> | <b>Docking score</b> |
|------------|----------------------|
| 4gu3       | -2.20                |
| 4gu3       | -2.20                |
| 3m5i       | -1.70                |
| 4epj       | -1.30                |
| 3m5g       | -1.20                |
| 4kom       | -1.10                |

| <b>PDB</b> | <b>Docking score</b> |
|------------|----------------------|
| 4dge       | -1.00                |
| 2jw8       | -1.00                |
| 3m5j       | -0.90                |
| 2zsv       | -0.50                |
| 2zsv       | -0.40                |
| 4g2k       | -0.30                |

| <b>PDB</b> | <b>Docking score</b> |
|------------|----------------------|
| 4e0r       | -0.20                |
| 4g2k       | -0.10                |



**Table S8.** Predicted docking score of Entrectinib against the viral protein panel.

| <b>PDB</b> | <b>Docking score</b> | <b>PDB</b> | <b>Docking score</b> | <b>PDB</b> | <b>Docking score</b> |
|------------|----------------------|------------|----------------------|------------|----------------------|
| 4j4x       | -13.00               | 4cdx       | -11.30               | 4uo0       | -10.90               |
| 3s11       | -12.20               | 3t3c       | -11.30               | 4rw4       | -10.90               |
| 2wrh       | -12.20               | 3kql       | -11.30               | 4rw4       | -10.90               |
| 4wm8       | -12.10               | 3kql       | -11.30               | 3u7s       | -10.90               |
| 4o4g       | -12.00               | 3bw9       | -11.30               | 3rwe       | -10.90               |
| 4g42       | -12.00               | 1r6a       | -11.30               | 3rwe       | -10.90               |
| 4j4y       | -11.90               | 4uo7       | -11.20               | 3r4b       | -10.90               |
| 1izh       | -11.90               | 4uo7       | -11.20               | 3ok9       | -10.90               |
| 4wm7       | -11.80               | 4qru       | -11.20               | 3lkh       | -10.90               |
| 4e78       | -11.80               | 4j4u       | -11.20               | 3lkh       | -10.90               |
| 2i4x       | -11.80               | 4hkj       | -11.20               | 3h98       | -10.90               |
| 4e78       | -11.70               | 4fnk       | -11.20               | 3h98       | -10.90               |
| 3kqh       | -11.70               | 3rwd       | -11.20               | 3gso       | -10.90               |
| 3fku       | -11.60               | 2i4w       | -11.20               | 3bw9       | -10.90               |
| 2wrg       | -11.60               | 4qru       | -11.10               | 3bev       | -10.90               |
| 2wrg       | -11.60               | 4qrs       | -11.10               | 2wre       | -10.90               |
| 2wrg       | -11.60               | 3wrg       | -11.10               | 2wre       | -10.90               |
| 2wrg       | -11.60               | 3wrg       | -11.10               | 2wre       | -10.90               |
| 2wrg       | -11.60               | 3kql       | -11.10               | 2wre       | -10.90               |
| 1klm       | -11.60               | 2wrc       | -11.10               | 2wre       | -10.90               |
| 4lsv       | -11.50               | 2bvo       | -11.10               | 1n5a       | -10.90               |
| 4j4w       | -11.50               | 1hhh       | -11.10               | 1hhi       | -10.90               |
| 4i2p       | -11.50               | 4uo2       | -11.00               | 4uo5       | -10.80               |
| 4gua       | -11.50               | 4pv9       | -11.00               | 4uo0       | -10.80               |
| 4cew       | -11.50               | 4mka       | -11.00               | 4q6r       | -10.80               |
| 4cdu       | -11.50               | 4k7f       | -11.00               | 4q6r       | -10.80               |
| 3nxu       | -11.50               | 4k7f       | -11.00               | 4j4s       | -10.80               |
| 2i4d       | -11.50               | 4g9f       | -11.00               | 4j4s       | -10.80               |
| 2hjk       | -11.50               | 4a92       | -11.00               | 3u7s       | -10.80               |
| 4rw7       | -11.40               | 4a92       | -11.00               | 3se9       | -10.80               |
| 4g43       | -11.40               | 3ztj       | -11.00               | 3bwa       | -10.80               |
| 4f3z       | -11.40               | 3i6l       | -11.00               | 2ygb       | -10.80               |
| 4cey       | -11.40               | 3gsw       | -11.00               | 2ygb       | -10.80               |
| 3t3c       | -11.40               | 3bew       | -11.00               | 2wr2       | -10.80               |
| 3kqn       | -11.40               | 2wrf       | -11.00               | 2i4v       | -10.80               |
| 3kqn       | -11.40               | 2wre       | -11.00               | 1izi       | -10.80               |
| 3kqn       | -11.40               | 1v2i       | -11.00               | 4uo5       | -10.70               |
| 3koa       | -11.40               | 1v2i       | -11.00               | 4uo5       | -10.70               |
| 3b0w       | -11.40               | 1p9u       | -11.00               | 4qrs       | -10.70               |
| 2wr3       | -11.40               | 1hhk       | -11.00               | 4qhk       | -10.70               |
| 2bvp       | -11.40               | 4uo2       | -10.90               | 4o44       | -10.70               |
| 4uo7       | -11.30               | 4uo2       | -10.90               | 4mka       | -10.70               |
| 4uo7       | -11.30               | 4uo2       | -10.90               | 4mg3       | -10.70               |
| 4uo7       | -11.30               | 4uo0       | -10.90               | 4mg3       | -10.70               |
| 4uo7       | -11.30               | 4uo0       | -10.90               | 4m8y       | -10.70               |
| 4i2p       | -11.30               | 4uo0       | -10.90               | 4m8y       | -10.70               |

| PDB  | Docking score | PDB  | Docking score | PDB  | Docking score |
|------|---------------|------|---------------|------|---------------|
| 4j4v | -10.70        | 4mmr | -10.50        | 1v3d | -10.40        |
| 4i2q | -10.70        | 4mk9 | -10.50        | 4uo2 | -10.30        |
| 4fvu | -10.70        | 4m8x | -10.50        | 4uo2 | -10.30        |
| 4e7a | -10.70        | 4m8x | -10.50        | 4unw | -10.30        |
| 3r4b | -10.70        | 4fqj | -10.50        | 4unw | -10.30        |
| 3ggg | -10.70        | 3rwi | -10.50        | 4unw | -10.30        |
| 3cpl | -10.70        | 3rwh | -10.50        | 4mkb | -10.30        |
| 2wr2 | -10.70        | 3rwh | -10.50        | 4mk9 | -10.30        |
| 2vww | -10.70        | 3n0i | -10.50        | 4jkg | -10.30        |
| 2vww | -10.70        | 3klv | -10.50        | 4j6r | -10.30        |
| 2axg | -10.70        | 3cpl | -10.50        | 4e5j | -10.30        |
| 1ida | -10.70        | 3alx | -10.50        | 4e5e | -10.30        |
| 4uo3 | -10.60        | 2wr4 | -10.50        | 4cdw | -10.30        |
| 4uo3 | -10.60        | 2wr1 | -10.50        | 3pqy | -10.30        |
| 4uo3 | -10.60        | 2uv0 | -10.50        | 3ku6 | -10.30        |
| 4uo3 | -10.60        | 2uv0 | -10.50        | 3ku6 | -10.30        |
| 4rw6 | -10.60        | 2uv0 | -10.50        | 3iyw | -10.30        |
| 4mkb | -10.60        | 2uv0 | -10.50        | 3iyw | -10.30        |
| 4mk8 | -10.60        | 2uv0 | -10.50        | 3iyw | -10.30        |
| 4m30 | -10.60        | 2uv0 | -10.50        | 3iyw | -10.30        |
| 4e7a | -10.60        | 2uv0 | -10.50        | 3gsr | -10.30        |
| 4e5l | -10.60        | 2uv0 | -10.50        | 3ggg | -10.30        |
| 3vcl | -10.60        | 2i4u | -10.50        | 2wr2 | -10.30        |
| 3vcl | -10.60        | 1syv | -10.50        | 2wa1 | -10.30        |
| 3vbr | -10.60        | 4uo3 | -10.40        | 2gec | -10.30        |
| 3rwc | -10.60        | 4uo0 | -10.40        | 4pg2 | -10.20        |
| 3n0i | -10.60        | 4uo0 | -10.40        | 4opa | -10.20        |
| 3h2l | -10.60        | 4uo0 | -10.40        | 4j4v | -10.20        |
| 3gso | -10.60        | 4uo0 | -10.40        | 4j4v | -10.20        |
| 3bwa | -10.60        | 4uo0 | -10.40        | 4fqj | -10.20        |
| 2wr1 | -10.60        | 4uo0 | -10.40        | 4ej8 | -10.20        |
| 2wr1 | -10.60        | 4uo0 | -10.40        | 4ej8 | -10.20        |
| 2wr0 | -10.60        | 4uo0 | -10.40        | 4e5i | -10.20        |
| 2wr0 | -10.60        | 4qhn | -10.40        | 4bac | -10.20        |
| 2wr0 | -10.60        | 4mk8 | -10.40        | 3rwc | -10.20        |
| 2wr0 | -10.60        | 4i7f | -10.40        | 3iyw | -10.20        |
| 2wr0 | -10.60        | 4fqj | -10.40        | 3gsw | -10.20        |
| 2uv0 | -10.60        | 4fnk | -10.40        | 3d23 | -10.20        |
| 2uv0 | -10.60        | 4cdq | -10.40        | 3d23 | -10.20        |
| 2uv0 | -10.60        | 3vbo | -10.40        | 2hcs | -10.20        |
| 2uv0 | -10.60        | 3iyw | -10.40        | 1pk0 | -10.20        |
| 1idb | -10.60        | 3gsq | -10.40        | 4uo3 | -10.10        |
| 1hhj | -10.60        | 3gsq | -10.40        | 4rw9 | -10.10        |
| 4uo0 | -10.50        | 3cj5 | -10.40        | 4pv9 | -10.10        |
| 4uo0 | -10.50        | 3cj2 | -10.40        | 4mk7 | -10.10        |
| 4uo0 | -10.50        | 2hu0 | -10.40        | 4j4v | -10.10        |
| 4uo0 | -10.50        | 2gec | -10.40        | 4j4v | -10.10        |
| 4uo0 | -10.50        | 1v3d | -10.40        | 4cqy | -10.10        |

| PDB           | Docking score | PDB  | Docking score | PDB  | Docking score |
|---------------|---------------|------|---------------|------|---------------|
| 3u82          | -10.10        | 4rw8 | -9.80         | 4adf | -9.60         |
| 3u82          | -10.10        | 4qru | -9.80         | 4adf | -9.60         |
| 3rki          | -10.10        | 4mms | -9.80         | 4adf | -9.60         |
| 3lqa          | -10.10        | 4mds | -9.80         | 3v3m | -9.60         |
| 3hkw          | -10.10        | 4mds | -9.80         | 3uf5 | -9.60         |
| 2htw          | -10.10        | 4lst | -9.80         | 3sdy | -9.60         |
| 4uo3          | -10.00        | 4lsr | -9.80         | 3ku5 | -9.60         |
| 4uo3          | -10.00        | 4jo8 | -9.80         | 3kna | -9.60         |
| 4uo3          | -10.00        | 4j4r | -9.80         | 3hky | -9.60         |
| 4uo3          | -10.00        | 4ejl | -9.80         | 3d0g | -9.60         |
| 4unx          | -10.00        | 3tie | -9.80         | 3cj3 | -9.60         |
| 4unx          | -10.00        | 3tie | -9.80         | 1v3c | -9.60         |
| 4unx          | -10.00        | 3nf9 | -9.80         | 1v3c | -9.60         |
| 4pv9          | -10.00        | 3nf9 | -9.80         | 1v3c | -9.60         |
| 4mgu          | -10.00        | 3mj5 | -9.80         | 1v3b | -9.60         |
| 4fqv          | -10.00        | 3mj5 | -9.80         | 4uo8 | -9.50         |
| 4cqr          | -10.00        | 3hkw | -9.80         | 4fqy | -9.50         |
| 4bh0          | -10.00        | 3ciz | -9.80         | 4eq0 | -9.50         |
| 3se8          | -10.00        | 2ygc | -9.80         | 4cqw | -9.50         |
| 3ciz          | -10.00        | 2ygc | -9.80         | 3zp0 | -9.50         |
| 3alz          | -10.00        | 2ht5 | -9.80         | 3vbh | -9.50         |
| 2xi5          | -10.00        | 1v3e | -9.80         | 3v3m | -9.50         |
| 2xi5          | -10.00        | 1b53 | -9.80         | 3sdy | -9.50         |
| 1quv          | -10.00        | 5ajm | -9.70         | 3hky | -9.50         |
| 1a41          | -10.00        | 4uo6 | -9.70         | 3avj | -9.50         |
| 4mk7          | -9.90         | 4lsu | -9.70         | 2zu5 | -9.50         |
| 4gaj          | -9.90         | 4lsu | -9.70         | 2x83 | -9.50         |
| 4gaj          | -9.90         | 4jkg | -9.70         | 4u6h | -9.40         |
| 4g8g          | -9.90         | 4g9f | -9.70         | 4qrt | -9.40         |
| 4g8g          | -9.90         | 4ejl | -9.70         | 4mmu | -9.40         |
| 4fqv          | -9.90         | 4e76 | -9.70         | 4mj1 | -9.40         |
| 4dag          | -9.90         | 4e5f | -9.70         | 4mj0 | -9.40         |
| 4cqr          | -9.90         | 3mlh | -9.70         | 4jb9 | -9.40         |
| 4bgz          | -9.90         | 3ku3 | -9.70         | 4gag | -9.40         |
| 3tid          | -9.90         | 3hkw | -9.70         | 4cqs | -9.40         |
| 3tid          | -9.90         | 3cj4 | -9.70         | 3ku5 | -9.40         |
| 3se8          | -9.90         | 3cj4 | -9.70         | 3d0h | -9.40         |
| 3h2l          | -9.90         | 2wr7 | -9.70         | 2vvx | -9.40         |
| 3ebj          | -9.90         | 1v3e | -9.70         | 2hu4 | -9.40         |
| 3cj5          | -9.90         | 1v3c | -9.70         | 4iv3 | -9.30         |
| 3cj3          | -9.90         | 5ajm | -9.60         | 4i2q | -9.30         |
| 3cj2          | -9.90         | 4g9z | -9.60         | 4fp8 | -9.30         |
| 3cj0          | -9.90         | 4g9z | -9.60         | 4fp8 | -9.30         |
| 3cj0          | -9.90         | 4fqy | -9.60         | 4eq0 | -9.30         |
| 2hty          | -9.90         | 4e5g | -9.60         | 4dkp | -9.30         |
| Main protease | -9.80         | 4adf | -9.60         | 4cqx | -9.30         |
| 4uo6          | -9.80         | 4adf | -9.60         | 4bgw | -9.30         |
|               |               | 4adf | -9.60         | 3zp2 | -9.30         |

| PDB  | Docking score | PDB  | Docking score | PDB  | Docking score |
|------|---------------|------|---------------|------|---------------|
| 3sdy | -9.30         | 4qhl | -9.00         | 3ava | -8.80         |
| 3nf9 | -9.30         | 4oph | -9.00         | 2c36 | -8.80         |
| 3nf9 | -9.30         | 4fqr | -9.00         | 1rzj | -8.80         |
| 3nf6 | -9.30         | 4fqr | -9.00         | 1r6a | -8.80         |
| 2xra | -9.30         | 4cqq | -9.00         | 4uny | -8.70         |
| 2x83 | -9.30         | 4cqq | -9.00         | 4mza | -8.70         |
| 2mgu | -9.30         | 4cqq | -9.00         | 4mza | -8.70         |
| 2hu4 | -9.30         | 4cqp | -9.00         | 4mj1 | -8.70         |
| 2hu4 | -9.30         | 4cqp | -9.00         | 4ffz | -8.70         |
| 2hu4 | -9.30         | 4cqp | -9.00         | 4cqz | -8.70         |
| 1v3b | -9.30         | 4bgx | -9.00         | 4bh3 | -8.70         |
| 1b50 | -9.30         | 3nfa | -9.00         | 4bh2 | -8.70         |
| 4unx | -9.20         | 3nf6 | -9.00         | 4bgx | -8.70         |
| 4mze | -9.20         | 3avg | -9.00         | 3uqi | -8.70         |
| 4gag | -9.20         | 2iph | -9.00         | 3sv8 | -8.70         |
| 4e91 | -9.20         | 2iph | -9.00         | 3nfa | -8.70         |
| 4cqy | -9.20         | 1oop | -9.00         | 3nfa | -8.70         |
| 4cqs | -9.20         | 1n59 | -9.00         | 3nf7 | -8.70         |
| 4bgy | -9.20         | 4pv8 | -8.90         | 3nf7 | -8.70         |
| 4bgw | -9.20         | 4lkj | -8.90         | 3nf7 | -8.70         |
| 3ztn | -9.20         | 4egt | -8.90         | 3i6g | -8.70         |
| 3s13 | -9.20         | 4dko | -8.90         | 3gsx | -8.70         |
| 3o4l | -9.20         | 4cqu | -8.90         | 3gsx | -8.70         |
| 3ku3 | -9.20         | 4bh1 | -8.90         | 2xwy | -8.70         |
| 3kmq | -9.20         | 4bh1 | -8.90         | 1p9s | -8.70         |
| 2vvx | -9.20         | 4bh1 | -8.90         | 4mze | -8.60         |
| 2oy0 | -9.20         | 3rwj | -8.90         | 4gv3 | -8.60         |
| 2c7u | -9.20         | 3rwj | -8.90         | 4gv3 | -8.60         |
| 4mmv | -9.10         | 3nf8 | -8.90         | 4cr0 | -8.60         |
| 4kpq | -9.10         | 3nf8 | -8.90         | 4cqu | -8.60         |
| 4fqi | -9.10         | 3nf8 | -8.90         | 4cqu | -8.60         |
| 4f3i | -9.10         | 3nf6 | -8.90         | 4cqu | -8.60         |
| 4f3i | -9.10         | 3avh | -8.90         | 4co6 | -8.60         |
| 4cqp | -9.10         | 3avb | -8.90         | 4bh3 | -8.60         |
| 4cqp | -9.10         | 2iph | -8.90         | 4bh3 | -8.60         |
| 4cqp | -9.10         | 2iph | -8.90         | 4bh3 | -8.60         |
| 3oah | -9.10         | 2c36 | -8.90         | 3zpb | -8.60         |
| 3nwf | -9.10         | 1sk7 | -8.90         | 3zp3 | -8.60         |
| 3nwa | -9.10         | 4jpk | -8.80         | 3zp1 | -8.60         |
| 3nwa | -9.10         | 4cqz | -8.80         | 3nf7 | -8.60         |
| 3nfa | -9.10         | 3uqi | -8.80         | 3gsv | -8.60         |
| 3nf6 | -9.10         | 3nf8 | -8.80         | 3avl | -8.60         |
| 3kms | -9.10         | 3gsv | -8.80         | 2zu4 | -8.60         |
| 3gsn | -9.10         | 3gsr | -8.80         | 2yka | -8.60         |
| 3avf | -9.10         | 3d0i | -8.80         | 5ajm | -8.50         |
| 3ava | -9.10         | 3avc | -8.80         | 5ajm | -8.50         |
| 3ava | -9.10         | 3avb | -8.80         | 5ajm | -8.50         |
| 2htu | -9.10         | 3ava | -8.80         | 5ajm | -8.50         |

| PDB  | Docking score | PDB       | Docking score | PDB  | Docking score |
|------|---------------|-----------|---------------|------|---------------|
| 4qrt | -8.50         | 4dgc      | -8.20         | 3su5 | -7.80         |
| 4lsp | -8.50         | 4dgc      | -8.20         | 3su5 | -7.80         |
| 4kps | -8.50         | 4dgc      | -8.20         | 3su5 | -7.80         |
| 4gye | -8.50         | 4dgc      | -8.20         | 3su1 | -7.80         |
| 4gye | -8.50         | 4dgb      | -8.20         | 3avk | -7.80         |
| 4fb3 | -8.50         | 4bh4      | -8.20         | 2hfz | -7.80         |
| 4ejd | -8.50         | 4b8e      | -8.20         | 4qrt | -7.70         |
| 4ejd | -8.50         | 4b8e      | -8.20         | 4mj0 | -7.70         |
| 4ejd | -8.50         | 4b8e      | -8.20         | 4lss | -7.70         |
| 4eee | -8.50         | 3su2      | -8.20         | 4iv1 | -7.70         |
| 4dga | -8.50         | 3gsu      | -8.20         | 4ejd | -7.70         |
| 4cqu | -8.50         | 2q7c      | -8.20         | 4dkq | -7.70         |
| 4cqu | -8.50         | 2q7c      | -8.20         | 3su6 | -7.70         |
| 3zpb | -8.50         | 1qz8      | -8.20         | 3su6 | -7.70         |
| 3zpb | -8.50         | 4mmt      | -8.10         | 3su3 | -7.70         |
| 3nw8 | -8.50         | 4dgc      | -8.10         | 2zty | -7.70         |
| 3gzf | -8.50         | 3p8n      | -8.10         | 2gvf | -7.70         |
| 3avn | -8.50         | 3gsw      | -8.10         | 1rzk | -7.70         |
| 3avl | -8.50         | 3avg      | -8.10         | 1rv7 | -7.70         |
| 3avb | -8.50         | 2z35      | -8.10         | 1f08 | -7.70         |
| 2q7c | -8.50         | 2wfo      | -8.10         | 4nwl | -7.60         |
| 2oy0 | -8.50         | 2bvq      | -8.10         | 4g9d | -7.60         |
| 2ge7 | -8.50         | 1rq9      | -8.10         | 4g8i | -7.60         |
| 4pv8 | -8.40         | 4nwk      | -8.00         | 4e92 | -7.60         |
| 4i32 | -8.40         | 4gv9      | -8.00         | 3vbf | -7.60         |
| 4i31 | -8.40         | 4ep3      | -8.00         | 3vbf | -7.60         |
| 4i31 | -8.40         | 3p8o      | -8.00         | 3sv9 | -7.60         |
| 4dgd | -8.40         | 1sys      | -8.00         | 3sv9 | -7.60         |
| 3zpa | -8.40         | Spike RBD | -7.90         | 3sv6 | -7.60         |
| 3rwi | -8.40         | 4i33      | -7.90         | 3sv6 | -7.60         |
| 3rwf | -8.40         | 4dgc      | -7.90         | 3sue | -7.60         |
| 3rwf | -8.40         | 4bh2      | -7.90         | 3su3 | -7.60         |
| 3oah | -8.40         | 3sud      | -7.90         | 3avh | -7.60         |
| 2hcn | -8.40         | 3su1      | -7.90         | 2zu1 | -7.60         |
| 2ghw | -8.40         | 3su0      | -7.90         | 2yhh | -7.60         |
| 4gzf | -8.30         | 3ro5      | -7.90         | 2lsp | -7.60         |
| 4gzf | -8.30         | 2xpx      | -7.90         | 2axf | -7.60         |
| 4dgb | -8.30         | 2wfo      | -7.90         | 2axf | -7.60         |
| 4dga | -8.30         | 2vvy      | -7.90         | 1rpi | -7.60         |
| 4bh4 | -8.30         | 2ge8      | -7.90         | 3sis | -7.50         |
| 4bh4 | -8.30         | Papain    | -7.80         | 3sis | -7.50         |
| 4bh4 | -8.30         | protease  | -7.80         | 3avn | -7.50         |
| 3gsu | -8.30         | 4oyd      | -7.80         | 3avc | -7.50         |
| 3avk | -8.30         | 4gve      | -7.80         | 2xpx | -7.50         |
| 3avb | -8.30         | 4ep3      | -7.80         | 2wh6 | -7.50         |
| 4g9d | -8.20         | 4ejd      | -7.80         | 2ca1 | -7.50         |
| 4e92 | -8.20         | 3suf      | -7.80         | 3w39 | -7.40         |
| 4dgd | -8.20         | 3sud      | -7.80         | 3sv7 | -7.40         |

| PDB  | Docking score | PDB  | Docking score | PDB  | Docking score |
|------|---------------|------|---------------|------|---------------|
| 3rkc | -7.40         | 3sit | -6.90         | 4ipz | -5.80         |
| 2yol | -7.40         | 3sit | -6.90         | 4ipz | -5.80         |
| 2y1s | -7.40         | 3b71 | -6.90         | 2me3 | -5.80         |
| 2xze | -7.40         | 3b71 | -6.90         | 2l2f | -5.80         |
| 2wh6 | -7.40         | 2q7c | -6.90         | 4ipz | -5.70         |
| 2ghv | -7.40         | 2q7c | -6.90         | 4ipz | -5.70         |
| 4g8i | -7.30         | 2q7c | -6.90         | 4ipz | -5.70         |
| 4ekx | -7.30         | 4ejk | -6.80         | 4ipz | -5.70         |
| 3su0 | -7.30         | 3vie | -6.80         | 4mod | -5.60         |
| 3bwa | -7.30         | 3u83 | -6.80         | 4ipz | -5.60         |
| 2yol | -7.30         | 3su4 | -6.80         | 4ipz | -5.60         |
| 2xze | -7.30         | 3su4 | -6.80         | 2x9m | -5.60         |
| 2xya | -7.30         | 3sit | -6.80         | 2vxj | -5.60         |
| 1rpi | -7.30         | 2ztz | -6.80         | 2me4 | -5.60         |
| 4jpi | -7.20         | 3alw | -6.70         | 4uo4 | -5.50         |
| 4ejk | -7.20         | 2v6q | -6.70         | 4ipz | -5.50         |
| 4dkr | -7.20         | 4ffy | -6.60         | 4adq | -5.50         |
| 3sv7 | -7.20         | 2yhf | -6.60         | 4adq | -5.50         |
| 3su2 | -7.20         | 2c86 | -6.60         | 3giv | -5.50         |
| 3su2 | -7.20         | 4nwk | -6.50         | 2m3m | -5.50         |
| 2g69 | -7.20         | 2m3l | -6.50         | 3vie | -5.30         |
| 3sug | -7.10         | 2me2 | -6.40         | 2mkr | -5.30         |
| 3m5h | -7.10         | 2g69 | -6.40         | 3j22 | -5.00         |
| 3ifu | -7.10         | 2c3a | -6.40         | 3vtt | -4.90         |
| 3a07 | -7.10         | 4c1w | -6.30         | 3j23 | -4.90         |
| 2vxw | -7.10         | 3s12 | -6.30         | 2l3h | -4.70         |
| 1z8r | -7.10         | 2zu3 | -6.30         | 4epj | -4.60         |
| 1yh3 | -7.10         | 2q5u | -6.30         | 3vtt | -4.60         |
| 4oyd | -7.00         | 2q5u | -6.30         | 4ep2 | -4.10         |
| 4ejk | -7.00         | 2q5u | -6.30         | 3m5g | -4.10         |
| 4ejd | -7.00         | 2q5u | -6.30         | 1hhg | -4.10         |
| 4ejd | -7.00         | 2q5u | -6.30         | 4ep2 | -3.90         |
| 4dmn | -7.00         | 2q5u | -6.30         | 4g2k | -3.80         |
| 4dmn | -7.00         | 1qr8 | -6.30         | 4g2k | -3.50         |
| 4b4n | -7.00         | 4epj | -6.20         | 4qhm | -3.10         |
| 4b4n | -7.00         | 4c1w | -6.20         | 4lki | -3.10         |
| 3sug | -7.00         | 3kqk | -6.10         | 4lkh | -3.10         |
| 3sit | -7.00         | 3i6k | -6.10         | 4lkk | -1.90         |
| 3sit | -7.00         | 1zsd | -6.10         | 4dge | -1.30         |
| 3avj | -7.00         | 4ipz | -6.00         | 2zsv | -1.00         |
| 2zol | -7.00         | 4eqj | -6.00         | 2zsv | -1.00         |
| 1qr9 | -7.00         | 3zd0 | -6.00         | 4e0r | -0.50         |
| 4ejd | -6.90         | 4ejr | -5.90         | 4g1g | -0.30         |
| 4ejd | -6.90         | 4mod | -5.80         | 4fqm | -0.20         |
| 3u83 | -6.90         | 4ipz | -5.80         | 2x5i | -0.10         |
| 3sit | -6.90         | 4ipz | -5.80         |      |               |

**Table S 9.** Predicted docking score of Bromocriptine against the viral protein panel.

| <b>PDB</b> | <b>Docking score</b> | <b>PDB</b> | <b>Docking score</b> | <b>PDB</b> | <b>Docking score</b> |
|------------|----------------------|------------|----------------------|------------|----------------------|
| 3u7s       | -12.80               | 3koa       | -10.50               | 4rw8       | -10.10               |
| 3u7s       | -12.70               | 3cj5       | -10.50               | 4qru       | -10.10               |
| 3nxu       | -11.80               | 2wr0       | -10.50               | 4mk7       | -10.10               |
| 3kqn       | -11.60               | 4uo3       | -10.40               | 4mk7       | -10.10               |
| 4j4x       | -11.50               | 4qrs       | -10.40               | 4j4w       | -10.10               |
| 3kqn       | -11.50               | 4qrs       | -10.40               | 4j4u       | -10.10               |
| 3kqn       | -11.50               | 4mk9       | -10.40               | 4fnk       | -10.10               |
| 1ida       | -11.30               | 3hky       | -10.40               | 4ej8       | -10.10               |
| 4j4s       | -11.20               | 3hky       | -10.40               | 4ej8       | -10.10               |
| 4j4s       | -11.20               | 3ggu       | -10.40               | 3t3c       | -10.10               |
| 4a92       | -11.10               | 3cj5       | -10.40               | 3cj4       | -10.10               |
| 3lkh       | -11.10               | 3cj2       | -10.40               | 2wrg       | -10.10               |
| 2i4v       | -11.10               | 2i4w       | -10.40               | 2wrg       | -10.10               |
| 4uo3       | -11.00               | 2i4u       | -10.40               | 2wrg       | -10.10               |
| 4g42       | -11.00               | 1p9u       | -10.40               | 2wrg       | -10.10               |
| 4uo7       | -10.90               | 4uo3       | -10.30               | 4rw9       | -10.00               |
| 4uo7       | -10.90               | 4uo3       | -10.30               | 4mkb       | -10.00               |
| 4uo7       | -10.90               | 4uo3       | -10.30               | 4e5e       | -10.00               |
| 4uo7       | -10.90               | 4rw4       | -10.30               | 4bac       | -10.00               |
| 4uo7       | -10.90               | 4rw4       | -10.30               | 3vbo       | -10.00               |
| 4a92       | -10.90               | 4qru       | -10.30               | 3tid       | -10.00               |
| 3hkw       | -10.90               | 4pg2       | -10.30               | 3ok9       | -10.00               |
| 3hkw       | -10.90               | 4mkb       | -10.30               | 3h2l       | -10.00               |
| 3hkw       | -10.90               | 4j4v       | -10.30               | 3h2l       | -10.00               |
| 4uo7       | -10.80               | 4j4v       | -10.30               | 3d23       | -10.00               |
| 3cj0       | -10.80               | 3cj2       | -10.30               | 3d23       | -10.00               |
| 1quv       | -10.80               | 2wr1       | -10.30               | 3cpl       | -10.00               |
| 4o44       | -10.70               | 2wr0       | -10.30               | 3cj4       | -10.00               |
| 3cj0       | -10.70               | 1syv       | -10.30               | 3bew       | -10.00               |
| 2wr0       | -10.70               | 1r6a       | -10.30               | 2ygb       | -10.00               |
| 2i4x       | -10.70               | 4uo5       | -10.20               | 2ygb       | -10.00               |
| 4q6r       | -10.60               | 4uo5       | -10.20               | 2wr4       | -10.00               |
| 4q6r       | -10.60               | 4mk8       | -10.20               | 4qhk       | -9.90                |
| 4mka       | -10.60               | 4mk8       | -10.20               | 4j4v       | -9.90                |
| 4e7a       | -10.60               | 4j4y       | -10.20               | 4gua       | -9.90                |
| 4e7a       | -10.60               | 4j4v       | -10.20               | 4e78       | -9.90                |
| 3kqh       | -10.60               | 4j4v       | -10.20               | 4e78       | -9.90                |
| 3cj3       | -10.60               | 3ztj       | -10.20               | 3tie       | -9.90                |
| 3cj3       | -10.60               | 3h98       | -10.20               | 3tie       | -9.90                |
| 3ciz       | -10.60               | 3h98       | -10.20               | 2wre       | -9.90                |
| 3ciz       | -10.60               | 2wrg       | -10.20               | 2wre       | -9.90                |
| 2wr0       | -10.60               | 2wr1       | -10.20               | 1n5a       | -9.90                |
| 2i4d       | -10.60               | 2wr1       | -10.20               | 4uo0       | -9.80                |
| 4mka       | -10.50               | 2axg       | -10.20               | 4uo0       | -9.80                |
| 4bh0       | -10.50               | 4wm8       | -10.10               | 4uo0       | -9.80                |
| 3t3c       | -10.50               | 4uo5       | -10.10               | 4uo0       | -9.80                |

| PDB           | Docking score | PDB  | Docking score | PDB  | Docking score |
|---------------|---------------|------|---------------|------|---------------|
| 4uo0          | -9.80         | 4unw | -9.60         | 4cqu | -9.40         |
| 4uo0          | -9.80         | 4rw7 | -9.60         | 4cqu | -9.40         |
| 4uo0          | -9.80         | 4pv9 | -9.60         | 4cqu | -9.40         |
| 4uo0          | -9.80         | 4pv9 | -9.60         | 4cqu | -9.40         |
| 4uo0          | -9.80         | 4o4g | -9.60         | 4cqr | -9.40         |
| 4uo0          | -9.80         | 4i2q | -9.60         | 4cqr | -9.40         |
| 4uo0          | -9.80         | 4fqy | -9.60         | 4adf | -9.40         |
| 4uo0          | -9.80         | 4fp8 | -9.60         | 4adf | -9.40         |
| 4uo0          | -9.80         | 4cqw | -9.60         | 4adf | -9.40         |
| 4uo0          | -9.80         | 3s11 | -9.60         | 4adf | -9.40         |
| 4uo0          | -9.80         | 3rwe | -9.60         | 4adf | -9.40         |
| 4uo0          | -9.80         | 3kql | -9.60         | 4adf | -9.40         |
| 4uo0          | -9.80         | 3kql | -9.60         | 3rki | -9.40         |
| 4uo0          | -9.80         | 3kql | -9.60         | 3gsq | -9.40         |
| 4unw          | -9.80         | 3ebj | -9.60         | 3bw9 | -9.40         |
| 4unw          | -9.80         | 5ajm | -9.50         | 2wr2 | -9.40         |
| 4pv9          | -9.80         | 5ajm | -9.50         | 2wr2 | -9.40         |
| 4jo8          | -9.80         | 5ajm | -9.50         | 2hcs | -9.40         |
| 3mlh          | -9.80         | 5ajm | -9.50         | 1hhi | -9.40         |
| 3cpl          | -9.80         | 5ajm | -9.50         | 4uo2 | -9.30         |
| 2ygc          | -9.80         | 5ajm | -9.50         | 4uo2 | -9.30         |
| 2ygc          | -9.80         | 4opa | -9.50         | 4uo2 | -9.30         |
| 2wre          | -9.80         | 4j4r | -9.50         | 4uo2 | -9.30         |
| 2gec          | -9.80         | 4fqr | -9.50         | 4uo2 | -9.30         |
| 2gec          | -9.80         | 4fqj | -9.50         | 4uo2 | -9.30         |
| 2bvo          | -9.80         | 3tid | -9.50         | 4uny | -9.30         |
| 1idb          | -9.80         | 3rwe | -9.50         | 4mj1 | -9.30         |
| 1hhk          | -9.80         | 3nf6 | -9.50         | 4m8y | -9.30         |
| Main protease | -9.70         | 3n0i | -9.50         | 4k7f | -9.30         |
| 4mk9          | -9.70         | 3lkh | -9.50         | 4fnk | -9.30         |
| 4mds          | -9.70         | 3ku3 | -9.50         | 4cqv | -9.30         |
| 4mds          | -9.70         | 3kna | -9.50         | 4bgx | -9.30         |
| 4fqy          | -9.70         | 2wr2 | -9.50         | 4bgx | -9.30         |
| 4cqq          | -9.70         | 2wr0 | -9.50         | 3vbh | -9.30         |
| 4cqq          | -9.70         | 2hjk | -9.50         | 3s13 | -9.30         |
| 4cqq          | -9.70         | 4uo3 | -9.40         | 3r4b | -9.30         |
| 4cqq          | -9.70         | 4uo3 | -9.40         | 3nf8 | -9.30         |
| 3vbr          | -9.70         | 4uo3 | -9.40         | 3nf7 | -9.30         |
| 3se8          | -9.70         | 4gaj | -9.40         | 3n0i | -9.30         |
| 3se8          | -9.70         | 4gaj | -9.40         | 3gsu | -9.30         |
| 3rwd          | -9.70         | 4gag | -9.40         | 3bev | -9.30         |
| 3fku          | -9.70         | 4gag | -9.40         | 2xwy | -9.30         |
| 3bwa          | -9.70         | 4g9f | -9.40         | 2vux | -9.30         |
| 2wrh          | -9.70         | 4fqr | -9.40         | 1a41 | -9.30         |
| 2wre          | -9.70         | 4e5f | -9.40         | 4unx | -9.20         |
| 2wre          | -9.70         | 4cr0 | -9.40         | 4unx | -9.20         |
| 2wre          | -9.70         | 4cqu | -9.40         | 4unx | -9.20         |
| 2wa1          | -9.70         | 4cqu | -9.40         | 4rw6 | -9.20         |



| PDB  | Docking score | PDB  | Docking score | PDB  | Docking score |
|------|---------------|------|---------------|------|---------------|
| 4qhn | -9.20         | 4uo3 | -9.00         | 4bgw | -8.70         |
| 3zp3 | -9.20         | 4mj0 | -9.00         | 3zpb | -8.70         |
| 3zp1 | -9.20         | 4m30 | -9.00         | 3zp0 | -8.70         |
| 3sdy | -9.20         | 4m8y | -9.00         | 3u82 | -8.70         |
| 3sdy | -9.20         | 4kpq | -9.00         | 3u82 | -8.70         |
| 3sdy | -9.20         | 4jb9 | -9.00         | 3rwg | -8.70         |
| 3rwh | -9.20         | 4g43 | -9.00         | 3rwg | -8.70         |
| 3rwh | -9.20         | 4e5g | -9.00         | 2xra | -8.70         |
| 3rwc | -9.20         | 4dag | -9.00         | 2vvx | -8.70         |
| 3rwc | -9.20         | 4cqp | -9.00         | 2oy0 | -8.70         |
| 3r4b | -9.20         | 4bh1 | -9.00         | 1v3e | -8.70         |
| 3nf7 | -9.20         | 4bh1 | -9.00         | 1v3b | -8.70         |
| 3iyw | -9.20         | 4bh1 | -9.00         | 4uo6 | -8.60         |
| 3iyw | -9.20         | 3v3m | -9.00         | 4mza | -8.60         |
| 3iyw | -9.20         | 3se9 | -9.00         | 4m8x | -8.60         |
| 3iyw | -9.20         | 3gso | -9.00         | 4ejl | -8.60         |
| 3iyw | -9.20         | 2vvw | -9.00         | 4e76 | -8.60         |
| 3iyw | -9.20         | 1hhj | -9.00         | 4cqz | -8.60         |
| 3i6l | -9.20         | 1hhh | -9.00         | 4bgw | -8.60         |
| 3gsw | -9.20         | 4uo3 | -8.90         | 3zpa | -8.60         |
| 3gso | -9.20         | 4m8x | -8.90         | 3zp2 | -8.60         |
| 3bwa | -9.20         | 4kps | -8.90         | 3nfa | -8.60         |
| 3avl | -9.20         | 4hkj | -8.90         | 3ku6 | -8.60         |
| 3ava | -9.20         | 4ffz | -8.90         | 3ku6 | -8.60         |
| 3ava | -9.20         | 4ejl | -8.90         | 3ku3 | -8.60         |
| 1v3d | -9.20         | 3zp6 | -8.90         | 3klv | -8.60         |
| 1v3d | -9.20         | 3vcl | -8.90         | 3d0h | -8.60         |
| 1klm | -9.20         | 3rwi | -8.90         | 3alz | -8.60         |
| 4unx | -9.10         | 3nf7 | -8.90         | 2hty | -8.60         |
| 4lst | -9.10         | 3nf7 | -8.90         | 1v3b | -8.60         |
| 4k7f | -9.10         | 3ku5 | -8.90         | 1rzj | -8.60         |
| 4cqp | -9.10         | 3gsq | -8.90         | 1oop | -8.60         |
| 4cqp | -9.10         | 3ggg | -8.90         | 1b53 | -8.60         |
| 4cqp | -9.10         | 3b0w | -8.90         | 4lsv | -8.50         |
| 4cqp | -9.10         | 3avj | -8.90         | 4i2q | -8.50         |
| 4cqp | -9.10         | 2vvw | -8.90         | 4cqz | -8.50         |
| 4cew | -9.10         | 1izi | -8.90         | 4bgz | -8.50         |
| 3v3m | -9.10         | 4i2p | -8.80         | 3nwa | -8.50         |
| 3nf8 | -9.10         | 4fp8 | -8.80         | 3nwa | -8.50         |
| 3gsr | -9.10         | 4cqs | -8.80         | 3nfa | -8.50         |
| 3d0g | -9.10         | 4cqs | -8.80         | 3nfa | -8.50         |
| 3bw9 | -9.10         | 4co6 | -8.80         | 3nfa | -8.50         |
| 2wr7 | -9.10         | 3zpb | -8.80         | 3nf8 | -8.50         |
| 2hu4 | -9.10         | 3vcl | -8.80         | 3avh | -8.50         |
| 2hu4 | -9.10         | 3ku5 | -8.80         | 2uv0 | -8.50         |
| 2hu4 | -9.10         | 2hu0 | -8.80         | 2uv0 | -8.50         |
| 2hu4 | -9.10         | 1v3e | -8.80         | 2uv0 | -8.50         |
| 2bvp | -9.10         | 4lsr | -8.70         | 2uv0 | -8.50         |

| PDB  | Docking score | PDB       | Docking score | PDB  | Docking score |
|------|---------------|-----------|---------------|------|---------------|
| 2htw | -8.50         | 2iph      | -8.20         | 4pv8 | -7.70         |
| 4wm7 | -8.40         | 1v3c      | -8.20         | 4dkq | -7.70         |
| 4mj1 | -8.40         | 1v3c      | -8.20         | 4dgd | -7.70         |
| 4fqi | -8.40         | 1v3c      | -8.20         | 4cey | -7.70         |
| 4bgy | -8.40         | 4uo6      | -8.10         | 3ztn | -7.70         |
| 3nf9 | -8.40         | 4qhl      | -8.10         | 3uf5 | -7.70         |
| 3nf6 | -8.40         | 4mza      | -8.10         | 3oah | -7.70         |
| 3avf | -8.40         | 4iv3      | -8.10         | 3gsu | -7.70         |
| 2z35 | -8.40         | 3nwf      | -8.10         | 3alx | -7.70         |
| 2uv0 | -8.40         | 3nf9      | -8.10         | 2wh6 | -7.70         |
| 2uv0 | -8.40         | 3avg      | -8.10         | 2vvy | -7.70         |
| 2uv0 | -8.40         | 2x83      | -8.10         | 2hcn | -7.70         |
| 2uv0 | -8.40         | 2iph      | -8.10         | 1n59 | -7.70         |
| 2uv0 | -8.40         | 2ht5      | -8.10         | 4lsp | -7.60         |
| 2uv0 | -8.40         | 1v3c      | -8.10         | 4fvu | -7.60         |
| 2uv0 | -8.40         | 4mmr      | -8.00         | 4f3i | -7.60         |
| 2uv0 | -8.40         | 4eq0      | -8.00         | 4f3i | -7.60         |
| 2oy0 | -8.40         | 4cqx      | -8.00         | 4e5l | -7.60         |
| 2mgu | -8.40         | 4bh4      | -8.00         | 4dkp | -7.60         |
| 1v2i | -8.40         | 4bh4      | -8.00         | 4cdq | -7.60         |
| 1v2i | -8.40         | 4bh4      | -8.00         | 3vbf | -7.60         |
| 1sk7 | -8.40         | 4bh2      | -8.00         | 3su1 | -7.60         |
| 1rv7 | -8.40         | 4bh2      | -8.00         | 3nw8 | -7.60         |
| 1izh | -8.40         | 3ro5      | -8.00         | 3avb | -7.60         |
| 4mmu | -8.30         | 3o4l      | -8.00         | 3avb | -7.60         |
| 4mgu | -8.30         | 3avn      | -8.00         | 2ge8 | -7.60         |
| 4g8g | -8.30         | 2wr3      | -8.00         | 4qru | -7.50         |
| 4g8g | -8.30         | 2gvf      | -8.00         | 4f3z | -7.50         |
| 4eq0 | -8.30         | 1rzk      | -8.00         | 4cqy | -7.50         |
| 3nf8 | -8.30         | 1b50      | -8.00         | 3vbf | -7.50         |
| 2wrf | -8.30         | 4mms      | -7.90         | 3rwi | -7.50         |
| 2ge7 | -8.30         | 4i2p      | -7.90         | 3oah | -7.50         |
| 1r6a | -8.30         | 4gve      | -7.90         | 3nf6 | -7.50         |
| 1pk0 | -8.30         | 4egt      | -7.90         | 3nf6 | -7.50         |
| 4mj0 | -8.20         | 2xi5      | -7.90         | 3mj5 | -7.50         |
| 4mg3 | -8.20         | 2xi5      | -7.90         | 3mj5 | -7.50         |
| 4mg3 | -8.20         | 2x83      | -7.90         | 3i6g | -7.50         |
| 4lsu | -8.20         | 2wrc      | -7.90         | 3gsw | -7.50         |
| 4lsu | -8.20         | 2ghw      | -7.90         | 3avc | -7.50         |
| 4j6r | -8.20         | 2c7u      | -7.90         | 4i31 | -7.40         |
| 4i7f | -8.20         | 1p9s      | -7.90         | 4i31 | -7.40         |
| 4fb3 | -8.20         | 4pv8      | -7.80         | 4cdx | -7.40         |
| 4e5j | -8.20         | 4g9f      | -7.80         | 4cdw | -7.40         |
| 3lqa | -8.20         | 3nf9      | -7.80         | 3avl | -7.40         |
| 2zu5 | -8.20         | 3nf9      | -7.80         | 3ava | -7.40         |
| 2zu4 | -8.20         | 3gsv      | -7.80         | 3ava | -7.40         |
| 2iph | -8.20         | Spike RBD | -7.70         | 2htu | -7.40         |
| 2iph | -8.20         | 4qrt      | -7.70         | 2c36 | -7.40         |

| PDB      | Docking score | PDB  | Docking score | PDB  | Docking score |
|----------|---------------|------|---------------|------|---------------|
| 2c36     | -7.40         | 4iv1 | -6.90         | 4i33 | -6.50         |
| 4qrt     | -7.30         | 4ejd | -6.90         | 4e91 | -6.50         |
| 4oyd     | -7.30         | 4ejd | -6.90         | 4bh3 | -6.50         |
| 4i32     | -7.30         | 4e5i | -6.90         | 4bh3 | -6.50         |
| 4dko     | -7.30         | 4dgc | -6.90         | 4bh3 | -6.50         |
| 3avk     | -7.30         | 4b8e | -6.90         | 4bh3 | -6.50         |
| 3avb     | -7.30         | 3su0 | -6.90         | 3vie | -6.50         |
| 3avb     | -7.30         | 3sis | -6.90         | 3su3 | -6.50         |
| 3a07     | -7.30         | 3gsx | -6.90         | 3su3 | -6.50         |
| 2zty     | -7.30         | 3gsx | -6.90         | 3sit | -6.50         |
| 2yka     | -7.30         | 1yh3 | -6.90         | 2ztz | -6.50         |
| 2q7c     | -7.30         | 4lss | -6.80         | 2g69 | -6.50         |
| 2ghv     | -7.30         | 4gv3 | -6.80         | 2bvq | -6.50         |
| 4fqi     | -7.20         | 4gv3 | -6.80         | 1f08 | -6.50         |
| 4fqi     | -7.20         | 4dkr | -6.80         | 4oph | -6.40         |
| 4cdu     | -7.20         | 4b8e | -6.80         | 4lkj | -6.40         |
| 3w39     | -7.20         | 2wh6 | -6.80         | 4gv9 | -6.40         |
| 3sud     | -7.20         | 2q7c | -6.80         | 4g9z | -6.40         |
| 3gsr     | -7.20         | 2g69 | -6.80         | 4fqv | -6.40         |
| 3avh     | -7.20         | 1rpi | -6.80         | 4ejk | -6.40         |
| 3avg     | -7.20         | 4qrt | -6.70         | 4dmn | -6.40         |
| 2q7c     | -7.20         | 4jpp | -6.70         | 4dmn | -6.40         |
| 4dgc     | -7.10         | 4jpk | -6.70         | 3ifu | -6.40         |
| 4dgc     | -7.10         | 4g9z | -6.70         | 3gsn | -6.40         |
| 4dgc     | -7.10         | 4ffy | -6.70         | 3bwa | -6.40         |
| 4dgc     | -7.10         | 4e92 | -6.70         | 3avc | -6.40         |
| 4dgc     | -7.10         | 4e92 | -6.70         | 2yhf | -6.40         |
| 4bh4     | -7.10         | 3su6 | -6.70         | 2xpx | -6.40         |
| 3su2     | -7.10         | 3sis | -6.70         | 2me2 | -6.40         |
| 3su2     | -7.10         | 3m5h | -6.70         | 4nwl | -6.30         |
| 3rwj     | -7.10         | 2zu1 | -6.70         | 4gye | -6.30         |
| 3rwj     | -7.10         | 2v6q | -6.70         | 4fqv | -6.30         |
| 3rwf     | -7.10         | 1rpi | -6.70         | 4ejd | -6.30         |
| 3rwf     | -7.10         | 4oyd | -6.60         | 3u83 | -6.30         |
| 3gsv     | -7.10         | 4gzf | -6.60         | 3u83 | -6.30         |
| 3gsu     | -7.10         | 4gzf | -6.60         | 3sv6 | -6.30         |
| 2xya     | -7.10         | 4dgb | -6.60         | 3sv6 | -6.30         |
| 2xpx     | -7.10         | 4dgb | -6.60         | 3su5 | -6.30         |
| Papain   | -7.00         | 3uqi | -6.60         | 2nze | -6.30         |
| protease | -7.00         | 3sv8 | -6.60         | 2vxw | -6.30         |
| 4ejd     | -7.00         | 3sit | -6.60         | 1sys | -6.30         |
| 4dgd     | -7.00         | 3sit | -6.60         | 4jpk | -6.20         |
| 4b8e     | -7.00         | 3sit | -6.60         | 4epj | -6.20         |
| 3pqy     | -7.00         | 3sit | -6.60         | 4ep3 | -6.20         |
| 2lsp     | -7.00         | 3sit | -6.60         | 4ep3 | -6.20         |
| 2ca1     | -7.00         | 2zol | -6.60         | 4eee | -6.20         |
| 1rq9     | -7.00         | 2yol | -6.60         | 4b4n | -6.20         |
| 1qz8     | -7.00         | 1qr8 | -6.60         | 3sv9 | -6.20         |

| PDB  | Docking score | PDB  | Docking score | PDB  | Docking score |
|------|---------------|------|---------------|------|---------------|
| 3sud | -6.20         | 4mod | -5.80         | 4dga | -4.70         |
| 3su6 | -6.20         | 4mod | -5.80         | 3vtt | -4.70         |
| 3su5 | -6.20         | 4mmv | -5.80         | 2hfz | -4.70         |
| 3su5 | -6.20         | 4gye | -5.80         | 4dga | -4.60         |
| 3su4 | -6.20         | 4ekx | -5.80         | 3zd0 | -4.60         |
| 3su4 | -6.20         | 4ejd | -5.80         | 4g8i | -4.50         |
| 3su2 | -6.20         | 3sug | -5.80         | 4ep2 | -4.50         |
| 3su1 | -6.20         | 3gzf | -5.80         | 1z8r | -4.50         |
| 3kmq | -6.20         | 2yol | -5.80         | 4g9d | -4.40         |
| 3b71 | -6.20         | 4mmt | -5.70         | 4ep2 | -4.40         |
| 2yhh | -6.20         | 4c1w | -5.70         | 3j23 | -4.40         |
| 2y1s | -6.20         | 3uqi | -5.70         | 3j22 | -4.40         |
| 2q5u | -6.20         | 3i6k | -5.70         | 4uo8 | -4.10         |
| 2q5u | -6.20         | 3avk | -5.70         | 4epj | -3.90         |
| 2q5u | -6.20         | 3alw | -5.70         | 2l3h | -3.80         |
| 2q5u | -6.20         | 2m3l | -5.70         | 4ejk | -3.60         |
| 2q5u | -6.20         | 4mze | -5.60         | 2m3m | -3.60         |
| 2q5u | -6.20         | 2xze | -5.60         | 4ipz | -3.50         |
| 4u6h | -6.10         | 2q7c | -5.60         | 4ipz | -3.40         |
| 4nwk | -6.10         | 2q7c | -5.60         | 2me3 | -3.40         |
| 4jkg | -6.10         | 2q7c | -5.60         | 4qhm | -3.30         |
| 4ejr | -6.10         | 2c3a | -5.60         | 4ipz | -2.90         |
| 4ejd | -6.10         | 4mze | -5.50         | 4ipz | -2.90         |
| 4ejd | -6.10         | 3sue | -5.50         | 4ipz | -2.80         |
| 4ejd | -6.10         | 2x9m | -5.50         | 4ipz | -1.90         |
| 4b4n | -6.10         | 4adq | -5.40         | 4dge | -1.60         |
| 3sug | -6.10         | 4adq | -5.40         | 4eqj | -1.50         |
| 3suf | -6.10         | 2me4 | -5.40         | 2zsv | -1.10         |
| 3su0 | -6.10         | 2l2f | -5.40         | 2zsv | -1.00         |
| 3s12 | -6.10         | 4ipz | -5.30         | 4e0r | -0.70         |
| 3p8o | -6.10         | 4c1w | -5.20         | 4gu4 | -0.60         |
| 3p8n | -6.10         | 3avn | -5.20         | 4gu4 | -0.60         |
| 3kms | -6.10         | 2mkr | -5.20         | 4gu4 | -0.60         |
| 2wfo | -6.10         | 1qr9 | -5.20         | 4gu4 | -0.60         |
| 2axf | -6.10         | 4g8i | -5.10         | 4gu4 | -0.60         |
| 4nwk | -6.00         | 3vtt | -5.10         | 4gu4 | -0.50         |
| 4g9d | -6.00         | 1zsd | -5.10         | 3m5i | -0.40         |
| 3sv7 | -6.00         | 3kqk | -5.00         | 4gu3 | -0.10         |
| 3d0i | -6.00         | 3giv | -5.00         | 4gu3 | -0.10         |
| 3b71 | -6.00         | 4ejk | -4.90         | 4gu3 | -0.10         |
| 2wfo | -6.00         | 3vie | -4.90         | 4gu3 | -0.10         |
| 4ejd | -5.90         | 2zu3 | -4.90         | 4gu3 | -0.10         |
| 3sv9 | -5.90         | 2vxj | -4.90         | 4gu3 | -0.10         |
| 3sv7 | -5.90         | 4ipz | -4.80         | 4gu3 | -0.10         |
| 3rc  | -5.90         | 4ipz | -4.80         | 4gu3 | -0.10         |
| 3avj | -5.90         | 4ipz | -4.70         | 4gu3 | -0.10         |
| 2c86 | -5.90         | 4ipz | -4.70         | 4gu3 | -0.10         |
| 2axf | -5.90         | 4ipz | -4.70         | 4gu3 | -0.10         |

| <b>PDB</b> | <b>Docking score</b> |
|------------|----------------------|
| 4gu3       | -0.10                |

| <b>PDB</b> | <b>Docking score</b> |
|------------|----------------------|
| 4fqm       | -0.10                |

**Table S 10.** Predicted docking score of Peficitinib against the viral protein panel.

| PDB  | Docking score | PDB  | Docking score | PDB           | Docking score |
|------|---------------|------|---------------|---------------|---------------|
| 3u7s | -12.70        | 2wr0 | -10.50        | 2wrg          | -10.00        |
| 3u7s | -12.60        | 4rw4 | -10.40        | 2wrg          | -10.00        |
| 3nxu | -11.50        | 4rw4 | -10.40        | 2wrg          | -10.00        |
| 3kqn | -11.30        | 4mk9 | -10.40        | 2wr1          | -10.00        |
| 3kqn | -11.30        | 3t3c | -10.40        | 2wr0          | -10.00        |
| 3kqn | -11.30        | 3kqh | -10.40        | 2bvo          | -10.00        |
| 4uo7 | -11.20        | 4qru | -10.30        | 4mkb          | -9.90         |
| 4uo7 | -11.20        | 4qru | -10.30        | 4mkb          | -9.90         |
| 4j4x | -11.20        | 4qrs | -10.30        | 4mka          | -9.90         |
| 4uo7 | -11.10        | 3hky | -10.30        | 4mk8          | -9.90         |
| 4uo7 | -11.10        | 3hky | -10.30        | 4mk7          | -9.90         |
| 4uo7 | -11.10        | 2i4d | -10.30        | 4j4v          | -9.90         |
| 4uo7 | -11.10        | 4wm8 | -10.20        | 4j4v          | -9.90         |
| 4o44 | -11.10        | 4uo5 | -10.20        | 4j4v          | -9.90         |
| 4a92 | -11.10        | 4pg2 | -10.20        | 4j4v          | -9.90         |
| 3lkh | -11.10        | 4j4w | -10.20        | 4j4v          | -9.90         |
| 4j4s | -11.00        | 3tie | -10.20        | 4gua          | -9.90         |
| 4j4s | -11.00        | 3tie | -10.20        | 3mlh          | -9.90         |
| 4a92 | -11.00        | 2i4w | -10.20        | 3cj4          | -9.90         |
| 4uo3 | -10.90        | 2i4u | -10.20        | 3cj2          | -9.90         |
| 4uo3 | -10.90        | 2axg | -10.20        | 3bev          | -9.90         |
| 4uo3 | -10.90        | 1syv | -10.20        | 2wrg          | -9.90         |
| 3hkw | -10.90        | 4rw8 | -10.10        | 2gec          | -9.90         |
| 3hkw | -10.80        | 4mka | -10.10        | 2gec          | -9.90         |
| 3hkw | -10.80        | 4mk8 | -10.10        | Main protease | -9.80         |
| 3cj0 | -10.80        | 4j4y | -10.10        | 4uo0          | -9.80         |
| 2i4v | -10.80        | 4j4u | -10.10        | 4uo0          | -9.80         |
| 4uo3 | -10.70        | 3h98 | -10.10        | 4uo0          | -9.80         |
| 4uo3 | -10.70        | 3h98 | -10.10        | 4uo0          | -9.80         |
| 3koa | -10.70        | 3bew | -10.10        | 4uo0          | -9.80         |
| 3cj0 | -10.70        | 2wr0 | -10.10        | 4uo0          | -9.80         |
| 2i4x | -10.70        | 1p9u | -10.10        | 4uo0          | -9.80         |
| 4uo5 | -10.60        | 1n5a | -10.10        | 4uo0          | -9.80         |
| 4g42 | -10.60        | 1idb | -10.10        | 4uo0          | -9.80         |
| 4e7a | -10.60        | 1ida | -10.10        | 4uo0          | -9.80         |
| 4e7a | -10.60        | 4rw9 | -10.00        | 4uo0          | -9.80         |
| 4bh0 | -10.60        | 4bac | -10.00        | 4unw          | -9.80         |
| 3t3c | -10.60        | 3vbo | -10.00        | 4unw          | -9.80         |
| 3cj5 | -10.60        | 3d23 | -10.00        | 4qhk          | -9.80         |
| 1quv | -10.60        | 3d23 | -10.00        | 4mk7          | -9.80         |
| 4uo5 | -10.50        | 3cj4 | -10.00        | 3tid          | -9.80         |
| 4qrs | -10.50        | 3cj2 | -10.00        | 3rwe          | -9.80         |
| 3cj3 | -10.50        | 3ciz | -10.00        | 3lkh          | -9.80         |
| 3cj3 | -10.50        | 2ygc | -10.00        | 4uo0          | -9.70         |
| 3ciz | -10.50        | 2ygc | -10.00        | 4uo0          | -9.70         |
| 2wr0 | -10.50        | 2wrg | -10.00        | 4uo0          | -9.70         |
|      |               |      |               | 4uo0          | -9.70         |

| PDB  | Docking score | PDB  | Docking score | PDB  | Docking score |
|------|---------------|------|---------------|------|---------------|
| 4uo0 | -9.70         | 3kql | -9.50         | 4e78 | -9.30         |
| 4uo0 | -9.70         | 3kql | -9.50         | 4cr0 | -9.30         |
| 4uo0 | -9.70         | 3kna | -9.50         | 4cqy | -9.30         |
| 4unw | -9.70         | 3fku | -9.50         | 4adf | -9.30         |
| 4rw6 | -9.70         | 3cpl | -9.50         | 4adf | -9.30         |
| 4g9f | -9.70         | 3bwa | -9.50         | 4adf | -9.30         |
| 4fqy | -9.70         | 2ygb | -9.50         | 4adf | -9.30         |
| 3vbr | -9.70         | 2ygb | -9.50         | 4adf | -9.30         |
| 3tid | -9.70         | 2xwy | -9.50         | 4adf | -9.30         |
| 3s11 | -9.70         | 2wre | -9.50         | 3s13 | -9.30         |
| 3rwe | -9.70         | 2wre | -9.50         | 3r4b | -9.30         |
| 3h2l | -9.70         | 2wre | -9.50         | 3r4b | -9.30         |
| 3h2l | -9.70         | 2wre | -9.50         | 3ok9 | -9.30         |
| 3cpl | -9.70         | 2wre | -9.50         | 3gsr | -9.30         |
| 3bwa | -9.70         | 2wre | -9.50         | 2wr0 | -9.30         |
| 3bw9 | -9.70         | 1klm | -9.50         | 1hhk | -9.30         |
| 2wrh | -9.70         | 1hhi | -9.50         | 1hhh | -9.30         |
| 2wr4 | -9.70         | 4uny | -9.40         | 5ajm | -9.20         |
| 2wr1 | -9.70         | 4q6r | -9.40         | 4uo2 | -9.20         |
| 2wr1 | -9.70         | 4q6r | -9.40         | 4uo2 | -9.20         |
| 2hjk | -9.70         | 4opa | -9.40         | 4uo2 | -9.20         |
| 1r6a | -9.70         | 4gag | -9.40         | 4unx | -9.20         |
| 4uo0 | -9.60         | 4gag | -9.40         | 4unx | -9.20         |
| 4rw7 | -9.60         | 4g43 | -9.40         | 4mds | -9.20         |
| 4mk9 | -9.60         | 4fqj | -9.40         | 4mds | -9.20         |
| 4jo8 | -9.60         | 3ztj | -9.40         | 4m8x | -9.20         |
| 4j4r | -9.60         | 3rwc | -9.40         | 4kpp | -9.20         |
| 4i2q | -9.60         | 3rwc | -9.40         | 4gaj | -9.20         |
| 4fqy | -9.60         | 3ku3 | -9.40         | 4gaj | -9.20         |
| 4e78 | -9.60         | 3ebj | -9.40         | 4fqr | -9.20         |
| 4cqy | -9.60         | 2wr2 | -9.40         | 4e5f | -9.20         |
| 3nf6 | -9.60         | 2wr2 | -9.40         | 4e5e | -9.20         |
| 3n0i | -9.60         | 2wr2 | -9.40         | 4cqu | -9.20         |
| 3cj5 | -9.60         | 1a41 | -9.40         | 4cqu | -9.20         |
| 2wa1 | -9.60         | 5ajm | -9.30         | 4cqu | -9.20         |
| 4pv9 | -9.50         | 5ajm | -9.30         | 4cqu | -9.20         |
| 4pv9 | -9.50         | 5ajm | -9.30         | 4cqu | -9.20         |
| 4o4g | -9.50         | 5ajm | -9.30         | 4cqu | -9.20         |
| 4mmu | -9.50         | 5ajm | -9.30         | 4bgx | -9.20         |
| 4k7f | -9.50         | 4uo2 | -9.30         | 3vbh | -9.20         |
| 4cqq | -9.50         | 4uo2 | -9.30         | 3v3m | -9.20         |
| 4cqq | -9.50         | 4uo2 | -9.30         | 3gsw | -9.20         |
| 4cqq | -9.50         | 4unx | -9.30         | 3gsw | -9.20         |
| 3rwd | -9.50         | 4pv9 | -9.30         | 3gso | -9.20         |
| 3rki | -9.50         | 4fqr | -9.30         | 3d0g | -9.20         |
| 3nf6 | -9.50         | 4fnk | -9.30         | 3avl | -9.20         |
| 3n0i | -9.50         | 4ej8 | -9.30         | 3ava | -9.20         |
| 3kql | -9.50         | 4ej8 | -9.30         | 3ava | -9.20         |

| PDB  | Docking score | PDB  | Docking score | PDB  | Docking score |
|------|---------------|------|---------------|------|---------------|
| 2zu5 | -9.20         | 4uo3 | -8.90         | 4co6 | -8.70         |
| 2hcs | -9.20         | 4m8y | -8.90         | 3zp2 | -8.70         |
| 4m8y | -9.10         | 3zp6 | -8.90         | 3zp0 | -8.70         |
| 4k7f | -9.10         | 3vcl | -8.90         | 3nf8 | -8.70         |
| 4fnk | -9.10         | 3se9 | -8.90         | 3alz | -8.70         |
| 4e5g | -9.10         | 3se8 | -8.90         | 2xra | -8.70         |
| 4bgx | -9.10         | 3se8 | -8.90         | 2wr7 | -8.70         |
| 3zp3 | -9.10         | 3rwg | -8.90         | 2vvx | -8.70         |
| 3v3m | -9.10         | 3ku5 | -8.90         | 2vvx | -8.70         |
| 3sdy | -9.10         | 3klv | -8.90         | 2vvw | -8.70         |
| 3sdy | -9.10         | 3iyw | -8.90         | 2oy0 | -8.70         |
| 3sdy | -9.10         | 3iyw | -8.90         | 2htw | -8.70         |
| 3rwi | -9.10         | 3iyw | -8.90         | 1v3b | -8.70         |
| 3rwh | -9.10         | 3i6l | -8.90         | 4lst | -8.60         |
| 3rwh | -9.10         | 3ggu | -8.90         | 4lsr | -8.60         |
| 3gsq | -9.10         | 1izi | -8.90         | 4iv3 | -8.60         |
| 3gso | -9.10         | 4mj1 | -8.80         | 4hkj | -8.60         |
| 3bw9 | -9.10         | 4m30 | -8.80         | 4dag | -8.60         |
| 2hu4 | -9.10         | 4m8x | -8.80         | 4cqz | -8.60         |
| 2hu4 | -9.10         | 4jb9 | -8.80         | 3zpa | -8.60         |
| 2hu4 | -9.10         | 4i2p | -8.80         | 3ku6 | -8.60         |
| 1v3d | -9.10         | 4fp8 | -8.80         | 3ku6 | -8.60         |
| 1v3d | -9.10         | 4fp8 | -8.80         | 3gsq | -8.60         |
| 4uo3 | -9.00         | 4ffz | -8.80         | 2vvw | -8.60         |
| 4uo3 | -9.00         | 4cqs | -8.80         | 2hty | -8.60         |
| 4uo3 | -9.00         | 4cqs | -8.80         | 1v3b | -8.60         |
| 4unx | -9.00         | 4cqp | -8.80         | 1b53 | -8.60         |
| 4qhn | -9.00         | 4cqp | -8.80         | 4fqi | -8.50         |
| 4mj0 | -9.00         | 4cqp | -8.80         | 4ejl | -8.50         |
| 4lsu | -9.00         | 4cqp | -8.80         | 4e5j | -8.50         |
| 4ejl | -9.00         | 4cqp | -8.80         | 4cqz | -8.50         |
| 4cqr | -9.00         | 4cqp | -8.80         | 4bh1 | -8.50         |
| 4cqr | -9.00         | 4bgw | -8.80         | 4bh1 | -8.50         |
| 4cew | -9.00         | 4bgw | -8.80         | 4bh1 | -8.50         |
| 3nf8 | -9.00         | 3zpb | -8.80         | 4bgz | -8.50         |
| 3nf8 | -9.00         | 3zpb | -8.80         | 3zp1 | -8.50         |
| 3nf7 | -9.00         | 3vcl | -8.80         | 3u82 | -8.50         |
| 3nf7 | -9.00         | 3rwg | -8.80         | 3u82 | -8.50         |
| 3nf7 | -9.00         | 3ku5 | -8.80         | 3nwa | -8.50         |
| 3nf7 | -9.00         | 3ku3 | -8.80         | 3nwa | -8.50         |
| 3iyw | -9.00         | 3iyw | -8.80         | 3nfa | -8.50         |
| 3iyw | -9.00         | 3b0w | -8.80         | 3d0h | -8.50         |
| 3ggu | -9.00         | 1v3e | -8.80         | 2uv0 | -8.50         |
| 3avj | -9.00         | 1v3e | -8.80         | 2uv0 | -8.50         |
| 2hu4 | -9.00         | 4uo6 | -8.70         | 2uv0 | -8.50         |
| 2bvp | -9.00         | 4kps | -8.70         | 2uv0 | -8.50         |
| 1hhj | -9.00         | 4i7f | -8.70         | 2uv0 | -8.50         |
| 4uo3 | -8.90         | 4i2p | -8.70         | 2uv0 | -8.50         |



| PDB  | Docking score | PDB  | Docking score | PDB  | Docking score |
|------|---------------|------|---------------|------|---------------|
| 2uv0 | -8.50         | 4mg3 | -8.10         | 4dkq | -7.60         |
| 2uv0 | -8.50         | 4i2q | -8.10         | 4dkp | -7.60         |
| 2uv0 | -8.50         | 4bgy | -8.10         | 3ztn | -7.60         |
| 2uv0 | -8.50         | 3lqa | -8.10         | 3vbf | -7.60         |
| 2uv0 | -8.50         | 3avf | -8.10         | 3vbf | -7.60         |
| 2uv0 | -8.50         | 2x83 | -8.10         | 3su6 | -7.60         |
| 2hu0 | -8.50         | 2x83 | -8.10         | 3rwi | -7.60         |
| 2ht5 | -8.50         | 2htu | -8.10         | 3mj5 | -7.60         |
| 1sk7 | -8.50         | 2gvf | -8.10         | 3mj5 | -7.60         |
| 1rzj | -8.50         | 4wm7 | -8.00         | 3gsw | -7.60         |
| 4g8g | -8.40         | 4lsv | -8.00         | 2q7c | -7.60         |
| 4g8g | -8.40         | 4eq0 | -8.00         | 2c36 | -7.60         |
| 4eq0 | -8.40         | 4bh4 | -8.00         | 4qru | -7.50         |
| 4e76 | -8.40         | 4bh2 | -8.00         | 4pv8 | -7.50         |
| 3nfa | -8.40         | 4bh2 | -8.00         | 4lsp | -7.50         |
| 2zu4 | -8.40         | 3oah | -8.00         | 4f3z | -7.50         |
| 2mgu | -8.40         | 3nwf | -8.00         | 4dgd | -7.50         |
| 1izh | -8.40         | 3nfa | -8.00         | 4cdu | -7.50         |
| 4uo6 | -8.30         | 3nfa | -8.00         | 4cdq | -7.50         |
| 4j6r | -8.30         | 3nf9 | -8.00         | 3uf5 | -7.50         |
| 4e5l | -8.30         | 3avn | -8.00         | 3avc | -7.50         |
| 3nf9 | -8.30         | 3avg | -8.00         | 3avb | -7.50         |
| 3nf8 | -8.30         | 3alx | -8.00         | 3avb | -7.50         |
| 3avh | -8.30         | 2wh6 | -8.00         | 3ava | -7.50         |
| 2z35 | -8.30         | 2oy0 | -8.00         | 2iph | -7.50         |
| 2xi5 | -8.30         | 2ghw | -8.00         | 2iph | -7.50         |
| 2ge7 | -8.30         | 4gve | -7.90         | 1rq9 | -7.50         |
| 1v2i | -8.30         | 4egt | -7.90         | 4oyd | -7.40         |
| 1v2i | -8.30         | 4cqx | -7.90         | 4mms | -7.40         |
| 1rv7 | -8.30         | 3o4l | -7.90         | 4i32 | -7.40         |
| 1r6a | -8.30         | 3i6g | -7.90         | 4i31 | -7.40         |
| 1pk0 | -8.30         | 2wrc | -7.90         | 4i31 | -7.40         |
| 1b50 | -8.30         | 2iph | -7.90         | 4f3i | -7.40         |
| 4mj1 | -8.20         | 2hcn | -7.90         | 4e92 | -7.40         |
| 4lsu | -8.20         | 1rzk | -7.90         | 4e92 | -7.40         |
| 2xi5 | -8.20         | 4qrt | -7.80         | 4cqy | -7.40         |
| 2wrf | -8.20         | 4fb3 | -7.80         | 4cey | -7.40         |
| 1v3c | -8.20         | 3nf9 | -7.80         | 3oah | -7.40         |
| 1v3c | -8.20         | 3nf9 | -7.80         | 3nf6 | -7.40         |
| 1v3c | -8.20         | 3gsv | -7.80         | 3nf6 | -7.40         |
| 1v3c | -8.20         | 1oop | -7.80         | 3avl | -7.40         |
| 1p9s | -8.20         | 4mmr | -7.70         | 3ava | -7.40         |
| 4qhl | -8.10         | 4g9f | -7.70         | 2q7c | -7.40         |
| 4mza | -8.10         | 4fvu | -7.70         | 2q7c | -7.40         |
| 4mza | -8.10         | 3gsv | -7.70         | 2lsp | -7.40         |
| 4mj0 | -8.10         | 3avk | -7.70         | 2iph | -7.40         |
| 4mgu | -8.10         | 2vvy | -7.70         | 2ge8 | -7.40         |
| 4mg3 | -8.10         | 4oph | -7.60         | 2c36 | -7.40         |

| PDB      | Docking score | PDB       | Docking score | PDB  | Docking score |
|----------|---------------|-----------|---------------|------|---------------|
| 4qrt     | -7.30         | 2wr3      | -7.00         | 3sit | -6.60         |
| 4fqi     | -7.30         | 4gye      | -6.90         | 3sit | -6.60         |
| 4f3i     | -7.30         | 4ejd      | -6.90         | 3gzf | -6.60         |
| 4cdw     | -7.30         | 4dgd      | -6.90         | 2zol | -6.60         |
| 3su1     | -7.30         | 4dgc      | -6.90         | 2me2 | -6.60         |
| 3avb     | -7.30         | 4dgc      | -6.90         | 4lkj | -6.50         |
| 3avb     | -7.30         | 4dgc      | -6.90         | 4g9z | -6.50         |
| 2zty     | -7.30         | 4dgc      | -6.90         | 4g9z | -6.50         |
| 2ghv     | -7.30         | 4dgc      | -6.90         | 4fqv | -6.50         |
| 2c7u     | -7.30         | 4dgc      | -6.90         | 4ep3 | -6.50         |
| 4pv8     | -7.20         | 3sis      | -6.90         | 4ep3 | -6.50         |
| 4fqi     | -7.20         | 2xpx      | -6.90         | 4ejd | -6.50         |
| 4dko     | -7.20         | 2g69      | -6.90         | 4e91 | -6.50         |
| 3w39     | -7.20         | 2ca1      | -6.90         | 4dmn | -6.50         |
| 3sud     | -7.20         | 4lss      | -6.80         | 4dkr | -6.50         |
| 3ro5     | -7.20         | 4ejd      | -6.80         | 4bh3 | -6.50         |
| 3pqy     | -7.20         | 4e5i      | -6.80         | 4bh3 | -6.50         |
| 2yka     | -7.20         | 2wh6      | -6.80         | 4bh3 | -6.50         |
| 1yh3     | -7.20         | 2g69      | -6.80         | 4bh3 | -6.50         |
| 1n59     | -7.20         | Spike RBD | -6.70         | 3vie | -6.50         |
| Papain   | -7.10         | 4oyd      | -6.70         | 3sv6 | -6.50         |
| protease | -7.10         | 4jpk      | -6.70         | 3su5 | -6.50         |
| 4qrt     | -7.10         | 4gv9      | -6.70         | 3su5 | -6.50         |
| 4iv1     | -7.10         | 4ffy      | -6.70         | 3su5 | -6.50         |
| 4cdx     | -7.10         | 4dgb      | -6.70         | 3su0 | -6.50         |
| 4b8e     | -7.10         | 4dgb      | -6.70         | 2ztz | -6.50         |
| 3gsu     | -7.10         | 4b8e      | -6.70         | 2xze | -6.50         |
| 3gsu     | -7.10         | 4b4n      | -6.70         | 1sys | -6.50         |
| 3avh     | -7.10         | 4b4n      | -6.70         | 1qr8 | -6.50         |
| 3a07     | -7.10         | 3rkc      | -6.70         | 4nwl | -6.40         |
| 1qz8     | -7.10         | 3nw8      | -6.70         | 4fqv | -6.40         |
| 4bh4     | -7.00         | 3m5h      | -6.70         | 4eee | -6.40         |
| 4bh4     | -7.00         | 3kmq      | -6.70         | 3su6 | -6.40         |
| 4bh4     | -7.00         | 2yol      | -6.70         | 3su4 | -6.40         |
| 3su2     | -7.00         | 2bvq      | -6.70         | 3su4 | -6.40         |
| 3su2     | -7.00         | 1rpi      | -6.70         | 3su1 | -6.40         |
| 3su2     | -7.00         | 1rpi      | -6.70         | 3ifu | -6.40         |
| 3su0     | -7.00         | 4jpk      | -6.60         | 2yhf | -6.40         |
| 3sis     | -7.00         | 4i33      | -6.60         | 2v6q | -6.40         |
| 3rwj     | -7.00         | 4dmn      | -6.60         | 1f08 | -6.40         |
| 3rwj     | -7.00         | 4b8e      | -6.60         | 4gzf | -6.30         |
| 3rwf     | -7.00         | 3sv8      | -6.60         | 4gzf | -6.30         |
| 3gsx     | -7.00         | 3su3      | -6.60         | 4gv3 | -6.30         |
| 3gsx     | -7.00         | 3su3      | -6.60         | 4gv3 | -6.30         |
| 3gsr     | -7.00         | 3sit      | -6.60         | 4ejd | -6.30         |
| 3avg     | -7.00         | 3sit      | -6.60         | 4ejd | -6.30         |
| 2zu1     | -7.00         | 3sit      | -6.60         | 4ejd | -6.30         |
| 2xya     | -7.00         | 3sit      | -6.60         | 3sv9 | -6.30         |

| PDB  | Docking score | PDB  | Docking score | PDB  | Docking score |
|------|---------------|------|---------------|------|---------------|
| 3sv9 | -6.30         | 2q5u | -5.80         | 4g8i | -4.80         |
| 3rwf | -6.30         | 2q5u | -5.80         | 3zd0 | -4.80         |
| 3p8n | -6.30         | 2q5u | -5.80         | 3avn | -4.80         |
| 3b71 | -6.30         | 4mze | -5.70         | 2vxj | -4.80         |
| 3b71 | -6.30         | 4mze | -5.70         | 4ipz | -4.70         |
| 2xpx | -6.30         | 4mmv | -5.70         | 4ipz | -4.70         |
| 2vxw | -6.30         | 4ejr | -5.70         | 4g9d | -4.70         |
| 4nwk | -6.20         | 2x9m | -5.70         | 4dga | -4.70         |
| 4jpi | -6.20         | 2q7c | -5.70         | 4ep2 | -4.60         |
| 4jki | -6.20         | 2c3a | -5.70         | 4ep2 | -4.60         |
| 3sv6 | -6.20         | 4mod | -5.60         | 3j23 | -4.50         |
| 3suf | -6.20         | 4mod | -5.60         | 3j22 | -4.50         |
| 3sud | -6.20         | 4ejd | -5.60         | 4ipz | -4.00         |
| 3kms | -6.20         | 3vtt | -5.60         | 3vie | -4.00         |
| 3gsn | -6.20         | 3uqi | -5.60         | 4uo4 | -3.50         |
| 3bwa | -6.20         | 3sue | -5.60         | 4uo8 | -3.30         |
| 4mmt | -6.10         | 3avc | -5.60         | 4ipz | -3.30         |
| 4epj | -6.10         | 4ejk | -5.50         | 4eqj | -3.00         |
| 3u83 | -6.10         | 4adq | -5.50         | 4ipz | -2.90         |
| 3u83 | -6.10         | 3sug | -5.50         | 4qhm | -2.80         |
| 3sv7 | -6.10         | 3avk | -5.50         | 4ipz | -2.80         |
| 3s12 | -6.10         | 4ekx | -5.40         | 4ipz | -2.70         |
| 3d0i | -6.10         | 4c1w | -5.40         | 4ipz | -2.60         |
| 2wfo | -6.10         | 3i6k | -5.40         | 4ipz | -2.40         |
| 2wfo | -6.10         | 3giv | -5.40         | 4epj | -1.80         |
| 2axf | -6.10         | 3alw | -5.40         | 2l3h | -1.70         |
| 2axf | -6.10         | 2me4 | -5.40         | 4dge | -1.60         |
| 4u6h | -6.00         | 2m3l | -5.40         | 2zsv | -1.10         |
| 4nwk | -6.00         | 2l2f | -5.40         | 2zsv | -1.10         |
| 4ejd | -6.00         | 4g9d | -5.30         | 3m5i | -1.00         |
| 4ejd | -6.00         | 4dga | -5.30         | 4gu4 | -0.90         |
| 3sv7 | -6.00         | 1qr9 | -5.30         | 4gu4 | -0.90         |
| 3sug | -6.00         | 4c1w | -5.20         | 4gu4 | -0.90         |
| 2yhh | -6.00         | 4adq | -5.20         | 4gu4 | -0.90         |
| 2xze | -6.00         | 3vtt | -5.20         | 4gu4 | -0.90         |
| 3uqi | -5.90         | 1z8r | -5.20         | 4gu4 | -0.90         |
| 3p8o | -5.90         | 3kqk | -5.10         | 4e0r | -0.70         |
| 3avj | -5.90         | 2mkr | -5.10         | 4gu3 | -0.40         |
| 2y1s | -5.90         | 1zsd | -5.10         | 4gu3 | -0.40         |
| 2q5u | -5.90         | 2zu3 | -5.00         | 4gu3 | -0.40         |
| 2c86 | -5.90         | 2me3 | -5.00         | 4gu3 | -0.40         |
| 4gye | -5.80         | 4ipz | -4.90         | 4gu3 | -0.40         |
| 4ejk | -5.80         | 4ejk | -4.90         | 4gu3 | -0.30         |
| 2yol | -5.80         | 2m3m | -4.90         | 4gu3 | -0.30         |
| 2q7c | -5.80         | 2hfz | -4.90         | 4gu3 | -0.30         |
| 2q7c | -5.80         | 4ipz | -4.80         | 4gu3 | -0.30         |
| 2q5u | -5.80         | 4ipz | -4.80         | 4gu3 | -0.30         |
| 2q5u | -5.80         | 4g8i | -4.80         | 4gu3 | -0.30         |

| <b>PDB</b> | <b>Docking score</b> |
|------------|----------------------|
| 4gu3       | -0.30                |

| <b>PDB</b> | <b>Docking score</b> |
|------------|----------------------|
| 4fqm       | -0.30                |

**Table S 11.** Predicted docking score of Dihydroergotamine against the viral protein panel.

| <b>PDB</b> | <b>Docking score</b> | <b>PDB</b> | <b>Docking score</b> | <b>PDB</b> | <b>Docking score</b> |
|------------|----------------------|------------|----------------------|------------|----------------------|
| 3nxu       | -13.00               | 2wrg       | -10.90               | 3lkh       | -10.50               |
| 3kqn       | -11.90               | 2wrg       | -10.90               | 3hky       | -10.50               |
| 3kqn       | -11.90               | 2wrg       | -10.90               | 3hky       | -10.50               |
| 3kqn       | -11.90               | 2wrg       | -10.90               | 3hkw       | -10.50               |
| 3kqh       | -11.80               | 4rw9       | -10.80               | 3hkw       | -10.50               |
| 3iyw       | -11.80               | 4qru       | -10.80               | 3cj4       | -10.50               |
| 3iyw       | -11.80               | 4mk8       | -10.80               | 2wr1       | -10.50               |
| 3iyw       | -11.80               | 4mk8       | -10.80               | 2i4u       | -10.50               |
| 3iyw       | -11.80               | 4fnk       | -10.80               | 1hhk       | -10.50               |
| 3iyw       | -11.80               | 3tid       | -10.80               | 4mkb       | -10.40               |
| 3iyw       | -11.80               | 3h2l       | -10.80               | 4mkb       | -10.40               |
| 2wr0       | -11.40               | 3bwa       | -10.80               | 4mka       | -10.40               |
| 2wr0       | -11.40               | 2hjk       | -10.80               | 4mka       | -10.40               |
| 2wr0       | -11.40               | 2bvp       | -10.80               | 4mk7       | -10.40               |
| 2wr0       | -11.40               | 2axg       | -10.80               | 4mk7       | -10.40               |
| 4uo3       | -11.30               | 1syv       | -10.80               | 4k7f       | -10.40               |
| 4uo3       | -11.30               | 4rw8       | -10.70               | 4g9f       | -10.40               |
| 4uo3       | -11.30               | 4qrs       | -10.70               | 4fnk       | -10.40               |
| 3vbr       | -11.30               | 4o44       | -10.70               | 4e78       | -10.40               |
| 2wr0       | -11.30               | 4j4x       | -10.70               | 4e78       | -10.40               |
| 4g42       | -11.10               | 3gso       | -10.70               | 4a92       | -10.40               |
| 3vbo       | -11.10               | 3cpl       | -10.70               | 4a92       | -10.40               |
| 3u7s       | -11.10               | 3cj3       | -10.70               | 3ztj       | -10.40               |
| 3u7s       | -11.10               | 2ygb       | -10.70               | 3i6l       | -10.40               |
| 3cj2       | -11.10               | 1n5a       | -10.70               | 3d23       | -10.40               |
| 4mk9       | -11.00               | 4uo5       | -10.60               | 3d23       | -10.40               |
| 4mk9       | -11.00               | 4pg2       | -10.60               | 3cj4       | -10.40               |
| 4fqr       | -11.00               | 4j4y       | -10.60               | 3cj0       | -10.40               |
| 4e7a       | -11.00               | 4bh0       | -10.60               | 3b0w       | -10.40               |
| 4e7a       | -11.00               | 3lkh       | -10.60               | 2wr4       | -10.40               |
| 3vcl       | -11.00               | 3cpl       | -10.60               | 2wr1       | -10.40               |
| 3vcl       | -11.00               | 3cj5       | -10.60               | 2wr1       | -10.40               |
| 3tie       | -11.00               | 3cj5       | -10.60               | 1hhi       | -10.40               |
| 3tie       | -11.00               | 3cj3       | -10.60               | 4uo3       | -10.30               |
| 3h98       | -11.00               | 3cj0       | -10.60               | 4uo2       | -10.30               |
| 3cj2       | -11.00               | 3ciz       | -10.60               | 4uo2       | -10.30               |
| 3bwa       | -11.00               | 3bw9       | -10.60               | 4uo2       | -10.30               |
| 2hcs       | -11.00               | 2ygc       | -10.60               | 4uo2       | -10.30               |
| 2bvo       | -11.00               | 2ygc       | -10.60               | 4uo2       | -10.30               |
| 1r6a       | -11.00               | 2ygb       | -10.60               | 4uo2       | -10.30               |
| 4qru       | -10.90               | 2htu       | -10.60               | 3rwe       | -10.30               |
| 4qrs       | -10.90               | 1quv       | -10.60               | 3koa       | -10.30               |
| 4fqr       | -10.90               | 4uo5       | -10.50               | 3kna       | -10.30               |
| 3h98       | -10.90               | 4uo5       | -10.50               | 3gsw       | -10.30               |
| 3h2l       | -10.90               | 4j4w       | -10.50               | 3ciz       | -10.30               |
| 2wrg       | -10.90               | 3tid       | -10.50               | 3bw9       | -10.30               |

| PDB  | Docking score | PDB  | Docking score | PDB  | Docking score |
|------|---------------|------|---------------|------|---------------|
| 2wrh | -10.30        | 4lsu | -10.00        | 3sdy | -9.80         |
| 2i4v | -10.30        | 4g43 | -10.00        | 3sdy | -9.80         |
| 2gec | -10.30        | 4cdw | -10.00        | 3rwc | -9.80         |
| 2gec | -10.30        | 3se8 | -10.00        | 3ggg | -9.80         |
| 1v2i | -10.30        | 3se8 | -10.00        | 2wa1 | -9.80         |
| 1v2i | -10.30        | 3rwi | -10.00        | 2ht5 | -9.80         |
| 1ida | -10.30        | 3rwh | -10.00        | 1v3b | -9.80         |
| 4wm8 | -10.20        | 3rwg | -10.00        | 1p9u | -9.80         |
| 4uo7 | -10.20        | 3rwg | -10.00        | 4rw7 | -9.70         |
| 4uo7 | -10.20        | 3rwd | -10.00        | 4lsr | -9.70         |
| 4uo7 | -10.20        | 3gsq | -10.00        | 4j4v | -9.70         |
| 4uo7 | -10.20        | 3gsq | -10.00        | 4j4v | -9.70         |
| 4uo7 | -10.20        | 3gso | -10.00        | 4j4v | -9.70         |
| 4uo7 | -10.20        | 3fku | -10.00        | 4j4v | -9.70         |
| 4uo3 | -10.20        | 2vww | -10.00        | 4j4v | -9.70         |
| 4uny | -10.20        | 2i4d | -10.00        | 4j4u | -9.70         |
| 4pv9 | -10.20        | 1v3d | -10.00        | 4j4s | -9.70         |
| 4pv9 | -10.20        | 1v3d | -10.00        | 4j4s | -9.70         |
| 4k7f | -10.20        | 1hhj | -10.00        | 4i2p | -9.70         |
| 4gua | -10.20        | 4uo0 | -9.90         | 4gaj | -9.70         |
| 4cew | -10.20        | 4uo0 | -9.90         | 4gag | -9.70         |
| 3rwe | -10.20        | 4uo0 | -9.90         | 4gag | -9.70         |
| 3hkw | -10.20        | 4uo0 | -9.90         | 4cey | -9.70         |
| 2i4w | -10.20        | 4uo0 | -9.90         | 2vww | -9.70         |
| 4uo0 | -10.10        | 4uo0 | -9.90         | 2hty | -9.70         |
| 4uo0 | -10.10        | 4uo0 | -9.90         | 4unw | -9.60         |
| 4uo0 | -10.10        | 4uo0 | -9.90         | 4unw | -9.60         |
| 4m8x | -10.10        | 4uo0 | -9.90         | 4unw | -9.60         |
| 4e5e | -10.10        | 4uo0 | -9.90         | 4mza | -9.60         |
| 4cdu | -10.10        | 4uo0 | -9.90         | 3s11 | -9.60         |
| 3rwh | -10.10        | 4rw4 | -9.90         | 3ava | -9.60         |
| 3r4b | -10.10        | 4opa | -9.90         | 3ava | -9.60         |
| 3ok9 | -10.10        | 4cdx | -9.90         | 1pk0 | -9.60         |
| 3kql | -10.10        | 4bac | -9.90         | 1izh | -9.60         |
| 3kql | -10.10        | 3sdy | -9.90         | 4uo3 | -9.50         |
| 3kql | -10.10        | 3rwc | -9.90         | 4uo3 | -9.50         |
| 3gsw | -10.10        | 3r4b | -9.90         | 4uo3 | -9.50         |
| 3bev | -10.10        | 3n0i | -9.90         | 4uo3 | -9.50         |
| 2wr2 | -10.10        | 3n0i | -9.90         | 4uo3 | -9.50         |
| 2wr2 | -10.10        | 3gsr | -9.90         | 4rw6 | -9.50         |
| 2wr2 | -10.10        | 3bew | -9.90         | 4mza | -9.50         |
| 1idb | -10.10        | 4unx | -9.80         | 4mms | -9.50         |
| 1a41 | -10.10        | 4unx | -9.80         | 4m8y | -9.50         |
| 4uo0 | -10.00        | 4unx | -9.80         | 4m8y | -9.50         |
| 4uo0 | -10.00        | 4unx | -9.80         | 4fqy | -9.50         |
| 4uo0 | -10.00        | 4qhn | -9.80         | 3zp1 | -9.50         |
| 4uo0 | -10.00        | 4lst | -9.80         | 3t3c | -9.50         |
| 4lsu | -10.00        | 4cdq | -9.80         | 3rki | -9.50         |

| PDB       | Docking score | PDB      | Docking score | PDB  | Docking score |
|-----------|---------------|----------|---------------|------|---------------|
| 3ebj      | -9.50         | 4fqi     | -9.20         | 3zp2 | -9.00         |
| 2i4x      | -9.50         | 4ffz     | -9.20         | 3zp0 | -9.00         |
| 2hu4      | -9.50         | 4dgd     | -9.20         | 3nwa | -9.00         |
| 2hu4      | -9.50         | 4cqy     | -9.20         | 3nwa | -9.00         |
| 2hu4      | -9.50         | 4cqs     | -9.20         | 3mlh | -9.00         |
| 2hu4      | -9.50         | 4bgz     | -9.20         | 3ku3 | -9.00         |
| 1v3c      | -9.50         | 3zp6     | -9.20         | 3ku3 | -9.00         |
| Spike RBD | -9.40         | 3o4l     | -9.20         | 3klv | -9.00         |
| 4j4r      | -9.40         | 2oy0     | -9.20         | 3ggg | -9.00         |
| 4fqy      | -9.40         | 2oy0     | -9.20         | 3alx | -9.00         |
| 4fqv      | -9.40         | 5ajm     | -9.10         | 2xra | -9.00         |
| 4ej8      | -9.40         | 5ajm     | -9.10         | 2wrf | -9.00         |
| 4ej8      | -9.40         | 5ajm     | -9.10         | 4mj1 | -8.90         |
| 4e5g      | -9.40         | 5ajm     | -9.10         | 4jo8 | -8.90         |
| 4e5f      | -9.40         | 5ajm     | -9.10         | 4ejl | -8.90         |
| 4dag      | -9.40         | 5ajm     | -9.10         | 4egt | -8.90         |
| 4cqu      | -9.40         | 4q6r     | -9.10         | 4cqu | -8.90         |
| 4adf      | -9.40         | 4q6r     | -9.10         | 4cqu | -8.90         |
| 4adf      | -9.40         | 4mmu     | -9.10         | 4cqr | -8.90         |
| 4adf      | -9.40         | 4mj0     | -9.10         | 4cqr | -8.90         |
| 4adf      | -9.40         | 4kps     | -9.10         | 4cqq | -8.90         |
| 4adf      | -9.40         | 4i2p     | -9.10         | 4cqq | -8.90         |
| 4adf      | -9.40         | 4g8g     | -9.10         | 4cqq | -8.90         |
| 3t3c      | -9.40         | 4g8g     | -9.10         | 4cqp | -8.90         |
| 2xwy      | -9.40         | 4e76     | -9.10         | 4cqp | -8.90         |
| 1v3c      | -9.40         | 4cr0     | -9.10         | 4cqp | -8.90         |
| 1sk7      | -9.40         | 4cqy     | -9.10         | 4cqp | -8.90         |
| 1klm      | -9.40         | 4cqs     | -9.10         | 3ztn | -8.90         |
| 1hhh      | -9.40         | 4bgx     | -9.10         | 3nf9 | -8.90         |
| 4o4g      | -9.30         | 4bgx     | -9.10         | 3nf9 | -8.90         |
| 4mj1      | -9.30         | 3zpb     | -9.10         | 3nf7 | -8.90         |
| 4m8x      | -9.30         | 3zpb     | -9.10         | 3nf7 | -8.90         |
| 4jb9      | -9.30         | 2zu5     | -9.10         | 3nf6 | -8.90         |
| 4gaj      | -9.30         | 2wr7     | -9.10         | 3nf6 | -8.90         |
| 4cqu      | -9.30         | Main     | -9.00         | 3d0h | -8.90         |
| 3alz      | -9.30         | protease | -9.00         | 3avg | -8.90         |
| 2wre      | -9.30         | 4qhk     | -9.00         | 2htw | -8.90         |
| 2wre      | -9.30         | 4mmr     | -9.00         | 2c36 | -8.90         |
| 2wre      | -9.30         | 4i7f     | -9.00         | 2c36 | -8.90         |
| 2wre      | -9.30         | 4i2q     | -9.00         | 4pv9 | -8.80         |
| 2wre      | -9.30         | 4fvu     | -9.00         | 4gve | -8.80         |
| 2wre      | -9.30         | 4fp8     | -9.00         | 4cqz | -8.80         |
| 1izi      | -9.30         | 4fp8     | -9.00         | 4cqz | -8.80         |
| 4rw4      | -9.20         | 4ejl     | -9.00         | 4cqu | -8.80         |
| 4lsv      | -9.20         | 4cqy     | -9.00         | 4cqu | -8.80         |
| 4kpq      | -9.20         | 4cqp     | -9.00         | 4cqp | -8.80         |
| 4fqv      | -9.20         | 4co6     | -9.00         | 4bgw | -8.80         |
| 4fqj      | -9.20         | 3zpa     | -9.00         | 3v3m | -8.80         |

| PDB  | Docking score | PDB  | Docking score | PDB  | Docking score |
|------|---------------|------|---------------|------|---------------|
| 3v3m | -8.80         | 3nf7 | -8.50         | 4bh3 | -8.20         |
| 3avh | -8.80         | 3nf7 | -8.50         | 4bh3 | -8.20         |
| 2vvx | -8.80         | 3avl | -8.50         | 4bh3 | -8.20         |
| 2vvx | -8.80         | 3avb | -8.50         | 4bh3 | -8.20         |
| 2hu0 | -8.80         | 3avb | -8.50         | 3vbh | -8.20         |
| 1v3e | -8.80         | 2z35 | -8.50         | 3sit | -8.20         |
| 1p9s | -8.80         | 2x83 | -8.50         | 3rwj | -8.20         |
| 4uo6 | -8.70         | 2wr3 | -8.50         | 3rwj | -8.20         |
| 4uo6 | -8.70         | 1v3e | -8.50         | 3lqa | -8.20         |
| 4m30 | -8.70         | 1rzj | -8.50         | 3i6g | -8.20         |
| 4bh1 | -8.70         | 4pv8 | -8.40         | 3gsr | -8.20         |
| 4bgw | -8.70         | 4mgu | -8.40         | 3d0g | -8.20         |
| 3nfa | -8.70         | 4i32 | -8.40         | 3avj | -8.20         |
| 3nfa | -8.70         | 4dgd | -8.40         | 3ava | -8.20         |
| 3nf8 | -8.70         | 3nwf | -8.40         | 3ava | -8.20         |
| 3nf8 | -8.70         | 3nf9 | -8.40         | 2xi5 | -8.20         |
| 3ku6 | -8.70         | 3mj5 | -8.40         | 2xi5 | -8.20         |
| 3ku6 | -8.70         | 3mj5 | -8.40         | 4pv8 | -8.10         |
| 3avn | -8.70         | 3ku5 | -8.40         | 4f3z | -8.10         |
| 3avl | -8.70         | 3gsx | -8.40         | 3vbf | -8.10         |
| 2x83 | -8.70         | 3gsx | -8.40         | 3vbf | -8.10         |
| 2wrc | -8.70         | 3gsv | -8.40         | 3sit | -8.10         |
| 2iph | -8.70         | 3gsv | -8.40         | 3sit | -8.10         |
| 2ghv | -8.70         | 2mgu | -8.40         | 3sit | -8.10         |
| 1r6a | -8.70         | 1rv7 | -8.40         | 3sit | -8.10         |
| 4wm7 | -8.60         | 1oop | -8.40         | 3ro5 | -8.10         |
| 4qhl | -8.60         | 4mg3 | -8.30         | 3oah | -8.10         |
| 4mj0 | -8.60         | 4mds | -8.30         | 3nf6 | -8.10         |
| 4g9f | -8.60         | 4i31 | -8.30         | 3nf6 | -8.10         |
| 4fqi | -8.60         | 4fb3 | -8.30         | 2ghw | -8.10         |
| 4fqi | -8.60         | 4e5l | -8.30         | 4i2q | -8.00         |
| 4bh1 | -8.60         | 3su0 | -8.30         | 4gv3 | -8.00         |
| 4bh1 | -8.60         | 3nf9 | -8.30         | 3uqi | -8.00         |
| 3zp3 | -8.60         | 3ku5 | -8.30         | 3uqi | -8.00         |
| 3s13 | -8.60         | 3gsu | -8.30         | 3su6 | -8.00         |
| 3nfa | -8.60         | 3gsu | -8.30         | 3avb | -8.00         |
| 3nf8 | -8.60         | 3avf | -8.30         | 2zty | -8.00         |
| 3nf8 | -8.60         | 1v3c | -8.30         | 2me2 | -8.00         |
| 2iph | -8.60         | 1v3c | -8.30         | 2lsp | -8.00         |
| 2iph | -8.60         | 4mg3 | -8.20         | 2ge8 | -8.00         |
| 1b53 | -8.60         | 4mds | -8.20         | 1v3b | -8.00         |
| 4qru | -8.50         | 4i31 | -8.20         | 1n59 | -8.00         |
| 4bgy | -8.50         | 4dgc | -8.20         | 4uo8 | -7.90         |
| 3u82 | -8.50         | 4dgc | -8.20         | 4gv3 | -7.90         |
| 3u82 | -8.50         | 4dgc | -8.20         | 4f3i | -7.90         |
| 3su0 | -8.50         | 4dgc | -8.20         | 4eq0 | -7.90         |
| 3se9 | -8.50         | 4dgc | -8.20         | 4bh2 | -7.90         |
| 3nfa | -8.50         | 4dgc | -8.20         | 4bh2 | -7.90         |



| PDB                | Docking score | PDB  | Docking score | PDB  | Docking score |
|--------------------|---------------|------|---------------|------|---------------|
| 3su2               | -7.90         | 2q7c | -7.50         | 4gv9 | -7.00         |
| 3su2               | -7.90         | 2q7c | -7.50         | 4g9z | -7.00         |
| 3avh               | -7.90         | 2q7c | -7.50         | 4ejk | -7.00         |
| 2zol               | -7.90         | 2iph | -7.50         | 3su2 | -7.00         |
| 2hcn               | -7.90         | 2c7u | -7.50         | 3kmq | -7.00         |
| 4oph               | -7.80         | 1qz8 | -7.50         | 2xze | -7.00         |
| 4f3i               | -7.80         | 4iv1 | -7.40         | 2q7c | -7.00         |
| 3sit               | -7.80         | 4hkj | -7.40         | 2q7c | -7.00         |
| 3avc               | -7.80         | 4gzf | -7.40         | 2q7c | -7.00         |
| 3avb               | -7.80         | 4gzf | -7.40         | 1rq9 | -7.00         |
| 2xya               | -7.80         | 4eee | -7.40         | 4oyd | -6.90         |
| 2uv0               | -7.80         | 4dkq | -7.40         | 4lkj | -6.90         |
| 2uv0               | -7.80         | 3sv8 | -7.40         | 4jpk | -6.90         |
| 2uv0               | -7.80         | 3sis | -7.40         | 4dkr | -6.90         |
| 2uv0               | -7.80         | 3rwf | -7.40         | 4dgb | -6.90         |
| 2uv0               | -7.80         | 3alw | -7.40         | 4dgb | -6.90         |
| 2uv0               | -7.80         | 2zu1 | -7.40         | 3u83 | -6.90         |
| 2uv0               | -7.80         | 2yka | -7.40         | 3u83 | -6.90         |
| 2uv0               | -7.80         | 2ca1 | -7.40         | 3su4 | -6.90         |
| 2uv0               | -7.80         | 4lss | -7.30         | 3su4 | -6.90         |
| 2uv0               | -7.80         | 4lsp | -7.30         | 3s12 | -6.90         |
| 2uv0               | -7.80         | 4dkp | -7.30         | 3pqy | -6.90         |
| 2uv0               | -7.80         | 3uf5 | -7.30         | 3gsw | -6.90         |
| 2ge7               | -7.80         | 3m5h | -7.30         | 2xpx | -6.90         |
| 4eq0               | -7.70         | 3d0i | -7.30         | 2g69 | -6.90         |
| 4e5j               | -7.70         | 3bwa | -7.30         | 2g69 | -6.90         |
| 4bh4               | -7.70         | 2q5u | -7.30         | 1rpi | -6.90         |
| 3sud               | -7.70         | 2q5u | -7.30         | 4nwk | -6.80         |
| 3su1               | -7.70         | 2q5u | -7.30         | 4jpk | -6.80         |
| 3sis               | -7.70         | 2q5u | -7.30         | 4jpk | -6.80         |
| 3avk               | -7.70         | 2q5u | -7.30         | 4jpk | -6.80         |
| 2zu4               | -7.70         | 4e92 | -7.20         | 4ejd | -6.80         |
| 2vvy               | -7.70         | 4e92 | -7.20         | 4ejd | -6.80         |
| 4qrt               | -7.60         | 4dko | -7.20         | 4ejd | -6.80         |
| 4iv3               | -7.60         | 3rwi | -7.20         | 4e91 | -6.80         |
| 4g9z               | -7.60         | 2q5u | -7.20         | 4e5i | -6.80         |
| 4cqy               | -7.60         | 2axf | -7.20         | 3su6 | -6.80         |
| 4bh4               | -7.60         | 2axf | -7.20         | 3b71 | -6.80         |
| 4bh4               | -7.60         | 1rzk | -7.20         | 2xze | -6.80         |
| 4bh4               | -7.60         | 4u6h | -7.10         | 2xpx | -6.80         |
| 3nw8               | -7.60         | 4qrt | -7.10         | 2bvq | -6.80         |
| 1sys               | -7.60         | 4ejk | -7.10         | 4nwk | -6.70         |
| Papain<br>protease | -7.50         | 3w39 | -7.10         | 4ep3 | -6.70         |
| 4qrt               | -7.50         | 2ztz | -7.10         | 3gsn | -6.70         |
| 4j6r               | -7.50         | 2gvf | -7.10         | 3b71 | -6.70         |
| 3rwf               | -7.50         | 1f08 | -7.10         | 2wh6 | -6.70         |
| 3avg               | -7.50         | 1b50 | -7.10         | 1zsd | -6.70         |
|                    |               | 4oyd | -7.00         | 1rpi | -6.70         |

| PDB  | Docking score | PDB  | Docking score | PDB  | Docking score |
|------|---------------|------|---------------|------|---------------|
| 4ffv | -6.60         | 2vxw | -6.20         | 2mkr | -5.30         |
| 4epj | -6.60         | 4mmt | -6.10         | 2hfv | -5.30         |
| 4ep3 | -6.60         | 4i33 | -6.10         | 4ipz | -5.10         |
| 4ejr | -6.60         | 4gye | -6.10         | 4ipz | -5.10         |
| 4dmn | -6.60         | 4ekx | -6.10         | 4g8i | -5.10         |
| 4dmn | -6.60         | 4b4n | -6.10         | 4g8i | -5.10         |
| 4dga | -6.60         | 4b4n | -6.10         | 1qr8 | -5.10         |
| 3su1 | -6.60         | 2c3a | -6.10         | 2vxj | -5.00         |
| 3gzf | -6.60         | 4b8e | -6.00         | 4g9d | -4.90         |
| 2yol | -6.60         | 4b8e | -6.00         | 4ep2 | -4.80         |
| 2yol | -6.60         | 4b8e | -6.00         | 4ipz | -4.70         |
| 2wh6 | -6.60         | 3zd0 | -6.00         | 4ipz | -4.70         |
| 4dga | -6.50         | 3vie | -6.00         | 4g9d | -4.70         |
| 3avj | -6.50         | 3p8o | -6.00         | 3j23 | -4.70         |
| 2wfo | -6.50         | 3avk | -6.00         | 3j22 | -4.70         |
| 2v6q | -6.50         | 2c86 | -6.00         | 2me3 | -4.70         |
| 2me4 | -6.50         | 4c1w | -5.90         | 4eqj | -4.50         |
| 2m3l | -6.50         | 3sv9 | -5.90         | 4ep2 | -4.50         |
| 4gye | -6.40         | 3sv6 | -5.90         | 4ipz | -4.40         |
| 4ejd | -6.40         | 3su5 | -5.90         | 4ipz | -4.20         |
| 4ejd | -6.40         | 3su5 | -5.90         | 2l3h | -4.00         |
| 4ejd | -6.40         | 3su5 | -5.90         | 4ipz | -3.80         |
| 4c1w | -6.40         | 3kqk | -5.90         | 4ipz | -3.80         |
| 3suf | -6.40         | 2y1s | -5.90         | 4qhm | -3.60         |
| 3su3 | -6.40         | 4mod | -5.80         | 4epj | -3.60         |
| 3su3 | -6.40         | 4mod | -5.80         | 4ipz | -3.40         |
| 3kms | -6.40         | 2yhh | -5.80         | 4ipz | -3.40         |
| 3ifu | -6.40         | 2l2f | -5.80         | 4gu4 | -2.70         |
| 2wfo | -6.40         | 4nwl | -5.70         | 4gu4 | -2.70         |
| 1qr9 | -6.40         | 4ipz | -5.70         | 4gu4 | -2.70         |
| 3rkc | -6.30         | 4ipz | -5.70         | 4gu4 | -2.70         |
| 3p8n | -6.30         | 3sv7 | -5.70         | 4gu4 | -2.60         |
| 3oah | -6.30         | 3sug | -5.70         | 4gu4 | -2.60         |
| 3a07 | -6.30         | 3sug | -5.70         | 3m5i | -2.40         |
| 1yh3 | -6.30         | 3sud | -5.70         | 4gu3 | -1.80         |
| 4mze | -6.20         | 2x9m | -5.70         | 4gu3 | -1.80         |
| 4mze | -6.20         | 4mmv | -5.60         | 4gu3 | -1.80         |
| 4ejd | -6.20         | 4ejk | -5.60         | 4gu3 | -1.80         |
| 4ejd | -6.20         | 3sv6 | -5.60         | 4gu3 | -1.80         |
| 4ejd | -6.20         | 3i6k | -5.60         | 4gu3 | -1.80         |
| 3vie | -6.20         | 3avc | -5.60         | 4gu3 | -1.80         |
| 3sv9 | -6.20         | 1z8r | -5.60         | 4gu3 | -1.80         |
| 3sv7 | -6.20         | 4adq | -5.50         | 4gu3 | -1.80         |
| 3sue | -6.20         | 4uo4 | -5.40         | 4gu3 | -1.80         |
| 3giv | -6.20         | 4adq | -5.40         | 4gu3 | -1.80         |
| 3avn | -6.20         | 3vtt | -5.40         | 4gu3 | -1.70         |
| 2zu3 | -6.20         | 3vtt | -5.40         | 4dge | -1.70         |
| 2yhf | -6.20         | 2m3m | -5.40         | 2zsv | -1.40         |

| <b>PDB</b> | <b>Docking score</b> |
|------------|----------------------|
| 2zsv       | -1.30                |
| 4e0r       | -0.70                |

| <b>PDB</b> | <b>Docking score</b> |
|------------|----------------------|
| 4fqm       | -0.10                |

**Table S12.** Predicted docking score of Rutin against the viral protein panel

| PDB  | Docking score | PDB  | Docking score | PDB  | Docking score |
|------|---------------|------|---------------|------|---------------|
| 3kql | -12.10        | 3bev | -10.50        | 4mk8 | -10.00        |
| 3kql | -12.10        | 4lsr | -10.40        | 4jkp | -10.00        |
| 3kql | -12.10        | 4j4v | -10.40        | 4jkp | -10.00        |
| 4uny | -11.20        | 4fqr | -10.40        | 4g42 | -10.00        |
| 3koa | -11.00        | 4fqr | -10.40        | 4ejl | -10.00        |
| 4e7a | -10.90        | 4e78 | -10.40        | 3u7s | -10.00        |
| 4e7a | -10.90        | 4e78 | -10.40        | 3u7s | -10.00        |
| 3t3c | -10.90        | 3kqn | -10.40        | 3cj4 | -10.00        |
| 3fku | -10.90        | 3ggg | -10.40        | 3cj2 | -10.00        |
| 4lsv | -10.80        | 4uo7 | -10.30        | 2wr1 | -10.00        |
| 3se8 | -10.80        | 4uo7 | -10.30        | 2wr1 | -10.00        |
| 3se8 | -10.80        | 4uo7 | -10.30        | 2wr1 | -10.00        |
| 4uo2 | -10.70        | 4uo7 | -10.30        | 1syv | -10.00        |
| 4uo2 | -10.70        | 4uo7 | -10.30        | 1pk0 | -10.00        |
| 4uo2 | -10.70        | 4uo3 | -10.30        | 1idb | -10.00        |
| 4uo2 | -10.70        | 4uo3 | -10.30        | 4mk7 | -9.90         |
| 4uo2 | -10.70        | 4uo3 | -10.30        | 4jb9 | -9.90         |
| 4uo2 | -10.70        | 4uo3 | -10.30        | 4j4x | -9.90         |
| 4uo0 | -10.70        | 4uo3 | -10.30        | 3rwc | -9.90         |
| 4uo0 | -10.70        | 4rw6 | -10.30        | 3rwc | -9.90         |
| 4uo0 | -10.70        | 4j4s | -10.30        | 3cj0 | -9.90         |
| 4uo0 | -10.70        | 4j4s | -10.30        | 4uo0 | -9.80         |
| 4j4u | -10.70        | 3s11 | -10.30        | 4rw4 | -9.80         |
| 4fnk | -10.70        | 3b0w | -10.30        | 4rw4 | -9.80         |
| 3t3c | -10.70        | 2hty | -10.30        | 4pv9 | -9.80         |
| 4uo0 | -10.60        | 4uo3 | -10.20        | 4mk7 | -9.80         |
| 4uo0 | -10.60        | 4uo3 | -10.20        | 4lst | -9.80         |
| 4uo0 | -10.60        | 4fvu | -10.20        | 4ejl | -9.80         |
| 4uo0 | -10.60        | 4e5g | -10.20        | 2ygc | -9.80         |
| 4uo0 | -10.60        | 3ggg | -10.20        | 2bvo | -9.80         |
| 4uo0 | -10.60        | 2wrg | -10.20        | 2axg | -9.80         |
| 4uo0 | -10.60        | 1p9u | -10.20        | 1hhh | -9.80         |
| 4uo0 | -10.60        | 4uo7 | -10.10        | 4rw9 | -9.70         |
| 4uo0 | -10.60        | 4mkb | -10.10        | 4rw7 | -9.70         |
| 4uo0 | -10.60        | 4j6r | -10.10        | 4mka | -9.70         |
| 4uo0 | -10.60        | 4j4y | -10.10        | 4mk8 | -9.70         |
| 4uo0 | -10.60        | 4j4v | -10.10        | 4j4r | -9.70         |
| 4j4w | -10.60        | 4j4v | -10.10        | 4e76 | -9.70         |
| 3nxu | -10.60        | 4j4v | -10.10        | 4e5e | -9.70         |
| 4unw | -10.50        | 4j4v | -10.10        | 4adf | -9.70         |
| 4unw | -10.50        | 3kqh | -10.10        | 4adf | -9.70         |
| 4unw | -10.50        | 3bew | -10.10        | 4adf | -9.70         |
| 4fnk | -10.50        | 2hu0 | -10.10        | 4adf | -9.70         |
| 3kqn | -10.50        | 4uo5 | -10.00        | 4adf | -9.70         |
| 3kqn | -10.50        | 4uo5 | -10.00        | 4adf | -9.70         |
| 3kna | -10.50        | 4uo5 | -10.00        | 3lkh | -9.70         |

| PDB           | Docking score | PDB  | Docking score | PDB  | Docking score |
|---------------|---------------|------|---------------|------|---------------|
| 3lkh          | -9.70         | 2hcs | -9.50         | 3hkw | -9.30         |
| 3gsw          | -9.70         | 2bvp | -9.50         | 3h98 | -9.30         |
| 3ebj          | -9.70         | 1quv | -9.50         | 3gsw | -9.30         |
| 3cj2          | -9.70         | 1izi | -9.50         | 3gsv | -9.30         |
| 3bwa          | -9.70         | 4uo3 | -9.40         | 3gsq | -9.30         |
| 2ygc          | -9.70         | 4uo3 | -9.40         | 3gsq | -9.30         |
| 2wr2          | -9.70         | 4uo3 | -9.40         | 2xra | -9.30         |
| 2wr2          | -9.70         | 4qrs | -9.40         | 2wre | -9.30         |
| 2wr2          | -9.70         | 4qrs | -9.40         | 2wre | -9.30         |
| 4pg2          | -9.60         | 4opa | -9.40         | 2wre | -9.30         |
| 4o44          | -9.60         | 4mk9 | -9.40         | 2wre | -9.30         |
| 4lsu          | -9.60         | 4m8x | -9.40         | 2i4w | -9.30         |
| 4fqj          | -9.60         | 4gua | -9.40         | 2hjk | -9.30         |
| 3rwg          | -9.60         | 4g9f | -9.40         | 2ghw | -9.30         |
| 3rwg          | -9.60         | 4g8g | -9.40         | 2gec | -9.30         |
| 3r4b          | -9.60         | 4g8g | -9.40         | 1v2i | -9.30         |
| 3r4b          | -9.60         | 4cey | -9.40         | 1v2i | -9.30         |
| 3iyw          | -9.60         | 4cew | -9.40         | 5ajm | -9.20         |
| 3iyw          | -9.60         | 4a92 | -9.40         | 4wm7 | -9.20         |
| 3iyw          | -9.60         | 3vbr | -9.40         | 4unx | -9.20         |
| 3iyw          | -9.60         | 3vbo | -9.40         | 4unx | -9.20         |
| 3iyw          | -9.60         | 3rwi | -9.40         | 4unx | -9.20         |
| 3iyw          | -9.60         | 3klv | -9.40         | 4unx | -9.20         |
| 3hkw          | -9.60         | 3h98 | -9.40         | 4qru | -9.20         |
| 3cj4          | -9.60         | 3gsv | -9.40         | 4qru | -9.20         |
| 2ygb          | -9.60         | 3cj5 | -9.40         | 4o4g | -9.20         |
| 2ygb          | -9.60         | 3ciz | -9.40         | 4mgu | -9.20         |
| 2ht5          | -9.60         | 3ciz | -9.40         | 4m8y | -9.20         |
| 1r6a          | -9.60         | 2wre | -9.40         | 4m8y | -9.20         |
| Main protease | -9.50         | 2i4x | -9.40         | 4lkj | -9.20         |
| 4rw8          | -9.50         | 2i4v | -9.40         | 4i2p | -9.20         |
| 4q6r          | -9.50         | 2i4u | -9.40         | 4gaj | -9.20         |
| 4q6r          | -9.50         | 1v3d | -9.40         | 4gaj | -9.20         |
| 4mms          | -9.50         | 1v3d | -9.40         | 4g9z | -9.20         |
| 4mkb          | -9.50         | 1hhi | -9.40         | 4fqv | -9.20         |
| 4mka          | -9.50         | 4wm8 | -9.30         | 4bh2 | -9.20         |
| 4mk9          | -9.50         | 4i2q | -9.30         | 4bh2 | -9.20         |
| 4m30          | -9.50         | 4gag | -9.30         | 3v3m | -9.20         |
| 4m8x          | -9.50         | 4gag | -9.30         | 3tid | -9.20         |
| 4lsu          | -9.50         | 4fp8 | -9.30         | 3rwh | -9.20         |
| 4g43          | -9.50         | 4fp8 | -9.30         | 3rwh | -9.20         |
| 4fqj          | -9.50         | 4f3z | -9.30         | 3gsu | -9.20         |
| 3ztj          | -9.50         | 4e5f | -9.30         | 3gsr | -9.20         |
| 3vcl          | -9.50         | 3v3m | -9.30         | 3bwa | -9.20         |
| 3gso          | -9.50         | 3u82 | -9.30         | 3bw9 | -9.20         |
| 3cj3          | -9.50         | 3u82 | -9.30         | 3alz | -9.20         |
| 3cj0          | -9.50         | 3rwd | -9.30         | 2wrh | -9.20         |
| 2i4d          | -9.50         | 3i6l | -9.30         | 2wrg | -9.20         |

| PDB  | Docking score | PDB  | Docking score | PDB  | Docking score |
|------|---------------|------|---------------|------|---------------|
| 2wrg | -9.20         | 4fqy | -9.00         | 4mj1 | -8.80         |
| 2wrg | -9.20         | 4fb3 | -9.00         | 4i7f | -8.80         |
| 2wrg | -9.20         | 4cdw | -9.00         | 4gu3 | -8.80         |
| 2wre | -9.20         | 4bgx | -9.00         | 4gu3 | -8.80         |
| 2wr0 | -9.20         | 4bac | -9.00         | 4gu3 | -8.80         |
| 2hu4 | -9.20         | 3vcl | -9.00         | 4gu3 | -8.80         |
| 2hu4 | -9.20         | 3sdy | -9.00         | 4dgb | -8.80         |
| 2hu4 | -9.20         | 3sdy | -9.00         | 4cqW | -8.80         |
| 2hu4 | -9.20         | 3sdy | -9.00         | 4cdx | -8.80         |
| 2htw | -9.20         | 3bw9 | -9.00         | 3ku6 | -8.80         |
| 2gec | -9.20         | 3avf | -9.00         | 3ku6 | -8.80         |
| 1klm | -9.20         | 2xi5 | -9.00         | 3ku3 | -8.80         |
| 5ajm | -9.10         | 2xi5 | -9.00         | 2wr7 | -8.80         |
| 4kps | -9.10         | 2wrf | -9.00         | 1v3e | -8.80         |
| 4k7f | -9.10         | 1ida | -9.00         | 1v3c | -8.80         |
| 4k7f | -9.10         | 1hhk | -9.00         | 1v3c | -8.80         |
| 4g9f | -9.10         | 5ajm | -8.90         | 1v3c | -8.80         |
| 4fqy | -9.10         | 4qhk | -8.90         | 1v3c | -8.80         |
| 4fqv | -9.10         | 4mmu | -8.90         | 1sk7 | -8.80         |
| 4bh4 | -9.10         | 4gu4 | -8.90         | 1n5a | -8.80         |
| 4bh4 | -9.10         | 4gu4 | -8.90         | 1a41 | -8.80         |
| 4bh4 | -9.10         | 4gu4 | -8.90         | 4qru | -8.70         |
| 3rwe | -9.10         | 4gu4 | -8.90         | 4mds | -8.70         |
| 3rwe | -9.10         | 4gu4 | -8.90         | 4kpp | -8.70         |
| 3n0i | -9.10         | 4gu4 | -8.90         | 4ej8 | -8.70         |
| 3n0i | -9.10         | 4gu3 | -8.90         | 4ej8 | -8.70         |
| 3ku3 | -9.10         | 4gu3 | -8.90         | 4egt | -8.70         |
| 3h2l | -9.10         | 4gu3 | -8.90         | 4cqz | -8.70         |
| 3h2l | -9.10         | 4gu3 | -8.90         | 4cqr | -8.70         |
| 3gsu | -9.10         | 4gu3 | -8.90         | 4bh0 | -8.70         |
| 3gso | -9.10         | 4gu3 | -8.90         | 4a92 | -8.70         |
| 3d23 | -9.10         | 4gu3 | -8.90         | 3vbf | -8.70         |
| 3d23 | -9.10         | 4gu3 | -8.90         | 3tid | -8.70         |
| 3cj5 | -9.10         | 4cqs | -8.90         | 3gsx | -8.70         |
| 3cj3 | -9.10         | 4cqs | -8.90         | 3gsx | -8.70         |
| 2wr4 | -9.10         | 4cdU | -8.90         | 3gsr | -8.70         |
| 2wr0 | -9.10         | 4cdq | -8.90         | 3alx | -8.70         |
| 2wr0 | -9.10         | 4bgx | -8.90         | 2oy0 | -8.70         |
| 2wr0 | -9.10         | 3ok9 | -8.90         | 4uo8 | -8.60         |
| 2wa1 | -9.10         | 3oah | -8.90         | 4mj0 | -8.60         |
| 1rzj | -9.10         | 3nf8 | -8.90         | 4mds | -8.60         |
| 1hhj | -9.10         | 3nf8 | -8.90         | 4dgb | -8.60         |
| 4uo0 | -9.00         | 3mlh | -8.90         | 4dag | -8.60         |
| 4jo8 | -9.00         | 3hkw | -8.90         | 4cqV | -8.60         |
| 4hkj | -9.00         | 2wr0 | -8.90         | 4cqp | -8.60         |
| 4gv3 | -9.00         | 2hcn | -8.90         | 4cqp | -8.60         |
| 4gv3 | -9.00         | 1v3e | -8.90         | 4cqp | -8.60         |
| 4g9z | -9.00         | 1izh | -8.90         | 4bgw | -8.60         |

| PDB  | Docking score | PDB  | Docking score | PDB  | Docking score |
|------|---------------|------|---------------|------|---------------|
| 4bgw | -8.60         | 3rwf | -8.40         | 2c36 | -8.20         |
| 3zp6 | -8.60         | 3rwf | -8.40         | 2c36 | -8.20         |
| 3zp2 | -8.60         | 3lqa | -8.40         | 1oop | -8.20         |
| 3zp1 | -8.60         | 3i6g | -8.40         | 1f08 | -8.20         |
| 3vbh | -8.60         | 2wr3 | -8.40         | 4qhl | -8.10         |
| 3vbf | -8.60         | 2htu | -8.40         | 4mza | -8.10         |
| 3oah | -8.60         | 1p9s | -8.40         | 4mza | -8.10         |
| 3hky | -8.60         | 4qhn | -8.30         | 4mmr | -8.10         |
| 3hky | -8.60         | 4gve | -8.30         | 4mg3 | -8.10         |
| 2x83 | -8.60         | 4e5l | -8.30         | 4eee | -8.10         |
| 2oy0 | -8.60         | 4bh3 | -8.30         | 4dgc | -8.10         |
| 4pv9 | -8.50         | 3ztn | -8.30         | 4dgc | -8.10         |
| 4pv9 | -8.50         | 3rki | -8.30         | 4dgc | -8.10         |
| 4pv8 | -8.50         | 3o4l | -8.30         | 4dgc | -8.10         |
| 4i2p | -8.50         | 3nwf | -8.30         | 4dgc | -8.10         |
| 4ffz | -8.50         | 3nwa | -8.30         | 4dgc | -8.10         |
| 4cr0 | -8.50         | 3nwa | -8.30         | 4cqz | -8.10         |
| 4cqx | -8.50         | 3nf9 | -8.30         | 3sis | -8.10         |
| 4cqy | -8.50         | 3nf9 | -8.30         | 3s13 | -8.10         |
| 4cqy | -8.50         | 3nf6 | -8.30         | 3rwj | -8.10         |
| 4cqy | -8.50         | 3nf6 | -8.30         | 3rwj | -8.10         |
| 4cqp | -8.50         | 3mj5 | -8.30         | 3nf6 | -8.10         |
| 4bh4 | -8.50         | 3ku5 | -8.30         | 3nf6 | -8.10         |
| 3zpb | -8.50         | 3ku5 | -8.30         | 3d0h | -8.10         |
| 3zpb | -8.50         | 3cpl | -8.30         | 3cpl | -8.10         |
| 3zp0 | -8.50         | 3bwa | -8.30         | 3avb | -8.10         |
| 3tie | -8.50         | 3ava | -8.30         | 2zty | -8.10         |
| 3tie | -8.50         | 3ava | -8.30         | 2z35 | -8.10         |
| 3nw8 | -8.50         | 2wrc | -8.30         | 2uv0 | -8.10         |
| 2vww | -8.50         | 4cqu | -8.20         | 2uv0 | -8.10         |
| 1v3b | -8.50         | 4cqu | -8.20         | 2uv0 | -8.10         |
| 1r6a | -8.50         | 4cqu | -8.20         | 2uv0 | -8.10         |
| 5ajm | -8.40         | 4cqu | -8.20         | 2uv0 | -8.10         |
| 5ajm | -8.40         | 4cqu | -8.20         | 2uv0 | -8.10         |
| 5ajm | -8.40         | 4cqu | -8.20         | 2uv0 | -8.10         |
| 4f3i | -8.40         | 4bh1 | -8.20         | 2uv0 | -8.10         |
| 4f3i | -8.40         | 4bh1 | -8.20         | 2uv0 | -8.10         |
| 4e5j | -8.40         | 4bh1 | -8.20         | 2uv0 | -8.10         |
| 4dgd | -8.40         | 3nf9 | -8.20         | 2uv0 | -8.10         |
| 4cqp | -8.40         | 3nf9 | -8.20         | 1v3b | -8.10         |
| 4cqp | -8.40         | 3d0g | -8.20         | 1rv7 | -8.10         |
| 4bh3 | -8.40         | 3avg | -8.20         | 4u6h | -8.00         |
| 4bh3 | -8.40         | 3avb | -8.20         | 4pv8 | -8.00         |
| 4bh3 | -8.40         | 3avb | -8.20         | 4mj1 | -8.00         |
| 4bgy | -8.40         | 3alw | -8.20         | 4co6 | -8.00         |
| 3zpa | -8.40         | 2zu5 | -8.20         | 3nfa | -8.00         |
| 3zp3 | -8.40         | 2zu1 | -8.20         | 3nf7 | -8.00         |
| 3se9 | -8.40         | 2xwy | -8.20         | 3avl | -8.00         |

| PDB  | Docking score | PDB  | Docking score | PDB             | Docking score |
|------|---------------|------|---------------|-----------------|---------------|
| 3avh | -8.00         | 3kms | -7.70         | 3sv6            | -7.30         |
| 3avb | -8.00         | 2iph | -7.70         | 3su2            | -7.30         |
| 3ava | -8.00         | 2axf | -7.70         | 3rkc            | -7.30         |
| 2zu4 | -8.00         | 1n59 | -7.70         | 3kmq            | -7.30         |
| 2uv0 | -8.00         | 4gye | -7.60         | 3avj            | -7.30         |
| 1sys | -8.00         | 4gv9 | -7.60         | 2xze            | -7.30         |
| 1rzk | -8.00         | 3su6 | -7.60         | 2vvx            | -7.30         |
| 4fqi | -7.90         | 3rwi | -7.60         | 2mgu            | -7.30         |
| 4fqi | -7.90         | 3nfa | -7.60         | 2ghv            | -7.30         |
| 4dgd | -7.90         | 3nfa | -7.60         | 1qz8            | -7.30         |
| 4cqr | -7.90         | 3nf8 | -7.60         | Spike RBD       | -7.20         |
| 3nf7 | -7.90         | 3avg | -7.60         | Papain protease | -7.20         |
| 3ava | -7.90         | 2lsp | -7.60         | 4qrt            | -7.20         |
| 2yka | -7.90         | 4mj0 | -7.50         | 4i33            | -7.20         |
| 2vvx | -7.90         | 4iv1 | -7.50         | 4i32            | -7.20         |
| 2vww | -7.90         | 4dkq | -7.50         | 4i31            | -7.20         |
| 2axf | -7.90         | 3suf | -7.50         | 4gzf            | -7.20         |
| 1b50 | -7.90         | 3sud | -7.50         | 4g9d            | -7.20         |
| 4mg3 | -7.80         | 3su2 | -7.50         | 4eq0            | -7.20         |
| 4ffy | -7.80         | 3su2 | -7.50         | 4dco            | -7.20         |
| 4ekx | -7.80         | 3su0 | -7.50         | 3sv8            | -7.20         |
| 4e92 | -7.80         | 3nf8 | -7.50         | 3sud            | -7.20         |
| 4cqy | -7.80         | 3ifu | -7.50         | 3avk            | -7.20         |
| 4bgz | -7.80         | 3gsw | -7.50         | 3avc            | -7.20         |
| 3su0 | -7.80         | 2wh6 | -7.50         | 2yhf            | -7.20         |
| 3sit | -7.80         | 2vvy | -7.50         | 1yh3            | -7.20         |
| 3sit | -7.80         | 2iph | -7.50         | 4i31            | -7.10         |
| 3sit | -7.80         | 2iph | -7.50         | 3sv9            | -7.10         |
| 3sit | -7.80         | 1b53 | -7.50         | 3sv7            | -7.10         |
| 3sit | -7.80         | 4oyd | -7.40         | 3gsn            | -7.10         |
| 3pqy | -7.80         | 4oph | -7.40         | 3a07            | -7.10         |
| 3nfa | -7.80         | 4eq0 | -7.40         | 2xya            | -7.10         |
| 3nf7 | -7.80         | 4e5i | -7.40         | 2wh6            | -7.10         |
| 3nf7 | -7.80         | 4dkr | -7.40         | 2ge7            | -7.10         |
| 3avl | -7.80         | 3w39 | -7.40         | 2ca1            | -7.10         |
| 3avh | -7.80         | 3sv7 | -7.40         | 3sis            | -7.00         |
| 3avc | -7.80         | 3su1 | -7.40         | 3p8o            | -7.00         |
| 2x83 | -7.80         | 3avn | -7.40         | 2xze            | -7.00         |
| 2iph | -7.80         | 2ge8 | -7.40         | 2wfo            | -7.00         |
| 4uo6 | -7.70         | 2c7u | -7.40         | 4qrt            | -6.90         |
| 4uo6 | -7.70         | 2bvq | -7.40         | 4nwk            | -6.90         |
| 4qrt | -7.70         | 4iv3 | -7.30         | 4mmt            | -6.90         |
| 4mze | -7.70         | 4e91 | -7.30         | 4lsp            | -6.90         |
| 4mze | -7.70         | 4dkp | -7.30         | 4ejk            | -6.90         |
| 4jpk | -7.70         | 4b8e | -7.30         | 3sv9            | -6.90         |
| 4gye | -7.70         | 4b8e | -7.30         | 3sug            | -6.90         |
| 4e92 | -7.70         | 4b8e | -7.30         | 3sug            | -6.90         |
| 3ro5 | -7.70         | 3uf5 | -7.30         | 3su3            | -6.90         |



| PDB  | Docking score | PDB  | Docking score | PDB  | Docking score |
|------|---------------|------|---------------|------|---------------|
| 3su3 | -6.90         | 4ejd | -6.30         | 4b4n | -5.70         |
| 4eqj | -6.80         | 4ejd | -6.30         | 3kqk | -5.70         |
| 4ep3 | -6.80         | 3sv6 | -6.30         | 2yhh | -5.70         |
| 4ep3 | -6.80         | 3su6 | -6.30         | 4ipz | -5.60         |
| 4dga | -6.80         | 3su1 | -6.30         | 4g9d | -5.60         |
| 4c1w | -6.80         | 2m3l | -6.30         | 2zol | -5.60         |
| 4c1w | -6.80         | 2gvf | -6.30         | 2y1s | -5.60         |
| 3sue | -6.80         | 2c3a | -6.30         | 2vxj | -5.60         |
| 3mj5 | -6.80         | 4oyd | -6.20         | 1qr9 | -5.60         |
| 3gzf | -6.80         | 4ejd | -6.20         | 4ipz | -5.50         |
| 2yol | -6.80         | 4dmn | -6.20         | 4ipz | -5.40         |
| 2yol | -6.80         | 3su5 | -6.20         | 2m3m | -5.40         |
| 4gzf | -6.70         | 3su5 | -6.20         | 1qr8 | -5.40         |
| 4dga | -6.70         | 3su5 | -6.20         | 4ejr | -5.30         |
| 3uqi | -6.70         | 3sit | -6.20         | 4ipz | -5.20         |
| 3p8n | -6.70         | 3avn | -6.20         | 4ipz | -5.20         |
| 2v6q | -6.70         | 2zu3 | -6.20         | 4ipz | -5.20         |
| 2q5u | -6.70         | 4g8i | -6.10         | 3avk | -5.20         |
| 2q5u | -6.70         | 4ejk | -6.10         | 4ipz | -5.10         |
| 2hfz | -6.70         | 4ejk | -6.10         | 4ipz | -5.10         |
| 4mmv | -6.60         | 4ejd | -6.10         | 4ipz | -5.10         |
| 4jpi | -6.60         | 4ejd | -6.10         | 4ipz | -5.10         |
| 3u83 | -6.60         | 3vie | -6.10         | 1zsd | -5.10         |
| 3u83 | -6.60         | 3avj | -6.10         | 4mod | -4.80         |
| 2vxw | -6.60         | 2ztz | -6.10         | 4mod | -4.80         |
| 2q5u | -6.60         | 2xpx | -6.10         | 4adq | -4.80         |
| 2q5u | -6.60         | 2xpx | -6.10         | 3zd0 | -4.80         |
| 2q5u | -6.60         | 2g69 | -6.10         | 3vtt | -4.80         |
| 2q5u | -6.60         | 4nwk | -6.00         | 4adq | -4.70         |
| 4uo4 | -6.50         | 4ejd | -6.00         | 3vtt | -4.60         |
| 4lss | -6.50         | 3vie | -6.00         | 3i6k | -4.60         |
| 4epj | -6.50         | 2q7c | -6.00         | 2me3 | -4.60         |
| 3uqi | -6.50         | 2q7c | -6.00         | 2mkr | -4.50         |
| 3su4 | -6.50         | 2q7c | -6.00         | 4ep2 | -4.40         |
| 3su4 | -6.50         | 2me2 | -6.00         | 2x9m | -4.40         |
| 3m5h | -6.50         | 2l2f | -6.00         | 4g8i | -4.30         |
| 2q7c | -6.50         | 2g69 | -6.00         | 4epj | -4.30         |
| 2q7c | -6.50         | 4ejd | -5.90         | 2me4 | -4.30         |
| 2q7c | -6.50         | 2c86 | -5.90         | 1hhg | -4.20         |
| 1rpi | -6.50         | 1z8r | -5.90         | 2l3h | -4.10         |
| 4nwl | -6.40         | 1rpi | -5.90         | 4ep2 | -3.80         |
| 4dmn | -6.40         | 3s12 | -5.80         | 4lkk | -3.70         |
| 3d0i | -6.40         | 3giv | -5.80         | 3j23 | -3.70         |
| 2wfo | -6.40         | 3b71 | -5.80         | 3j22 | -3.70         |
| 1rq9 | -6.40         | 3b71 | -5.80         | 4qhm | -3.20         |
| 4i2q | -6.30         | 4ipz | -5.70         | 4g2k | -3.20         |
| 4ejd | -6.30         | 4ipz | -5.70         | 4lki | -3.00         |
| 4ejd | -6.30         | 4b4n | -5.70         | 4g1l | -2.80         |

| <b>PDB</b> | <b>Docking score</b> |
|------------|----------------------|
| 4lkh       | -2.70                |
| 4g1g       | -2.70                |
| 4lcx       | -2.40                |
| 4kol       | -1.90                |
| 4dge       | -1.10                |
| 4g2k       | -0.90                |
| 2zsv       | -0.80                |
| 4kon       | -0.70                |
| 2zsv       | -0.70                |
| 4e0r       | -0.30                |
| 4kom       | -0.20                |
| 4g1o       | -0.10                |
| 4fqm       | -0.10                |
